# Supplementary material for: One-pot synthesis of tetrahydro-pyrrolobenzodiazepines and tetrahydro-pyrrolobenzodiazepinones through sequential 1,3-dipolar cycloaddition/N-alkylation (N-acylation)/Staudinger/aza-Wittig reactions
Source: Royal Society of Chemistry journal article supplement (doi:10.1039/c9gc01642b), 2019-01-01
Supplement: c9gc01642b1.pdf [file c9gc01642b1.pdf]

## Supporting Information

### **One-pot Synthesis of Tetrahydro-pyrrol benzodiazepines and Tetrahydropyrrol benzodiazepinons Through the sequence of 1,3-Dipolar cycloaddition/*N*-Alkylation/Staudinger/Aza-Wittig reaction**

Xiaoming Ma,<sup>a†</sup> Xiaofeng Zhang,<sup>b†</sup> Jonh Mark Awad,<sup>b</sup> Guoshu Xie,<sup>b</sup> Weiqi Qiu,<sup>b</sup> Wei Zhang<sup>\*b</sup>

<sup>a</sup> School of Pharmaceutical Engineering and Life Science, Changzhou University, Jiangsu 213164, P. R. China

<sup>b</sup> Department of Chemistry, University of Massachusetts Boston, 100 Morrissey Boulevard, Boston, MA 02125, USA. E-mail: wei2.zhang@umb.edu

<sup>†</sup> These authors contributed equally to this work.

#### Content

|                                                                                       |     |
|---------------------------------------------------------------------------------------|-----|
| 1. General information.....                                                           | S2  |
| 2. General procedure for one pot synthesis of <b>7</b> and <b>10</b> .....            | S2  |
| 3. Characterization of intermediate <b>6a</b> , products <b>7</b> and <b>10</b> ..... | S3  |
| 4. NMR spectra of intermediate <b>6a</b> , products <b>7</b> and <b>10</b> .....      | S14 |
| 5. Green chemistry metrics analysis .....                                             | S43 |
| 6. References for green metrics .....                                                 | S48 |

## 1. General information

Chemicals and solvents were purchased from Sijama, TCI and Oakwood.  $^1\text{H}$  (400 MHz) and  $^{13}\text{C}$  NMR spectra (101 MHz) were recorded on a 400 MHz Agilent NMR spectrometer. Chemical shifts were reported in parts per million (ppm), and the residual solvent peak was used as an internal reference: proton (chloroform  $\delta$  7.26, dmsO  $\delta$  2.50), carbon (chloroform  $\delta$  77.0, dmsO  $\delta$  39.53). Multiplicity was indicated as follows: s (singlet), d (doublet), t (triplet), q (quartet), m (multiplet), dd (doublet of doublet), br s (broad singlet). Coupling constants were reported in Hertz (Hz). LC-MS were performed on an Agilent 2100 system. A  $\text{C}_{18}$  column (5.0  $\mu\text{m}$ , 6.0 x 50 mm) was used for the separation. The mobile phases were methanol and water both containing 0.05% trifluoroacetic acid. A linear gradient was used to increase from 25:75 v/v methanol/water to 100% methanol over 7.0 min at a flow rate of 0.7 mL/min. UV detections were conducted at 210 nm, 254 nm and 365 nm. Low resolution mass spectra were recorded in APCI (atmospheric pressure chemical ionization). Flash chromatography separations were performed on YAMAZEN AI-580 flash column system with Agela silica gel columns (230-400  $\mu\text{m}$  mesh) and Angela Flash/Cheetah System with Venusil PrepG  $\text{C}_{18}$  column (10  $\mu\text{m}$ , 120  $\text{\AA}$ , 21.2 mm x 250 mm).

## 2. General procedures for one-pot synthesis of **7** and **10**

*General procedures for one-pot synthesis of tetrahydro-pyrrolo[1,2-d][1,4]benzodiazepine **7**:*

A solution of 2-azidobenzaldehyde **1** (0.5 mmol), amino ester **2** (0.6 mmol) and maleimide **3** (0.55 mmol) in  $\text{CH}_3\text{CN}$  (2 mL) with  $\text{Et}_3\text{N}$  (0.75 mmol) were heated at 125  $^\circ\text{C}$  for 30 min under microwave in a sealed vial. Then bromide ketone **5** (1.5 mmol) and  $\text{K}_2\text{CO}_3$  (1 mmol) was added into the pyrrolidine **4** containing mixture followed by heating at 120  $^\circ\text{C}$  for 2 h. Upon the completion of the reaction as monitored by LC-MS,  $\text{PPh}_3$  (0.6 mmol) was added to the mixture and then heated at 105  $^\circ\text{C}$  for 6 h. The concentrated reaction mixture was separated with a Flash chromatography system (YAMAZEN AI-580 flash column system) or a semi-preparative HPLC with a  $\text{C}_{18}$  column (Angela HP-100 pre-LC system) to afford purified major diastereomer of product **7**.

*General procedures for one-pot synthesis of tetrahydro-pyrrolo[1,2-d][1,4]benzodiazepinone **10**:*

A solution of 2-azidobenzaldehyde **1** (0.5 mmol), amino ester **2** (0.6 mmol) and maleimide **3** (0.55 mmol) in  $\text{CH}_3\text{CN}$  (2 mL) with  $\text{Et}_3\text{N}$  (0.75 mmol) were heated at 125  $^\circ\text{C}$  for 30 min under microwave in a sealed vial. The phenylglyoxylic acid **8a** (0.5 mmol) and  $\text{Et}_3\text{N}$  (0.5 mmol) were then added into the mixture, followed by addition of 2,4,6-trichloro-1,3,5-triazine (TCT)/ $\text{CH}_3\text{CN}$  solution (0.5 mmol/1mL), the mixture was stirred at room temperature for 30 min. Upon the completion of the reaction as monitored by LC-MS,  $\text{PPh}_3$  (0.6 mmol) was added to the mixture and then heated at 105  $^\circ\text{C}$  for 6 h. The concentrated reaction mixture was separated with a Flash chromatography system (YAMAZEN AI-580 flash column system) or a semi-preparative HPLC with a  $\text{C}_{18}$  column (Angela HP-100 pre-LC system) to afford purified major diastereomer of product **10**.

### 3. Characterization of intermediate 6a, products 7 and 10

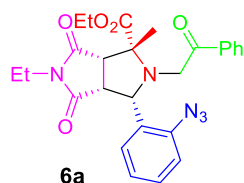

ethyl (1*R*,3*S*,3*aR*,6*aS*)-3-(2-azidophenyl)-5-ethyl-1-methyl-4,6-dioxo-2-(2-oxo-2-phenylethyl)octahydroindolo[3,4-*c*]pyrrole-1-carboxylate (**6a**):

White solid, 90% yield.

$^1\text{H NMR}$  (400 MHz,  $\text{CDCl}_3$ )  $\delta$  7.82 – 7.78 (m, 2H), 7.49 – 7.44 (m, 1H), 7.33 (dd,  $J = 10.8, 4.7$  Hz, 2H), 7.27 – 7.24 (m, 1H), 7.20 (td,  $J = 7.7, 1.5$  Hz, 1H), 7.07 (d,  $J = 7.9$  Hz, 1H), 6.84 (t,  $J = 7.4$  Hz, 1H), 5.43 (d,  $J = 10.2$  Hz, 1H), 4.30 (q,  $J = 7.1$  Hz, 2H), 4.09 (s, 2H), 3.66 (dd,  $J = 10.2, 8.2$  Hz, 1H), 3.31 (dd,  $J = 13.3, 7.1$  Hz, 1H), 3.25 (d,  $J = 8.2$  Hz, 1H), 3.19 (dd,  $J = 13.4, 7.1$  Hz, 1H), 1.59 (s, 3H), 1.33 (t,  $J = 7.2$  Hz, 3H), 0.93 (t,  $J = 7.2$  Hz, 3H).

$^{13}\text{C NMR}$  (101 MHz,  $\text{CDCl}_3$ )  $\delta$  198.35 (s), 175.19 (s), 174.41 (s), 172.06 (s), 138.99 (s), 136.01 (s), 133.08 (s), 129.17 (s), 128.48 (d,  $J = 18.0$  Hz), 128.00 (d,  $J = 6.8$  Hz), 124.30 (s), 118.06 (s), 70.05 (s), 61.43 (s), 59.10 (s), 54.88 (s), 52.35 (s), 46.85 (s), 33.72 (s), 30.87 (s), 20.78 (s), 14.05 (s), 12.77 (s).

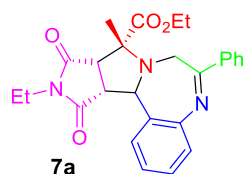

ethyl (9*R*,9*aS*,12*aR*)-11-ethyl-9-methyl-10,12-dioxo-6-phenyl-7,9,9*a*,10,11,12,12*a*,12*b*-octahydrobenzo[*ff*]pyrrolo[3',4':3,4]pyrrolo[1,2-*d*][1,4]diazepine-9-carboxylate (**7a**):

White solid, 85% yield. MP: 116-117°C.

$^1\text{H NMR}$  (400 MHz,  $\text{CDCl}_3$ )  $\delta$  7.70 – 7.65 (m, 2H), 7.40 – 7.34 (m, 1H), 7.23 – 7.15 (m, 3H), 7.11 (dd,  $J = 7.4, 1.6$  Hz, 1H), 7.05 – 6.97 (m, 2H), 4.21 (d,  $J = 5.2$  Hz, 1H), 4.10 – 4.01 (m, 2H), 3.82 (t,  $J = 9.8$  Hz, 1H), 3.77 – 3.69 (m, 3H), 3.14 (d,  $J = 7.9$  Hz, 1H), 3.03 (dd,  $J = 7.9, 5.2$  Hz, 1H), 1.57 (s, 3H), 1.30 (t,  $J = 7.2$  Hz, 3H), 1.16 (dd,  $J = 8.3, 6.0$  Hz, 3H).

$^{13}\text{C NMR}$  (101 MHz,  $\text{CDCl}_3$ )  $\delta$  198.42 (s), 175.51 (s), 171.17 (s), 162.24 (s), 144.75 (s), 135.57 (s), 132.55 (s), 131.01 (s), 130.17 (s), 128.45 (s), 127.68 (s), 125.78 (s), 124.21 (s), 122.34 (s), 70.30 (s), 61.84 (s), 59.11 (s), 55.38 (s), 55.03 (s), 39.68 (s), 35.02 (s), 18.20 (s), 13.83 (s), 12.89 (s).

HRMS (ESI-TOF,  $m/z$ ):  $[\text{M}+\text{H}]^+$  calculated for  $\text{C}_{26}\text{H}_{28}\text{N}_3\text{O}_4$  446.2080, found 446.2085

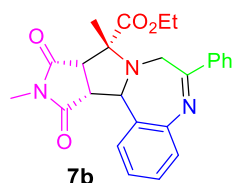

ethyl (9*R*,9*aS*,12*aR*)-9,11-dimethyl-10,12-dioxo-6-phenyl-7,9,9*a*,10,11,12,12*a*,12*b*-octahydrobenzo[*ff*]pyrrolo[3',4':3,4]pyrrolo[1,2-*d*][1,4]diazepine-9-carboxylate (**7b**):

White solid, 83% yield. MP: 141-142.5°C.

$^1\text{H NMR}$  (400 MHz,  $\text{CDCl}_3$ )  $\delta$  7.67 – 7.60 (m, 2H), 7.41 – 7.35 (m, 1H), 7.27 – 7.17 (m, 3H), 7.14 – 7.08

(m, 2H), 7.01 (td,  $J = 7.4, 1.3$  Hz, 1H), 4.26 (d,  $J = 5.2$  Hz, 1H), 4.08 – 4.00 (m, 1H), 3.98 – 3.90 (m, 1H), 3.86 (d,  $J = 15.9$  Hz, 1H), 3.67 (d,  $J = 15.8$  Hz, 1H), 3.17 (s, 4H), 3.07 (dd,  $J = 7.7, 5.2$  Hz, 1H), 1.56 (s, 3H), 1.08 (t,  $J = 7.2$  Hz, 3H).

$^{13}\text{C}$  NMR (101 MHz,  $\text{cdCl}_3$ )  $\delta$  198.20 (s), 175.93 (s), 171.29 (s), 163.07 (s), 144.64 (s), 135.52 (s), 132.70 (s), 130.86 (s), 130.23 (s), 128.33 (s), 127.80 (s), 125.89 (s), 124.40 (s), 122.60 (s), 70.30 (s), 61.82 (s), 59.00 (s), 55.73 (s), 54.17 (s), 39.72 (s), 30.88 (s), 26.22 (s), 18.36 (s), 13.72 (s).

HRMS (ESI-TOF,  $m/z$ ):  $[\text{M}+\text{H}]^+$  calculated for  $\text{C}_{25}\text{H}_{26}\text{N}_3\text{O}_4$  432.1923, found 432.1927

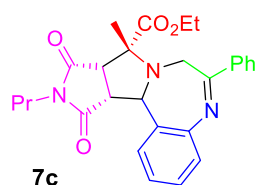

*ethyl (9R,9aS,12aR)-9-methyl-10,12-dioxo-6-phenyl-11-propyl-7,9,9a,10,11,12,12a,12b-octahydrobenzo[f]pyrrolo[3',4':3,4]pyrrolo[1,2-d][1,4]diazepine-9-carboxylate (7c):*

White solid, 63% yield. MP: 102-104°C.

$^1\text{H}$  NMR (400 MHz,  $\text{cdCl}_3$ )  $\delta$  7.65 (dt,  $J = 8.4, 1.5$  Hz, 2H), 7.39 – 7.34 (m, 1H), 7.19 (tdd,  $J = 8.1, 7.6, 1.7$  Hz, 3H), 7.07 (ddd,  $J = 19.6, 7.6, 1.4$  Hz, 2H), 6.98 (td,  $J = 7.4, 1.3$  Hz, 1H), 4.20 (d,  $J = 5.2$  Hz, 1H), 4.08 – 3.96 (m, 2H), 3.83 (d,  $J = 15.7$  Hz, 1H), 3.73 – 3.65 (m, 2H), 3.57 (ddd,  $J = 13.0, 8.4, 7.1$  Hz, 1H), 3.13 (d,  $J = 7.9$  Hz, 1H), 3.03 (dd,  $J = 7.9, 5.2$  Hz, 1H), 1.77 – 1.67 (m, 2H), 1.56 (s, 3H), 1.12 (t,  $J = 7.2$  Hz, 3H), 0.96 (t,  $J = 7.4$  Hz, 3H).

$^{13}\text{C}$  NMR (101 MHz,  $\text{cdCl}_3$ )  $\delta$  198.38 (s), 175.72 (s), 171.21 (s), 162.44 (s), 144.77 (s), 135.56 (s), 132.58 (s), 130.94 (s), 130.14 (s), 128.43 (s), 127.71 (s), 125.85 (s), 124.22 (s), 122.40 (s), 70.23 (s), 61.80 (s), 59.07 (s), 55.43 (s), 54.76 (s), 41.54 (s), 39.64 (s), 20.81 (s), 18.25 (s), 13.78 (s), 11.40 (s).

HRMS (ESI-TOF,  $m/z$ ):  $[\text{M}+\text{H}]^+$  calculated for  $\text{C}_{27}\text{H}_{30}\text{N}_3\text{O}_4$  460.2236, found 460.2234

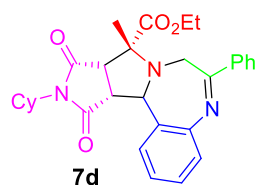

*ethyl (9R,9aS,12aR)-11-cyclohexyl-9-methyl-10,12-dioxo-6-phenyl-7,9,9a,10,11,12,12a,12b-octahydrobenzo[f]pyrrolo[3',4':3,4]pyrrolo[1,2-d][1,4]diazepine-9-carboxylate (7d):*

White solid, 80% yield. MP: 106-108.5°C.

$^1\text{H}$  NMR (400 MHz,  $\text{cdCl}_3$ )  $\delta$  7.74 (dt,  $J = 8.4, 1.5$  Hz, 2H), 7.38 – 7.33 (m, 1H), 7.18 – 7.13 (m, 3H), 7.07 (dd,  $J = 7.5, 1.2$  Hz, 1H), 6.98 – 6.92 (m, 2H), 4.19 – 4.09 (m, 4H), 3.78 (d,  $J = 3.5$  Hz, 2H), 3.07 (d,  $J = 8.0$  Hz, 1H), 2.92 (dd,  $J = 8.0, 5.2$  Hz, 1H), 2.41 – 2.24 (m, 2H), 1.86 (t,  $J = 10.7$  Hz, 2H), 1.77 – 1.67 (m, 3H), 1.56 (s, 3H), 1.35 (dddd,  $J = 16.6, 10.4, 5.4, 2.2$  Hz, 3H), 1.27 – 1.22 (m, 3H).

$^{13}\text{C}$  NMR (101 MHz,  $\text{cdCl}_3$ )  $\delta$  198.71 (s), 175.37 (s), 171.15 (s), 162.19 (s), 144.79 (s), 135.61 (s), 132.38 (s), 130.96 (s), 130.03 (s), 128.56 (s), 127.57 (s), 125.72 (s), 123.96 (s), 121.84 (s), 70.31 (s), 61.88 (s), 59.09 (s), 55.73 (s), 55.24 (s), 53.03 (s), 39.14 (s), 29.15 (s), 28.12 (s), 25.92 (d,  $J = 17.5$  Hz), 25.24 (s), 18.14 (s), 14.02 (s).

HRMS (ESI-TOF,  $m/z$ ):  $[\text{M}+\text{H}]^+$  calculated for  $\text{C}_{30}\text{H}_{34}\text{N}_3\text{O}_4$  500.2549, found 500.2556

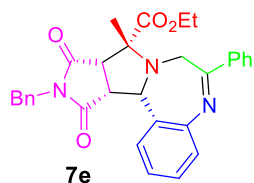

*ethyl (9R,9aS,12aR,12bS)-11-benzyl-9-methyl-10,12-dioxo-6-phenyl-7,9,9a,10,11,12,12a,12b-octahydrobenzo[f]pyrrolo[3',4':3,4]pyrrolo[1,2-d][1,4]diazepine-9-carboxylate (7e):*

White solid, 88% yield. MP: 194-197°C.

<sup>1</sup>H NMR (400 MHz, cdcl<sub>3</sub>) δ 7.70 – 7.64 (m, 2H), 7.50 – 7.45 (m, 2H), 7.41 (t, *J* = 7.4 Hz, 1H), 7.33 – 7.19 (m, 6H), 7.14 (ddd, *J* = 10.7, 7.6, 1.4 Hz, 2H), 7.01 (td, *J* = 7.4, 1.4 Hz, 1H), 4.95 (d, *J* = 14.1 Hz, 1H), 4.81 (d, *J* = 14.1 Hz, 1H), 4.28 (d, *J* = 5.3 Hz, 1H), 4.01 – 3.86 (m, 3H), 3.71 (d, *J* = 15.8 Hz, 1H), 3.17 (d, *J* = 8.0 Hz, 1H), 3.07 (dd, *J* = 7.9, 5.3 Hz, 1H), 1.58 (s, 3H), 1.09 (t, *J* = 7.2 Hz, 3H).

<sup>13</sup>C NMR (101 MHz, cdcl<sub>3</sub>) δ 198.26 (s), 175.44 (s), 171.23 (s), 162.03 (s), 144.69 (s), 136.31 (s), 135.59 (s), 132.69 (s), 130.80 (s), 130.15 (s), 128.79 (s), 128.42 (d, *J* = 7.9 Hz), 127.86 (s), 127.63 (s), 126.21 (s), 124.44 (s), 122.65 (s), 70.23 (s), 61.79 (s), 59.00 (s), 55.59 (s), 54.16 (s), 43.09 (s), 40.01 (s), 18.56 (s), 13.76 (s).

HRMS (ESI-TOF, *m/z*): [M+H]<sup>+</sup> calculated for C<sub>31</sub>H<sub>30</sub>N<sub>3</sub>O<sub>4</sub> 508.2236, found 508.2240

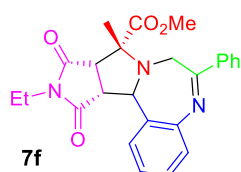

*methyl (9R,9aS,12aR)-11-ethyl-9-methyl-10,12-dioxo-6-phenyl-7,9,9a,10,11,12,12a,12b-octahydrobenzo[f]pyrrolo[3',4':3,4]pyrrolo[1,2-d][1,4]diazepine-9-carboxylate (7f):*

White solid, 85% yield. MP: 113-114.5°C.

<sup>1</sup>H NMR (400 MHz, cdcl<sub>3</sub>) δ 7.65 (dt, *J* = 8.5, 1.5 Hz, 2H), 7.40 – 7.34 (m, 1H), 7.26 – 7.17 (m, 3H), 7.11 (ddd, *J* = 10.4, 7.7, 1.3 Hz, 2H), 7.01 (td, *J* = 7.4, 1.3 Hz, 1H), 4.25 (d, *J* = 5.2 Hz, 1H), 3.86 (d, *J* = 15.8 Hz, 1H), 3.78 – 3.66 (m, 3H), 3.54 (s, 3H), 3.13 (d, *J* = 7.9 Hz, 1H), 3.03 (dd, *J* = 7.9, 5.2 Hz, 1H), 1.57 (s, 3H), 1.26 (t, *J* = 7.2 Hz, 3H).

<sup>13</sup>C NMR (101 MHz, cdcl<sub>3</sub>) δ 198.45 (s), 175.68 (s), 171.59 (s), 162.34 (s), 144.74 (s), 135.53 (s), 132.62 (s), 130.96 (s), 130.22 (s), 128.35 (s), 127.76 (s), 125.87 (s), 124.31 (s), 122.37 (s), 70.32 (s), 58.98 (s), 55.41 (s), 54.57 (s), 52.34 (s), 50.78 (s), 39.57 (s), 35.19 (s), 18.27 (s), 12.72 (s).

HRMS (ESI-TOF, *m/z*): [M+H]<sup>+</sup> calculated for C<sub>25</sub>H<sub>26</sub>N<sub>3</sub>O<sub>4</sub> 432.1923, found 432.1922

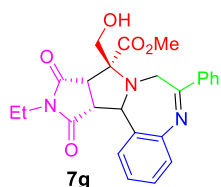

*methyl (9S,9aS,12aR)-11-ethyl-9-(hydroxymethyl)-10,12-dioxo-6-phenyl-7,9,9a,10,11,12,12a,12b-octahydrobenzo[f]pyrrolo[3',4':3,4]pyrrolo[1,2-d][1,4]diazepine-9-carboxylate (7g):*

White solid, 68% yield. MP: 171-172.5°C.

<sup>1</sup>H NMR (400 MHz, dmsO) δ 7.49 (dd, *J* = 7.4, 1.4 Hz, 1H), 7.40 (ddd, *J* = 5.7, 4.0, 1.6 Hz, 2H), 7.37 –

7.29 (m, 3H), 7.26 (ddd,  $J = 7.8, 4.5, 1.3$  Hz, 2H), 7.19 (td,  $J = 7.4, 1.3$  Hz, 1H), 6.72 (d,  $J = 2.9$  Hz, 1H), 5.05 (d,  $J = 5.8$  Hz, 1H), 4.33 (d,  $J = 11.7$  Hz, 1H), 4.17 (d,  $J = 11.7$  Hz, 1H), 3.58 (s, 5H), 3.37 – 3.32 (m, 1H), 3.16 (dd,  $J = 9.7, 6.5$  Hz, 1H), 2.73 (d,  $J = 14.8$  Hz, 1H), 2.32 (dd,  $J = 14.8, 2.9$  Hz, 1H), 1.11 (t,  $J = 7.2$  Hz, 3H).

$^{13}\text{C}$  NMR (101 MHz, dms $\text{o}$ )  $\delta$  175.21 (s), 170.50 (s), 163.51 (s), 144.71 (s), 144.07 (s), 130.98 (s), 129.82 (s), 128.33 (s), 126.03 (s), 125.76 (s), 124.59 (d,  $J = 11.7$  Hz), 95.38 (s), 67.48 (s), 58.25 (s), 56.61 (s), 52.73 (s), 51.33 (s), 49.67 (s), 34.84 (s), 12.93 (s).

HRMS (ESI-TOF,  $m/z$ ):  $[\text{M}+\text{H}]^+$  calculated for  $\text{C}_{25}\text{H}_{26}\text{N}_3\text{O}_5$  448.1872, found 448.1876

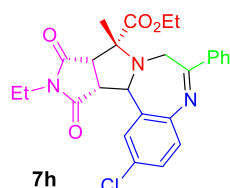

*ethyl (9R,9a*S*,12aR)-2-chloro-11-ethyl-9-methyl-10,12-dioxo-6-phenyl-7,9,9a,10,11,12,12a,12b-octahydrobenzo[*f*]pyrrolo[3',4':3,4]pyrrolo[1,2-*d*][1,4]diazepine-9-carboxylate (7h):*

White solid, 77% yield. MP: 155-157°C.

$^1\text{H}$  NMR (400 MHz,  $\text{cdcl}_3$ )  $\delta$  7.76 – 7.71 (m, 2H), 7.42 – 7.36 (m, 1H), 7.24 – 7.19 (m, 2H), 7.15 (dd,  $J = 8.4, 2.4$  Hz, 1H), 7.09 (d,  $J = 2.3$  Hz, 1H), 6.94 (d,  $J = 8.4$  Hz, 1H), 4.20 (d,  $J = 5.2$  Hz, 1H), 4.12 – 4.05 (m, 2H), 3.83 (d,  $J = 15.8$  Hz, 1H), 3.79 – 3.67 (m, 3H), 3.14 (d,  $J = 7.9$  Hz, 1H), 3.01 (dd,  $J = 7.8, 5.2$  Hz, 1H), 1.56 (s, 3H), 1.29 (t,  $J = 7.2$  Hz, 3H), 1.21 – 1.17 (m, 3H).

$^{13}\text{C}$  NMR (101 MHz,  $\text{cdcl}_3$ )  $\delta$  198.39 (s), 175.31 (s), 171.01 (s), 162.54 (s), 143.34 (s), 135.57 (s), 132.67 (s), 130.76 (s), 129.99 (s), 129.18 (s), 128.43 (s), 127.84 (s), 126.83 (s), 123.95 (s), 70.40 (s), 61.96 (s), 58.70 (s), 55.26 (s), 54.91 (s), 39.52 (s), 35.12 (s), 18.39 (s), 13.87 (s), 12.83 (s).

HRMS (ESI-TOF,  $m/z$ ):  $[\text{M}+\text{H}]^+$  calculated for  $\text{C}_{26}\text{H}_{27}\text{ClN}_3\text{O}_4$  480.1690, found 480.1687

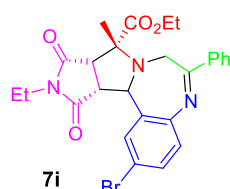

*ethyl (9R,9a*S*,12aR)-2-bromo-11-ethyl-9-methyl-10,12-dioxo-6-phenyl-7,9,9a,10,11,12,12a,12b-octahydrobenzo[*f*]pyrrolo[3',4':3,4]pyrrolo[1,2-*d*][1,4]diazepine-9-carboxylate (7i):*

White solid, 75% yield. MP: 160-162°C.

$^1\text{H}$  NMR (400 MHz,  $\text{cdcl}_3$ )  $\delta$  7.73 (dt,  $J = 8.5, 1.6$  Hz, 2H), 7.41 – 7.35 (m, 1H), 7.29 (dd,  $J = 8.4, 2.3$  Hz, 1H), 7.24 – 7.18 (m, 3H), 6.87 (d,  $J = 8.4$  Hz, 1H), 4.17 (d,  $J = 5.2$  Hz, 1H), 4.08 (qd,  $J = 7.2, 1.5$  Hz, 2H), 3.81 (d,  $J = 15.8$  Hz, 1H), 3.77 – 3.67 (m, 3H), 3.13 (d,  $J = 7.9$  Hz, 1H), 3.00 (dd,  $J = 7.8, 5.2$  Hz, 1H), 1.55 (s, 3H), 1.29 (t,  $J = 7.2$  Hz, 3H), 1.19 (t,  $J = 7.2$  Hz, 3H).

$^{13}\text{C}$  NMR (101 MHz,  $\text{cdcl}_3$ )  $\delta$  198.35 (s), 175.31 (s), 170.99 (s), 162.60 (s), 143.78 (s), 135.57 (s), 133.62 (s), 133.00 (s), 132.64 (s), 128.46 (s), 127.82 (s), 127.20 (s), 124.34 (s), 116.82 (s), 70.42 (s), 61.97 (s), 58.65 (s), 55.13 (d,  $J = 18.0$  Hz), 39.52 (s), 35.14 (s), 21.02 (s), 18.32 (s), 13.87 (s), 12.82 (s).

HRMS (ESI-TOF,  $m/z$ ):  $[\text{M}+\text{H}]^+$  calculated for  $\text{C}_{26}\text{H}_{27}\text{BrN}_3\text{O}_4$  524.1185, found 524.1189

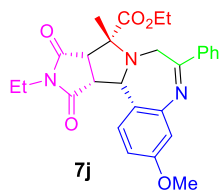

*ethyl (9R,9aS,12aR,12bS)-11-ethyl-3-methoxy-9-methyl-10,12-dioxo-6-phenyl-7,9,9a,10,11,12,12a,12b-octahydrobenzo[f]pyrrolo[3',4':3,4]pyrrolo[1,2-d][1,4]diazepine-9-carboxylate (7j):*

White solid, 67% yield. MP: 121-123°C.

$^1\text{H NMR}$  (400 MHz,  $\text{cdCl}_3$ )  $\delta$  7.69 (dd,  $J = 8.3, 1.3$  Hz, 2H), 7.37 – 7.31 (m, 1H), 7.16 (dd,  $J = 11.0, 4.7$  Hz, 2H), 6.95 (d,  $J = 8.2$  Hz, 1H), 6.55 – 6.48 (m, 2H), 4.06 (pd,  $J = 6.9, 3.3$  Hz, 3H), 3.77 – 3.66 (m, 7H), 3.09 (d,  $J = 7.9$  Hz, 1H), 2.98 (dd,  $J = 7.8, 5.2$  Hz, 1H), 1.53 (s, 3H), 1.29 (t,  $J = 7.2$  Hz, 3H), 1.17 (t,  $J = 7.2$  Hz, 3H).

$^{13}\text{C NMR}$  (101 MHz,  $\text{cdCl}_3$ )  $\delta$  221.18 (s), 198.37 (s), 175.56 (s), 171.21 (s), 162.82 (s), 161.18 (s), 145.93 (s), 135.56 (s), 132.46 (s), 131.65 (s), 128.48 (s), 127.47 (s), 114.35 (s), 110.81 (s), 110.14 (s), 70.23 (s), 61.84 (s), 58.82 (s), 55.60 (s), 55.23 (d,  $J = 19.2$  Hz), 40.08 (s), 35.03 (s), 17.80 (s), 13.86 (s), 12.89 (s).

HRMS (ESI-TOF,  $m/z$ ):  $[\text{M}+\text{H}]^+$  calculated for  $\text{C}_{27}\text{H}_{30}\text{N}_3\text{O}_5$  476.2185, found 476.2182

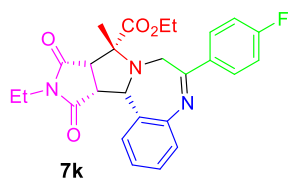

*ethyl (9R,9aS,12aR,12bS)-11-ethyl-6-(4-fluorophenyl)-9-methyl-10,12-dioxo-7,9,9a,10,11,12,12a,12b-octahydrobenzo[f]pyrrolo[3',4':3,4]pyrrolo[1,2-d][1,4]diazepine-9-carboxylate (7k):*

White solid, 74% yield. MP: 131-133°C.

$^1\text{H NMR}$  (400 MHz,  $\text{cdCl}_3$ )  $\delta$  7.77 – 7.70 (m, 2H), 7.15 (td,  $J = 7.6, 1.6$  Hz, 1H), 7.05 (dd,  $J = 7.4, 1.5$  Hz, 1H), 6.99 – 6.90 (m, 2H), 6.77 (t,  $J = 8.8$  Hz, 2H), 4.09 (qd,  $J = 7.2, 2.4$  Hz, 2H), 3.98 (d,  $J = 5.2$  Hz, 1H), 3.79 – 3.66 (m, 4H), 3.11 (d,  $J = 7.9$  Hz, 1H), 2.99 (dd,  $J = 7.9, 5.2$  Hz, 1H), 1.55 (s, 3H), 1.29 (t,  $J = 7.2$  Hz, 3H), 1.20 (t,  $J = 7.2$  Hz, 3H).

$^{19}\text{F NMR}$  (376 MHz,  $\text{cdCl}_3$ )  $\delta$  -106.01 (s).

$^{13}\text{C NMR}$  (101 MHz,  $\text{cdCl}_3$ )  $\delta$  196.51 (s), 175.35 (s), 171.16 (s), 166.43 (s), 163.91 (s), 162.09 (s), 144.72 (s), 131.98 (d,  $J = 2.9$  Hz), 131.57 – 131.14 (m), 130.31 (s), 125.56 (s), 124.08 (s), 121.99 (s), 114.56 (s), 114.35 (s), 70.45 (s), 61.97 (s), 59.74 (s), 56.47 (s), 55.09 (s), 39.55 (s), 35.09 (s), 17.36 (s), 13.90 (s), 12.88 (s).

HRMS (ESI-TOF,  $m/z$ ):  $[\text{M}+\text{H}]^+$  calculated for  $\text{C}_{26}\text{H}_{27}\text{FN}_3\text{O}_4$  464.1986, found 464.1989

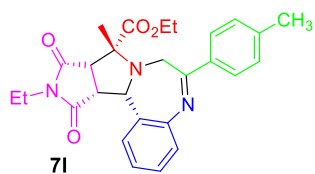

*ethyl (9R,9aS,12aR,12bS)-11-ethyl-9-methyl-10,12-dioxo-6-(p-tolyl)-7,9,9a,10,11,12,12a,12b-octahydrobenzo[f]pyrrolo[3',4':3,4]pyrrolo[1,2-d][1,4]diazepine-9-carboxylate (7l):*

White solid, 80% yield. MP: 127-129°C.

$^1\text{H}$  NMR (400 MHz,  $\text{cdCl}_3$ )  $\delta$  7.56 (d,  $J = 8.2$  Hz, 2H), 7.26 – 7.21 (m, 1H), 7.12 (dd,  $J = 7.6, 1.5$  Hz, 2H), 7.02 – 6.96 (m, 3H), 4.27 (d,  $J = 5.2$  Hz, 1H), 4.06 – 3.96 (m, 2H), 3.83 (d,  $J = 15.8$  Hz, 1H), 3.80 – 3.69 (m, 2H), 3.66 (d,  $J = 15.8$  Hz, 1H), 3.12 (d,  $J = 7.9$  Hz, 1H), 3.03 (dd,  $J = 7.9, 5.2$  Hz, 1H), 2.30 (s, 3H), 1.55 (s, 3H), 1.29 (t,  $J = 7.2$  Hz, 3H), 1.11 (t,  $J = 7.2$  Hz, 3H).

$^{13}\text{C}$  NMR (101 MHz,  $\text{cdCl}_3$ )  $\delta$  198.03 (s), 175.58 (s), 171.19 (s), 162.39 (s), 144.74 (s), 143.33 (s), 133.21 (s), 130.93 (s), 130.10 (s), 128.49 (s), 125.83 (s), 124.24 (s), 122.61 (s), 70.18 (s), 61.75 (s), 58.84 (s), 55.55 (s), 54.21 (s), 39.74 (s), 34.98 (s), 21.60 (s), 18.55 (s), 13.79 (s), 12.89 (s).

HRMS (ESI-TOF,  $m/z$ ):  $[\text{M}+\text{H}]^+$  calculated for  $\text{C}_{27}\text{H}_{30}\text{N}_3\text{O}_4$  460.2236, found 460.2232

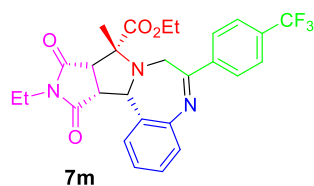

*ethyl (9R,9aS,12aR,12bS)-11-ethyl-9-methyl-10,12-dioxo-6-(4-(trifluoromethyl)phenyl)-7,9,9a,10,11,12,12a,12b-octahydrobenzo[f]pyrrolo[3',4':3,4]pyrrolo[1,2-d][1,4]diazepine-9-carboxylate (7m):*

Gray solid, 63% yield. MP: 112-114°C.

$^1\text{H}$  NMR (400 MHz,  $\text{cdCl}_3$ )  $\delta$  7.79 (dd,  $J = 8.7, 0.7$  Hz, 2H), 7.40 – 7.34 (m, 2H), 7.18 – 7.12 (m, 1H), 7.04 (dd,  $J = 7.4, 1.7$  Hz, 1H), 6.98 (td,  $J = 7.4, 1.3$  Hz, 1H), 6.87 (dd,  $J = 7.8, 1.2$  Hz, 1H), 4.17 – 4.07 (m, 2H), 3.96 (d,  $J = 5.2$  Hz, 1H), 3.80 – 3.67 (m, 4H), 3.13 (d,  $J = 7.9$  Hz, 1H), 3.00 (dd,  $J = 7.9, 5.2$  Hz, 1H), 1.58 (s, 3H), 1.29 (t,  $J = 7.2$  Hz, 3H), 1.23 (t,  $J = 7.2$  Hz, 3H).

$^{19}\text{F}$  NMR (376 MHz,  $\text{cdCl}_3$ )  $\delta$  -63.20 (s).

$^{13}\text{C}$  NMR (101 MHz,  $\text{cdCl}_3$ )  $\delta$  197.35 (s), 175.25 (s), 171.12 (s), 161.98 (s), 144.75 (s), 137.96 (s), 133.40 (s), 133.08 (s), 131.24 (s), 130.50 (s), 128.94 (s), 125.70 (s), 124.29 (dd,  $J = 13.6, 9.8$  Hz), 121.77 (s), 70.43 (s), 62.08 (s), 59.88 (s), 56.75 (s), 55.03 (s), 39.45 (s), 35.16 (s), 17.22 (s), 13.91 (s), 12.84 (s).

HRMS (ESI-TOF,  $m/z$ ):  $[\text{M}+\text{H}]^+$  calculated for  $\text{C}_{27}\text{H}_{27}\text{F}_3\text{N}_3\text{O}_4$  514.1954, found 514.1958

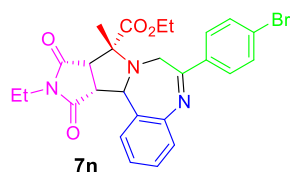

*ethyl (9R,9aS,12aR)-6-(4-bromophenyl)-11-ethyl-9-methyl-10,12-dioxo-7,9,9a,10,11,12,12a,12b-octahydrobenzo[f]pyrrolo[3',4':3,4]pyrrolo[1,2-d][1,4]diazepine-9-carboxylate (7n):*

Canary yellow solid, 75% yield. MP: 144-146°C.

$^1\text{H}$  NMR (400 MHz,  $\text{cdCl}_3$ )  $\delta$  7.59 – 7.54 (m, 2H), 7.28 – 7.24 (m, 2H), 7.20 – 7.16 (m, 1H), 7.05 (dd,  $J = 7.7, 1.6$  Hz, 1H), 6.98 (ddd,  $J = 7.9, 5.2, 1.3$  Hz, 2H), 4.12 – 4.04 (m, 2H), 3.99 (d,  $J = 5.2$  Hz, 1H), 3.81 – 3.73 (m, 2H), 3.72 – 3.64 (m, 2H), 3.12 (d,  $J = 7.9$  Hz, 1H), 3.01 (dd,  $J = 7.9, 5.2$  Hz, 1H), 1.56 (s, 3H), 1.30 (t,  $J = 7.2$  Hz, 3H), 1.20 (t,  $J = 7.2$  Hz, 3H).

$^{13}\text{C}$  NMR (101 MHz,  $\text{cdCl}_3$ )  $\delta$  197.09 (s), 175.33 (s), 171.10 (s), 162.09 (s), 144.73 (s), 134.20 (s), 131.54 (s), 131.23 (s), 130.74 (s), 130.34 (d,  $J = 17.6$  Hz), 129.68 (s), 127.51 (s), 125.70 (s), 124.13 (s), 121.98 (s), 70.37 (s), 61.99 (s), 59.76 (s), 56.32 (s), 55.13 (s), 39.55 (s), 35.13 (s), 17.38 (s), 13.90 (s).



12.90 (s).

HRMS (ESI-TOF,  $m/z$ ):  $[M+H]^+$  calculated for  $C_{26}H_{27}BrN_3O_4$  524.1185, found 524.1182

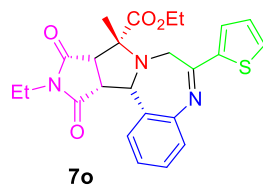

*ethyl (9R,9aS,12aR,12bS)-11-ethyl-9-methyl-10,12-dioxo-6-(thiophen-2-yl)-7,9,9a,10,11,12,12a,12b-octahydrobenzo[f]pyrrolo[3',4':3,4]pyrrolo[1,2-d][1,4]diazepine-9-carboxylate (7o):*

Brownish yellow solid, 64% yield. MP: 102-104.5°C.

$^1H$  NMR (400 MHz,  $cdCl_3$ )  $\delta$  7.98 (dd,  $J = 3.8, 1.1$  Hz, 1H), 7.37 (dd,  $J = 4.9, 1.1$  Hz, 1H), 7.19 – 7.11 (m, 2H), 6.98 (ddd,  $J = 7.3, 6.1, 1.4$  Hz, 2H), 6.88 (dd,  $J = 4.9, 3.8$  Hz, 1H), 4.15 – 4.07 (m, 3H), 3.77 (dddd,  $J = 14.3, 10.9, 7.1, 3.5$  Hz, 2H), 3.65 (s, 2H), 3.12 (d,  $J = 7.9$  Hz, 1H), 3.02 (dd,  $J = 7.9, 5.2$  Hz, 1H), 1.54 (s, 3H), 1.33 (t,  $J = 7.2$  Hz, 3H), 1.22 (t,  $J = 7.2$  Hz, 3H).

$^{13}C$  NMR (101 MHz,  $cdCl_3$ )  $\delta$  191.11 (s), 175.42 (s), 171.21 (s), 162.07 (s), 144.46 (s), 142.41 (s), 134.38 (s), 133.21 (s), 131.01 (s), 130.24 (s), 127.53 (s), 125.45 (s), 124.31 (s), 122.17 (s), 70.55 (s), 62.01 (s), 59.60 (s), 56.41 (s), 55.16 (s), 39.67 (s), 35.12 (s), 17.98 (s), 13.97 (s), 12.90 (s).

HRMS (ESI-TOF,  $m/z$ ):  $[M+H]^+$  calculated for  $C_{24}H_{26}N_3O_4S$  452.1644, found 452.1650

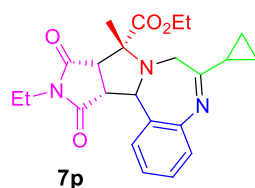

*ethyl (9R,9aS,12aR)-6-cyclopropyl-11-ethyl-9-methyl-10,12-dioxo-7,9,9a,10,11,12,12a,12b-octahydrobenzo[f]pyrrolo[3',4':3,4]pyrrolo[1,2-d][1,4]diazepine-9-carboxylate (7p):*

White solid, 74% yield. MP: 115-117°C.

$^1H$  NMR (400 MHz,  $cdCl_3$ )  $\delta$  7.37 – 7.31 (m, 2H), 7.09 (dd,  $J = 7.4, 0.5$  Hz, 1H), 7.05 – 7.00 (m, 1H), 4.25 – 4.15 (m, 1H), 4.09 – 4.01 (m, 1H), 3.87 (d,  $J = 5.3$  Hz, 1H), 3.81 – 3.73 (m, 2H), 3.22 – 3.12 (m, 3H), 3.06 (dd,  $J = 7.9, 5.3$  Hz, 1H), 2.25 – 2.17 (m, 1H), 1.50 (s, 3H), 1.29 – 1.18 (m, 6H), 0.71 – 0.63 (m, 1H), 0.55 – 0.46 (m, 1H), 0.19 (tdd,  $J = 8.2, 6.3, 4.1$  Hz, 1H), -0.09 – -0.18 (m, 1H).

$^{13}C$  NMR (101 MHz,  $cdCl_3$ )  $\delta$  210.75 (s), 175.36 (s), 171.12 (s), 162.39 (s), 145.12 (s), 130.86 (s), 130.25 (s), 125.96 (s), 124.55 (s), 122.41 (s), 70.72 (s), 61.81 (s), 60.17 (s), 58.65 (s), 54.79 (s), 39.61 (s), 35.06 (s), 17.53 (s), 16.73 (s), 14.01 (s), 12.73 (s), 11.71 (s), 11.29 (s).

HRMS (ESI-TOF,  $m/z$ ):  $[M+H]^+$  calculated for  $C_{23}H_{28}N_3O_4$  410.2080, found 410.2083

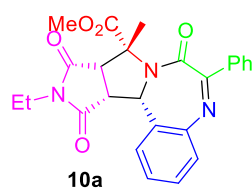

*methyl (9R,9aS,12aR,12bS)-11-ethyl-9-methyl-7,10,12-trioxo-6-phenyl-7,9,9a,10,11,12,12a,12b-octahydrobenzo[f]pyrrolo[3',4':3,4]pyrrolo[1,2-d][1,4]diazepine-9-carboxylate (10a):*

White solid, 84% yield. MP: 154-156°C.

<sup>1</sup>H NMR (400 MHz, cdcl<sub>3</sub>) δ 8.38 (s, 1H), 7.90 – 7.81 (m, 2H), 7.67 (ddd, *J* = 8.4, 7.0, 1.4 Hz, 1H), 7.44 (ddd, *J* = 8.1, 7.0, 1.2 Hz, 1H), 7.20 (s, 1H), 7.17 – 7.12 (m, 1H), 7.05 – 6.97 (m, 4H), 4.82 (s, 1H), 3.54 (s, 3H), 3.44 (qd, *J* = 13.4, 7.1 Hz, 2H), 1.86 (s, 3H), 0.58 (t, *J* = 7.2 Hz, 3H).

<sup>13</sup>C NMR (101 MHz, cdcl<sub>3</sub>) δ 174.12 (s), 173.15 (s), 172.07 (s), 156.04 (s), 147.23 (s), 136.48 (s), 135.17 (s), 132.11 (s), 130.00 (s), 128.59 (dd, *J* = 25.8, 8.0 Hz), 127.89 – 127.32 (m), 125.70 (s), 124.56 (s), 118.72 (s), 81.50 (s), 65.32 (s), 63.34 (s), 52.73 (s), 33.60 (s), 25.53 (s), 11.89 (s).

HRMS (ESI-TOF, *m/z*): [M+H]<sup>+</sup> calculated for C<sub>25</sub>H<sub>24</sub>N<sub>3</sub>O<sub>5</sub> 446.1716, found 446.1715

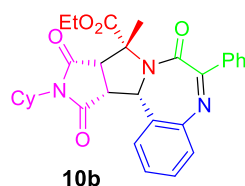

*ethyl (9R,9aS,12aR,12bS)-11-cyclohexyl-9-methyl-7,10,12-trioxo-6-phenyl-7,9,9a,10,11,12,12a,12b-octahydrobenzo[f]pyrrolo[3',4':3,4]pyrrolo[1,2-d][1,4]diazepine-9-carboxylate (10b):*

White solid, 83% yield. MP: 162-164°C.

<sup>1</sup>H NMR (400 MHz, cdcl<sub>3</sub>) δ 8.37 (s, 1H), 7.92 – 7.80 (m, 2H), 7.70 – 7.62 (m, 1H), 7.42 (ddd, *J* = 8.1, 7.1, 1.1 Hz, 1H), 7.26 (d, *J* = 2.3 Hz, 1H), 7.14 (ddd, *J* = 8.6, 3.8, 1.8 Hz, 1H), 7.03 – 6.90 (m, 4H), 5.17 (s, 1H), 4.23 – 4.13 (m, 1H), 4.00 – 3.84 (m, 2H), 1.96 (dt, *J* = 12.2, 8.8 Hz, 2H), 1.84 (s, 3H), 1.71 – 1.51 (m, 3H), 1.26 – 1.02 (m, 7H), 0.69 (d, *J* = 12.1 Hz, 1H).

<sup>13</sup>C NMR (101 MHz, cdcl<sub>3</sub>) δ 174.23 (s), 173.42 (s), 171.67 (s), 156.41 (s), 147.07 (s), 136.27 (s), 135.37 (s), 129.77 (s), 128.55 (d, *J* = 15.1 Hz), 127.73 (d, *J* = 5.2 Hz), 127.40 (s), 125.40 (s), 124.42 (s), 118.77 (s), 81.54 (s), 65.35 (s), 62.91 (s), 62.06 (s), 51.44 (s), 27.90 (s), 27.53 (s), 25.86 – 25.29 (m), 25.09 (s), 13.83 (s).

HRMS (ESI-TOF, *m/z*): [M+H]<sup>+</sup> calculated for C<sub>30</sub>H<sub>32</sub>N<sub>3</sub>O<sub>5</sub> 514.2342, found 514.2345

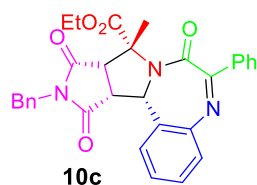

*ethyl (9R,9aS,12aR,12bS)-11-benzyl-9-methyl-7,10,12-trioxo-6-phenyl-7,9,9a,10,11,12,12a,12b-octahydrobenzo[f]pyrrolo[3',4':3,4]pyrrolo[1,2-d][1,4]diazepine-9-carboxylate (10c):*

White solid, 83% yield. MP: 149-151°C.

<sup>1</sup>H NMR (400 MHz, cdcl<sub>3</sub>) δ 8.43 (s, 1H), 7.91 – 7.83 (m, 2H), 7.67 (ddd, *J* = 8.5, 7.0, 1.5 Hz, 1H), 7.48 – 7.42 (m, 1H), 7.19 (s, 1H), 7.12 – 7.04 (m, 4H), 7.03 – 6.98 (m, 2H), 6.97 – 6.88 (m, 4H), 4.94 (s, 1H), 4.61 (d, *J* = 14.5 Hz, 1H), 4.52 (d, *J* = 14.5 Hz, 1H), 3.98 – 3.90 (m, 1H), 3.75 – 3.66 (m, 1H), 1.84 (s, 3H), 0.92 (t, *J* = 7.1 Hz, 3H).

<sup>13</sup>C NMR (101 MHz, cdcl<sub>3</sub>) δ 174.16 (s), 173.20 (s), 171.46 (s), 156.03 (s), 147.21 (s), 136.56 (s), 135.66 (s), 135.00 (s), 129.93 (s), 128.75 (d, *J* = 10.7 Hz), 128.20 (d, *J* = 3.0 Hz), 127.94 (s), 127.50 (d, *J* = 7.3 Hz), 127.03 (s), 125.85 (s), 124.62 (s), 118.75 (s), 81.65 (s), 65.38 (s), 63.40 (s), 62.02 (s), 42.44 (s), 25.59 (s), 13.66 (s).

HRMS (ESI-TOF, *m/z*): [M+H]<sup>+</sup> calculated for C<sub>31</sub>H<sub>28</sub>N<sub>3</sub>O<sub>5</sub> 522.2029, found 522.2026

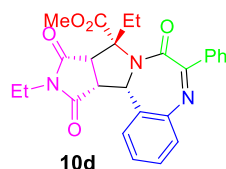

*methyl (9R,9aS,12aR,12bS)-9,11-diethyl-7,10,12-trioxo-6-phenyl-7,9,9a,10,11,12,12a,12b-octahydrobenzo[f]pyrrolo[3',4':3,4]pyrrolo[1,2-d][1,4]diazepine-9-carboxylate (10d):*

White solid, 80% yield. MP: 145-147°C.

<sup>1</sup>H NMR (400 MHz, cdcl<sub>3</sub>) δ 8.39 (s, 1H), 7.86 (d, *J* = 8.4 Hz, 2H), 7.67 (ddd, *J* = 8.3, 7.0, 1.5 Hz, 1H), 7.46 (ddd, *J* = 8.2, 7.1, 1.1 Hz, 1H), 7.30 (s, 1H), 7.18 – 7.11 (m, 1H), 7.01 (dt, *J* = 8.7, 4.8 Hz, 4H), 4.25 (s, 1H), 3.55 (s, 3H), 3.49 – 3.37 (m, 2H), 2.71 (dd, *J* = 13.2, 7.5 Hz, 1H), 2.04 – 1.96 (m, 1H), 0.94 (t, *J* = 7.5 Hz, 3H), 0.57 (t, *J* = 7.2 Hz, 3H).

<sup>13</sup>C NMR (101 MHz, cdcl<sub>3</sub>) δ 173.94 (s), 173.33 (s), 170.81 (s), 156.00 (s), 147.21 (s), 137.00 (s), 135.13 (s), 130.06 (s), 128.76 (d, *J* = 2.4 Hz), 127.75 – 127.36 (m), 125.64 (s), 124.58 (s), 118.48 (s), 81.16 (s), 68.77 (s), 64.13 (s), 52.51 (s), 33.62 (s), 30.98 (s), 11.87 (s), 8.51 (s).

HRMS (ESI-TOF, *m/z*): [M+H]<sup>+</sup> calculated for C<sub>26</sub>H<sub>26</sub>N<sub>3</sub>O<sub>5</sub> 460.1872, found 460.1875

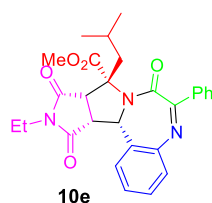

*methyl (9R,9aS,12aR,12bS)-11-ethyl-9-isobutyl-7,10,12-trioxo-6-phenyl-7,9,9a,10,11,12,12a,12b-octahydrobenzo[f]pyrrolo[3',4':3,4]pyrrolo[1,2-d][1,4]diazepine-9-carboxylate (10e):*

White solid, 77% yield. MP: 160-162.5°C.

<sup>1</sup>H NMR (400 MHz, cdcl<sub>3</sub>) δ 8.44 (s, 1H), 7.90 (dd, *J* = 14.9, 7.8 Hz, 2H), 7.72 – 7.66 (m, 1H), 7.51 – 7.45 (m, 1H), 7.34 (s, 1H), 7.12 (dd, *J* = 9.8, 4.3 Hz, 1H), 7.05 – 6.97 (m, 4H), 4.79 (s, 1H), 3.54 (s, 3H), 3.47 – 3.38 (m, 2H), 2.70 (dd, *J* = 13.5, 5.6 Hz, 1H), 1.92 (dd, *J* = 13.5, 6.4 Hz, 1H), 1.69 (dt, *J* = 12.9, 6.4 Hz, 1H), 1.07 (d, *J* = 6.6 Hz, 3H), 0.81 (d, *J* = 6.6 Hz, 3H), 0.58 (t, *J* = 7.1 Hz, 3H).

<sup>13</sup>C NMR (101 MHz, cdcl<sub>3</sub>) δ 173.85 (s), 173.44 (s), 171.40 (s), 156.00 (s), 147.18 (s), 137.28 (s), 135.20 (s), 130.09 (s), 128.87 (s), 128.65 (s), 127.60 (dd, *J* = 24.8, 16.1 Hz), 125.67 (s), 124.56 (s), 118.59 (s), 81.01 (s), 67.83 (s), 64.83 (s), 52.48 (s), 50.63 (s), 46.32 (s), 33.62 (s), 24.70 (s), 24.25 (s), 23.32 (s), 11.89 (s).

HRMS (ESI-TOF, *m/z*): [M+H]<sup>+</sup> calculated for C<sub>28</sub>H<sub>30</sub>N<sub>3</sub>O<sub>5</sub> 488.2185, found 488.2187

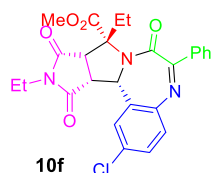

*methyl (9R,9aS,12aR,12bS)-2-chloro-9,11-diethyl-7,10,12-trioxo-6-phenyl-7,9,9a,10,11,12,12a,12b-octahydrobenzo[f]pyrrolo[3',4':3,4]pyrrolo[1,2-d][1,4]diazepine-9-carboxylate (10f):*

White solid, 70% yield. MP: 173-175°C.

<sup>1</sup>H NMR (400 MHz, cdcl<sub>3</sub>) δ 8.31 (d, *J* = 3.1 Hz, 1H), 7.86 (d, *J* = 2.5 Hz, 1H), 7.83 – 7.78 (m, 1H),

7.60 (dd,  $J = 8.9, 2.5$  Hz, 1H), 7.52 (s, 1H), 7.16 (dd,  $J = 10.3, 4.3$  Hz, 1H), 7.04 (dd,  $J = 9.6, 5.9$  Hz, 2H), 6.98 (d,  $J = 7.4$  Hz, 2H), 5.03 (s, 1H), 3.57 (s, 3H), 3.48 – 3.41 (m, 2H), 2.73 – 2.63 (m, 1H), 2.03 – 1.93 (m, 1H), 0.94 (t,  $J = 7.5$  Hz, 3H), 0.57 (t,  $J = 7.1$  Hz, 3H).

$^{13}\text{C}$  NMR (101 MHz,  $\text{cdCl}_3$ )  $\delta$  173.87 (s), 173.59 (s), 170.82 (s), 156.23 (s), 145.61 (s), 136.02 (s), 135.10 (s), 130.59 (s), 129.92 (s), 129.09 (s), 128.76 (s), 127.46 (d,  $J = 8.2$  Hz), 126.30 (s), 119.67 (s), 81.12 (s), 68.91 (s), 64.21 (s), 52.57 (s), 50.70 (s), 33.69 (s), 30.97 (s), 11.84 (s), 8.54 (s).

HRMS (ESI-TOF,  $m/z$ ):  $[\text{M}+\text{H}]^+$  calculated for  $\text{C}_{26}\text{H}_{25}\text{ClN}_3\text{O}_5$  494.1483, found 494.1488

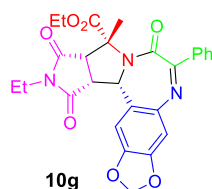

*ethyl (9R,9aS,12aR,12bS)-11-ethyl-9-methyl-7,10,12-trioxo-6-phenyl-7,9,9a,10,11,12,12a,12b-octahydro-[1,3]dioxolo[4',5':4,5]benzo[1,2-f]pyrrolo[3',4':3,4]pyrrolo[1,2-d][1,4]diazepine-9-carboxylate (10g):*

White solid, 62% yield. MP: 151-153°C.

$^1\text{H}$  NMR (400 MHz,  $\text{cdCl}_3$ )  $\delta$  8.23 (s, 1H), 7.22 (s, 1H), 7.17 – 7.13 (m, 2H), 7.11 (s, 1H), 7.05 (t,  $J = 7.8$  Hz, 2H), 7.02 – 6.98 (m, 2H), 6.10 (dd,  $J = 2.6, 1.2$  Hz, 2H), 4.63 (s, 1H), 4.12 – 4.06 (m, 1H), 3.96 (dd,  $J = 10.7, 7.1$  Hz, 1H), 3.47 – 3.37 (m, 2H), 1.86 (s, 3H), 1.05 (t,  $J = 7.1$  Hz, 3H), 0.47 (t,  $J = 7.2$  Hz, 3H).

$^{13}\text{C}$  NMR (101 MHz,  $\text{cdCl}_3$ )  $\delta$  173.91 (s), 173.13 (s), 171.65 (s), 154.97 (s), 150.76 (s), 146.07 (s), 145.21 (s), 135.37 (d,  $J = 9.7$  Hz), 128.63 (s), 127.52 (d,  $J = 17.4$  Hz), 121.55 (s), 116.31 (s), 105.37 (s), 104.50 (s), 101.68 (s), 81.56 (s), 65.04 (s), 63.46 (s), 61.92 (s), 33.46 (s), 25.61 (s), 13.73 (s), 12.42 (s), 11.84 (s).

HRMS (ESI-TOF,  $m/z$ ):  $[\text{M}+\text{H}]^+$  calculated for  $\text{C}_{27}\text{H}_{26}\text{N}_3\text{O}_7$  504.1771, found 504.1766

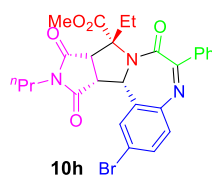

*methyl (9R,9aS,12aR,12bS)-2-bromo-9-ethyl-7,10,12-trioxo-6-phenyl-11-propyl-7,9,9a,10,11,12,12a,12b-octahydrobenzo[f]pyrrolo[3',4':3,4]pyrrolo[1,2-d][1,4]diazepine-9-carboxylate (10h):*

White solid, 72% yield. MP: 145-147°C.

$^1\text{H}$  NMR (400 MHz,  $\text{cdCl}_3$ )  $\delta$  8.33 (s, 1H), 8.03 (s, 1H), 7.73 (s, 3H), 7.15 (dd,  $J = 11.4, 4.2$  Hz, 1H), 7.05 (t,  $J = 7.7$  Hz, 2H), 7.01 – 6.97 (m, 2H), 5.47 (s, 1H), 3.57 (s, 3H), 3.33 – 3.26 (m, 2H), 2.73 – 2.64 (m, 1H), 1.96 (td,  $J = 14.7, 7.2$  Hz, 1H), 1.10 – 0.98 (m, 2H), 0.93 (d,  $J = 7.5$  Hz, 3H), 0.59 (t,  $J = 7.4$  Hz, 3H).

$^{13}\text{C}$  NMR (101 MHz,  $\text{cdCl}_3$ )  $\delta$  174.19 (s), 173.84 (s), 170.86 (s), 156.72 (s), 145.87 (s), 135.92 (s), 135.20 (s), 133.11 (s), 130.74 (s), 129.31 (s), 128.69 (s), 127.45 (d,  $J = 14.5$  Hz), 126.86 (s), 119.64 (s), 117.66 (s), 81.14 (s), 69.10 (s), 64.26 (s), 52.56 (s), 50.48 (s), 40.53 (s), 30.98 (s), 20.17 (s), 11.05 (s), 8.53 (s).

HRMS (ESI-TOF,  $m/z$ ):  $[\text{M}+\text{H}]^+$  calculated for  $\text{C}_{27}\text{H}_{27}\text{BrN}_3\text{O}_5$  552.1134, found 552.1130

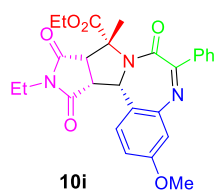

*ethyl (9R,9aS,12aR,12bS)-11-ethyl-3-methoxy-9-methyl-7,10,12-trioxo-6-phenyl-7,9,9a,10,11,12,12a,12b-octahydrobenzo[f]pyrrolo[3',4':3,4]pyrrolo[1,2-d][1,4]diazepine-9-carboxylate (10i):*

White solid, 67% yield. MP: 148-150°C.

$^1\text{H}$  NMR (400 MHz,  $\text{cdCl}_3$ )  $\delta$  8.30 (s, 1H), 7.72 (d,  $J = 8.9$  Hz, 1H), 7.25 – 7.24 (m, 1H), 7.17 – 7.12 (m, 1H), 7.11 – 6.94 (m, 6H), 4.61 (s, 1H), 4.10 – 4.04 (m, 1H), 3.98 – 3.94 (m, 1H), 3.93 (s, 3H), 3.51 – 3.37 (m, 2H), 1.86 (s, 3H), 1.04 (t,  $J = 7.1$  Hz, 3H), 0.48 (t,  $J = 7.1$  Hz, 3H).

$^{13}\text{C}$  NMR (101 MHz,  $\text{cdCl}_3$ )  $\delta$  174.17 (s), 173.07 (s), 171.62 (s), 161.29 (s), 156.56 (s), 149.09 (s), 136.10 (s), 135.32 (s), 129.67 (s), 128.64 (s), 127.53 (d,  $J = 16.3$  Hz), 120.41 (s), 116.54 (s), 116.02 (s), 107.10 (s), 81.54 (s), 65.05 (s), 63.30 (s), 61.91 (s), 55.54 (s), 33.52 (s), 25.60 (s), 13.72 (s), 11.83 (s).

HRMS (ESI-TOF,  $m/z$ ):  $[\text{M}+\text{H}]^+$  calculated for  $\text{C}_{27}\text{H}_{28}\text{N}_3\text{O}_6$  490.1978, found 490.1974

#### 4. NMR spectra of products 6a, 7 and 10

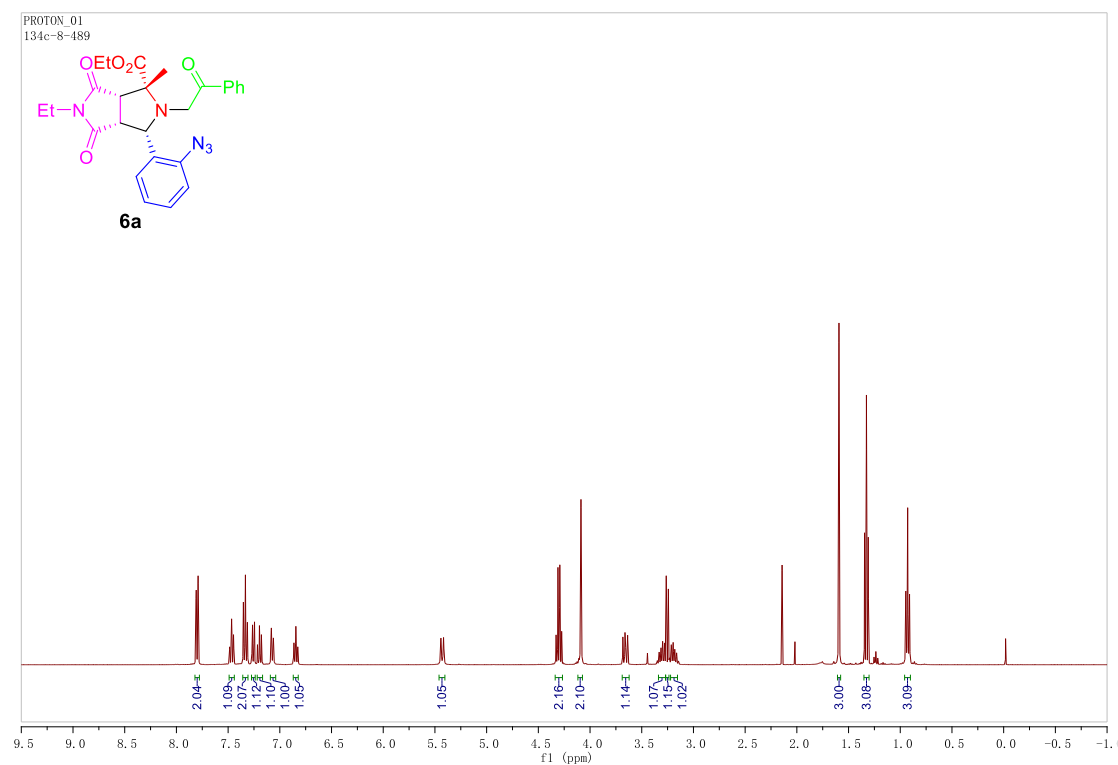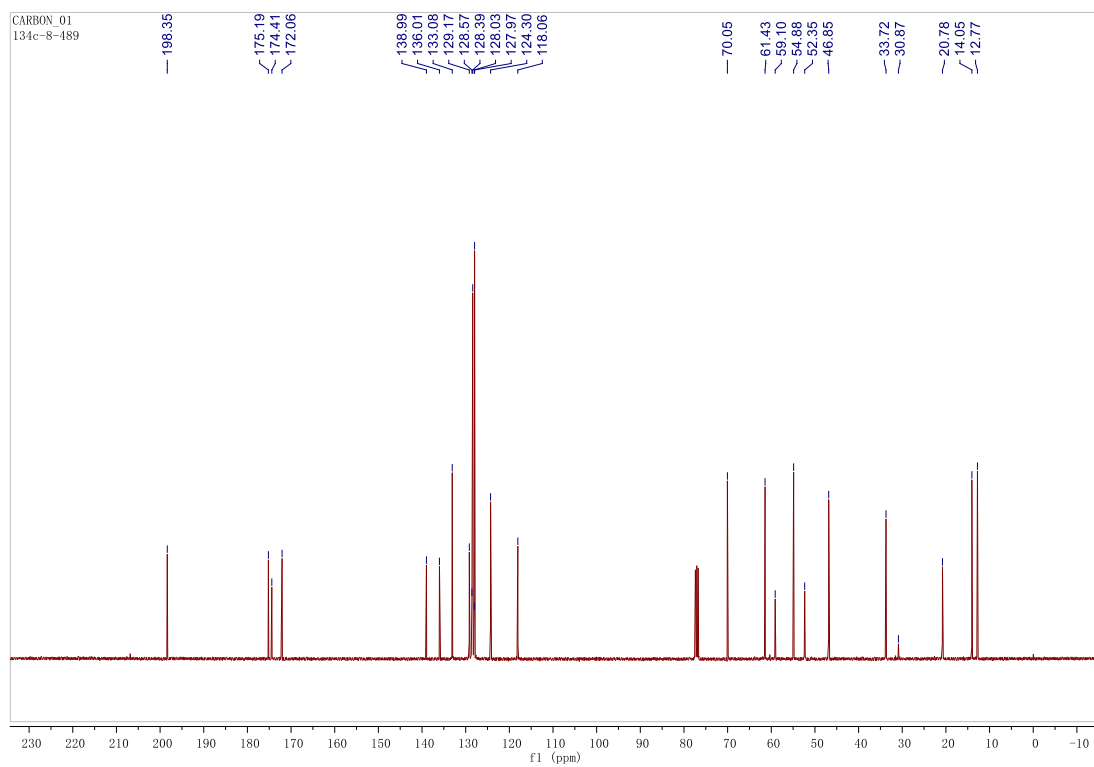

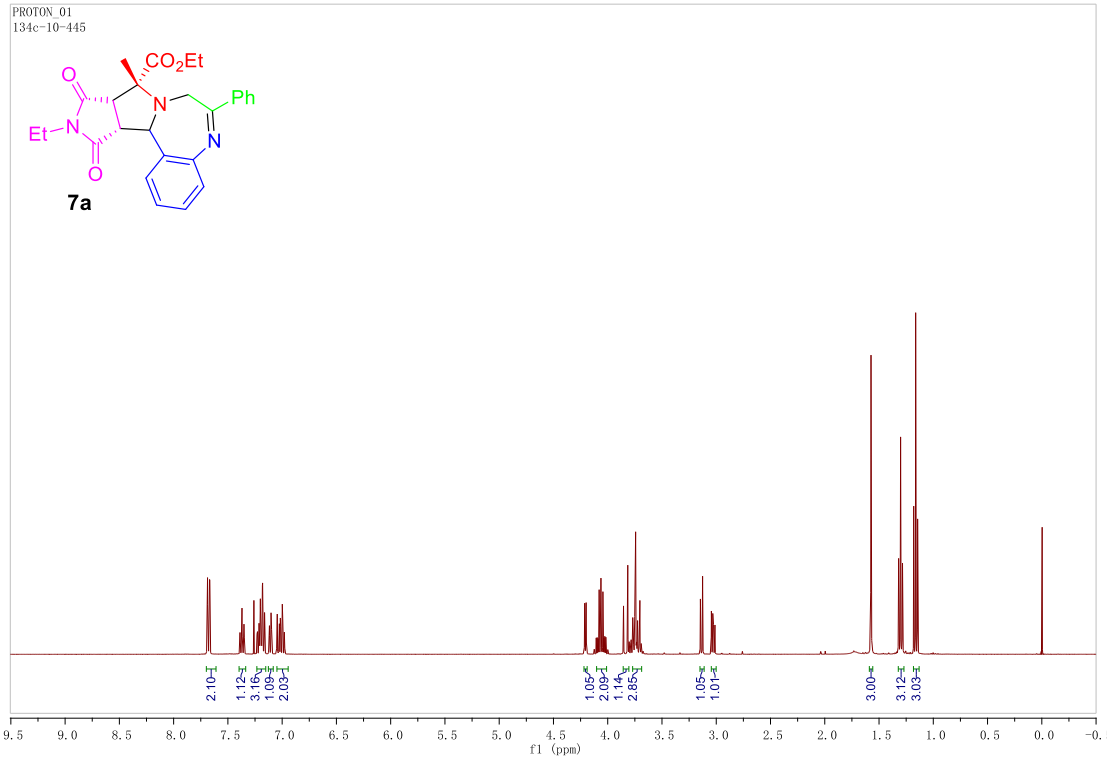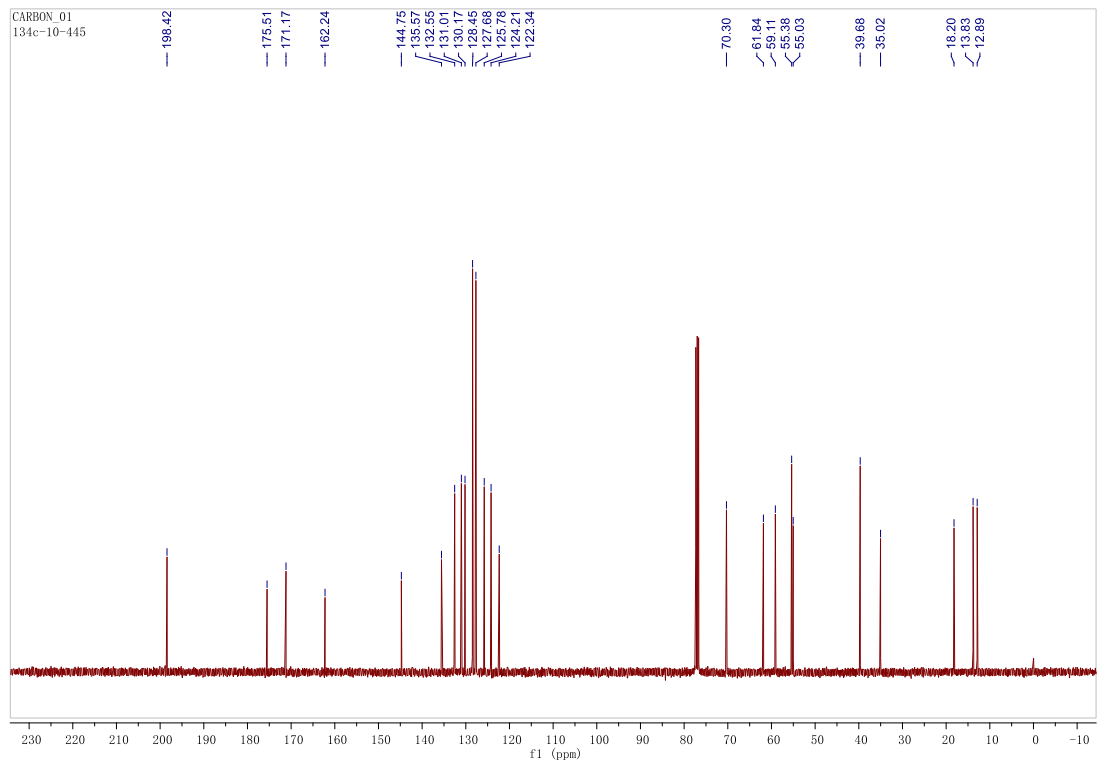

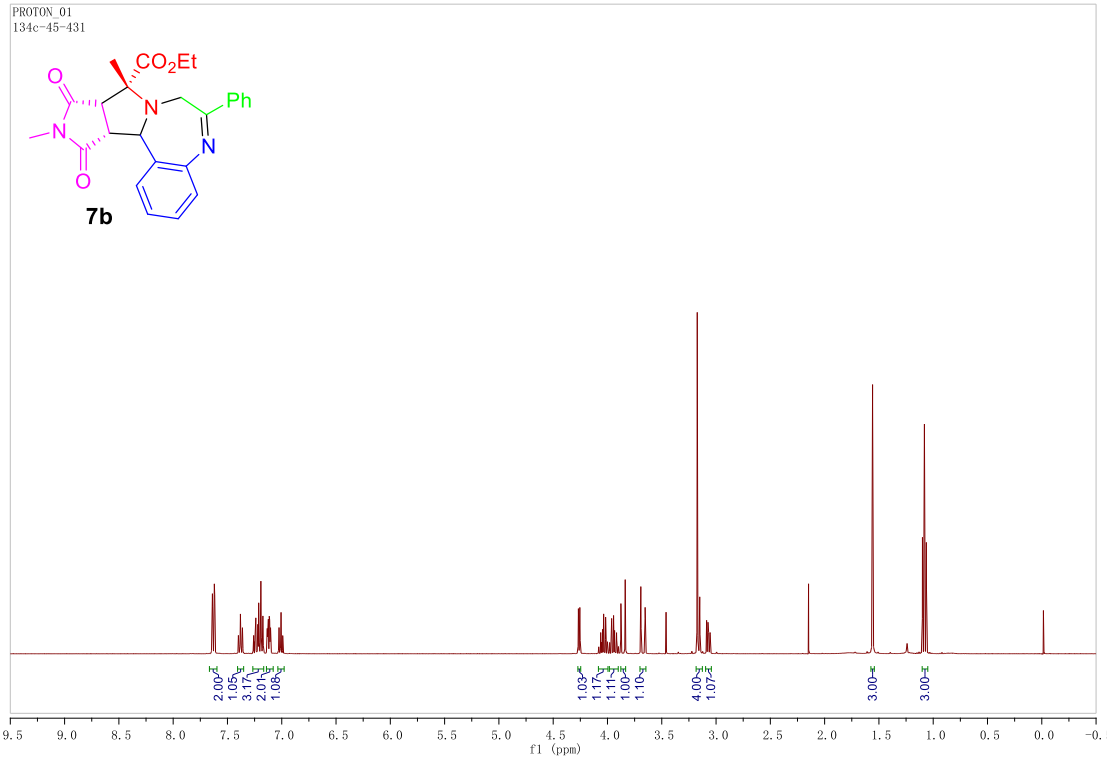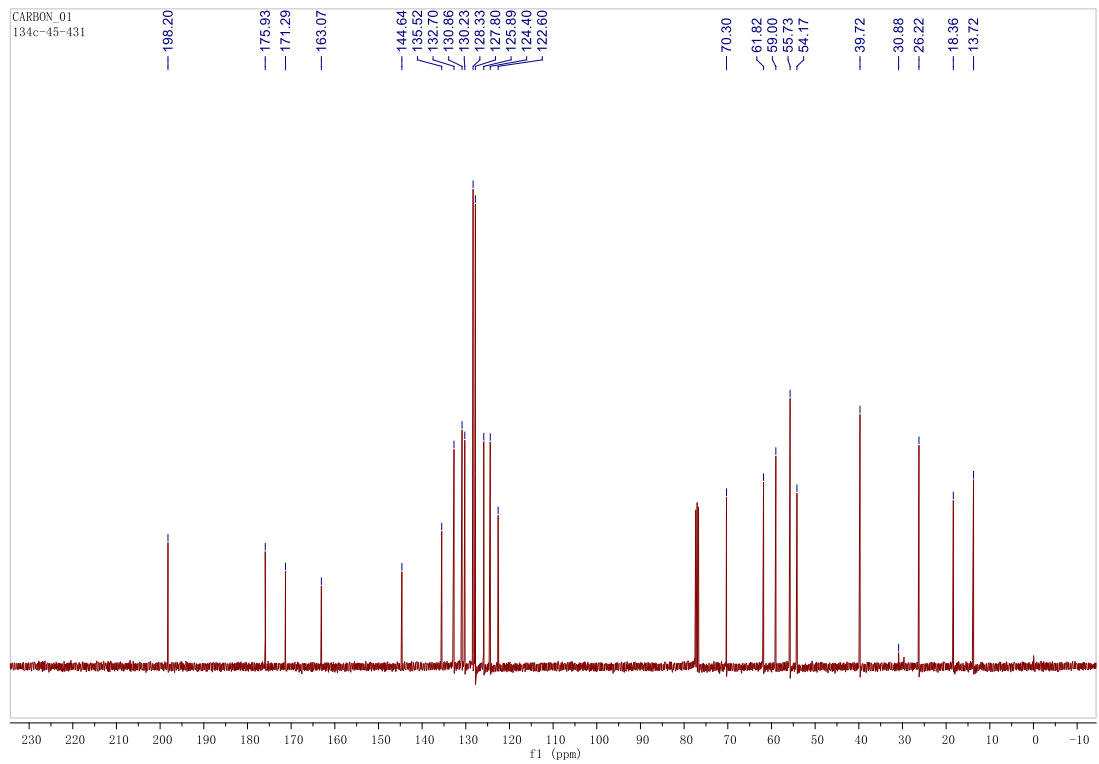



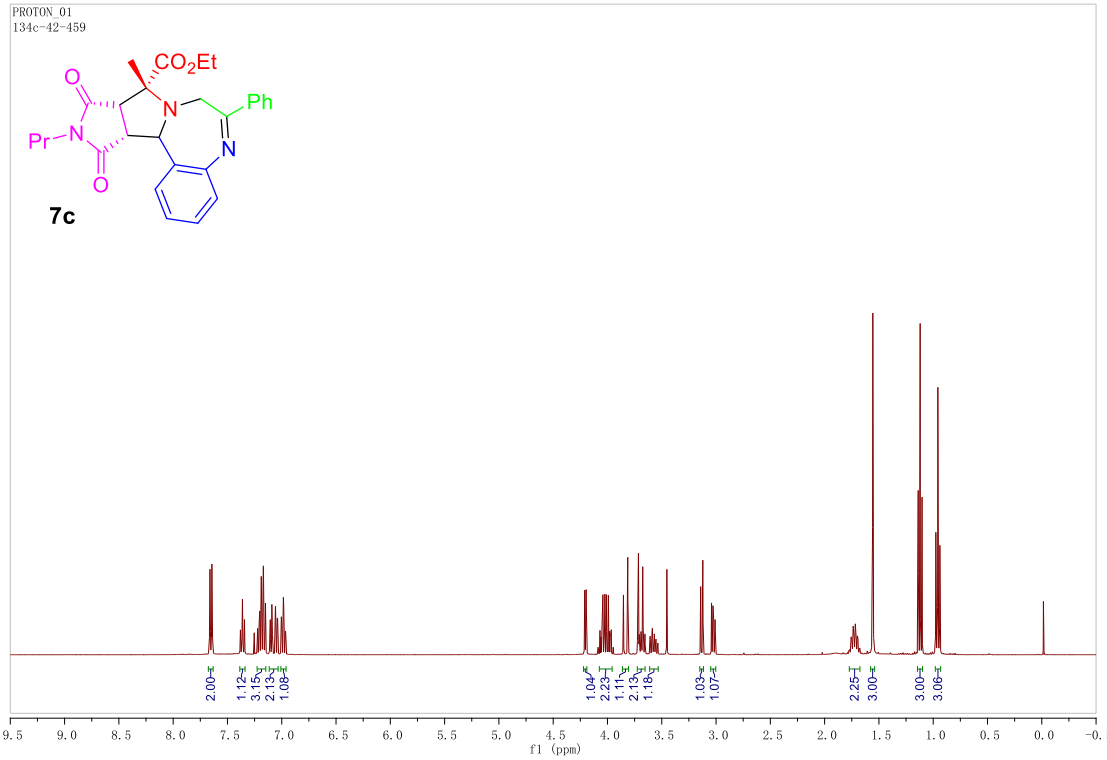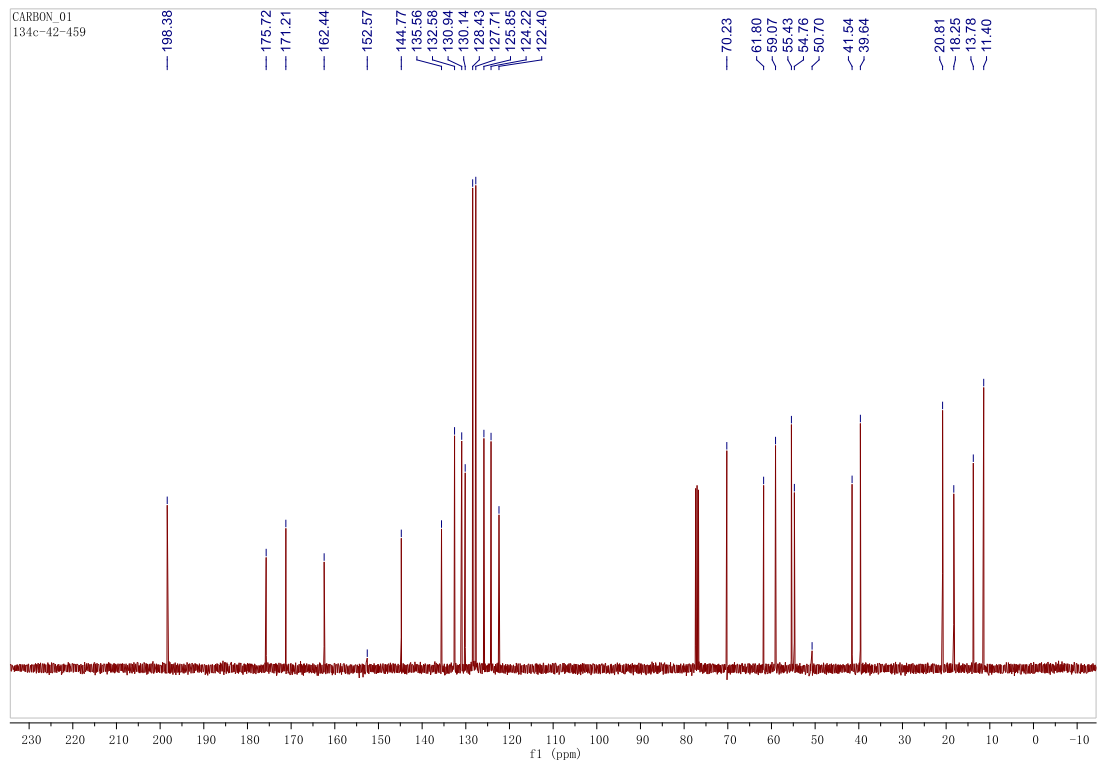

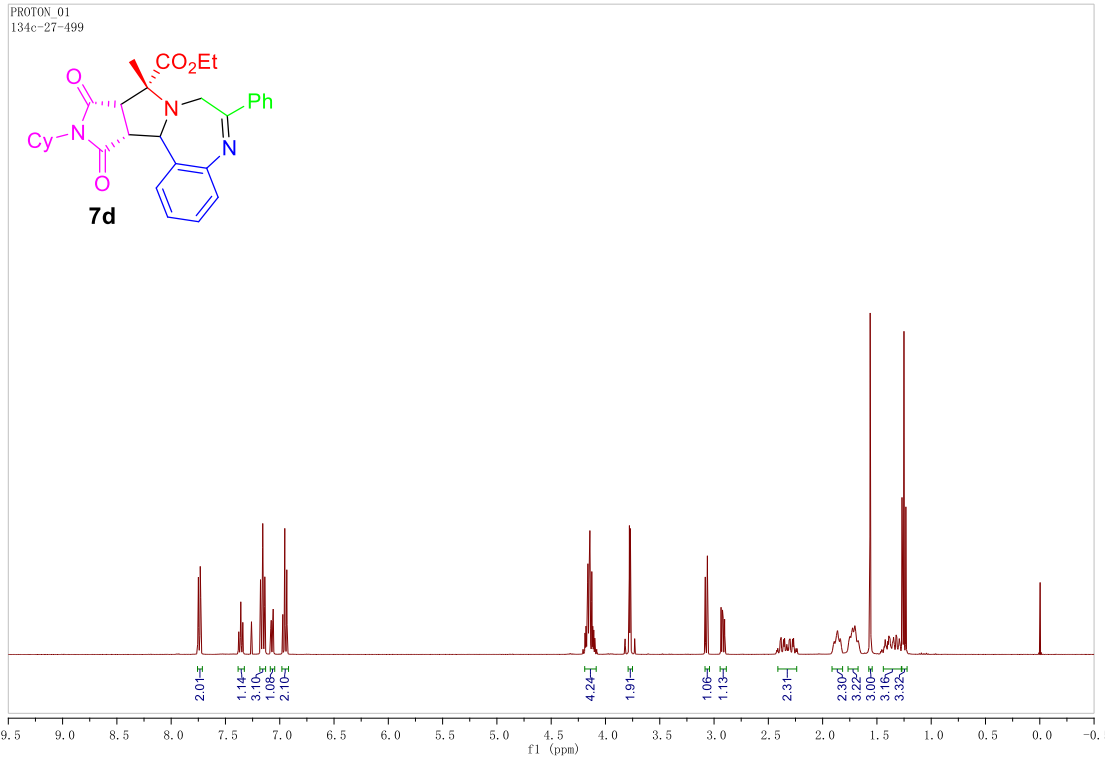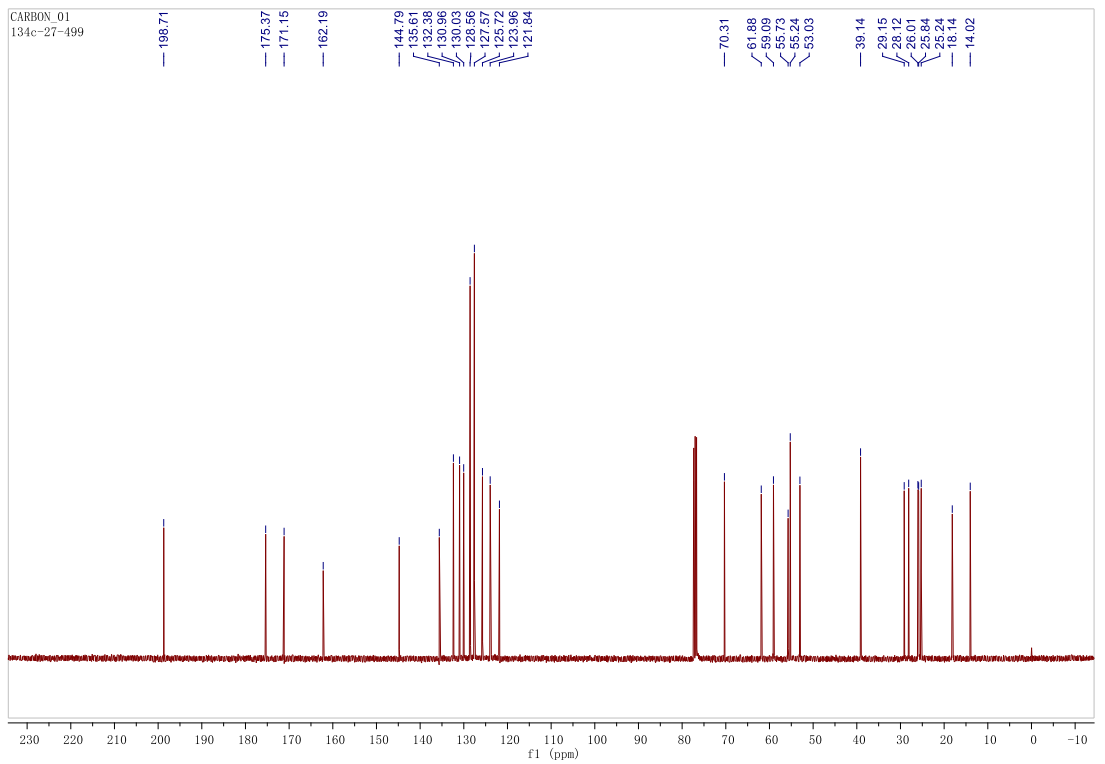

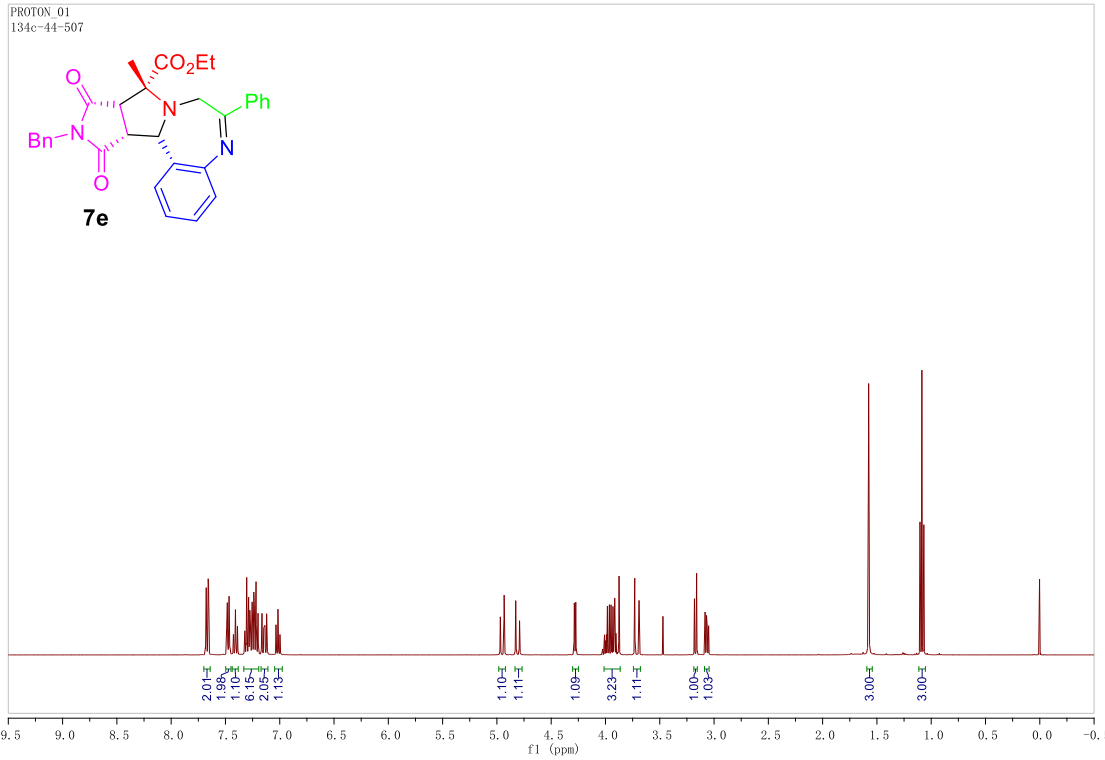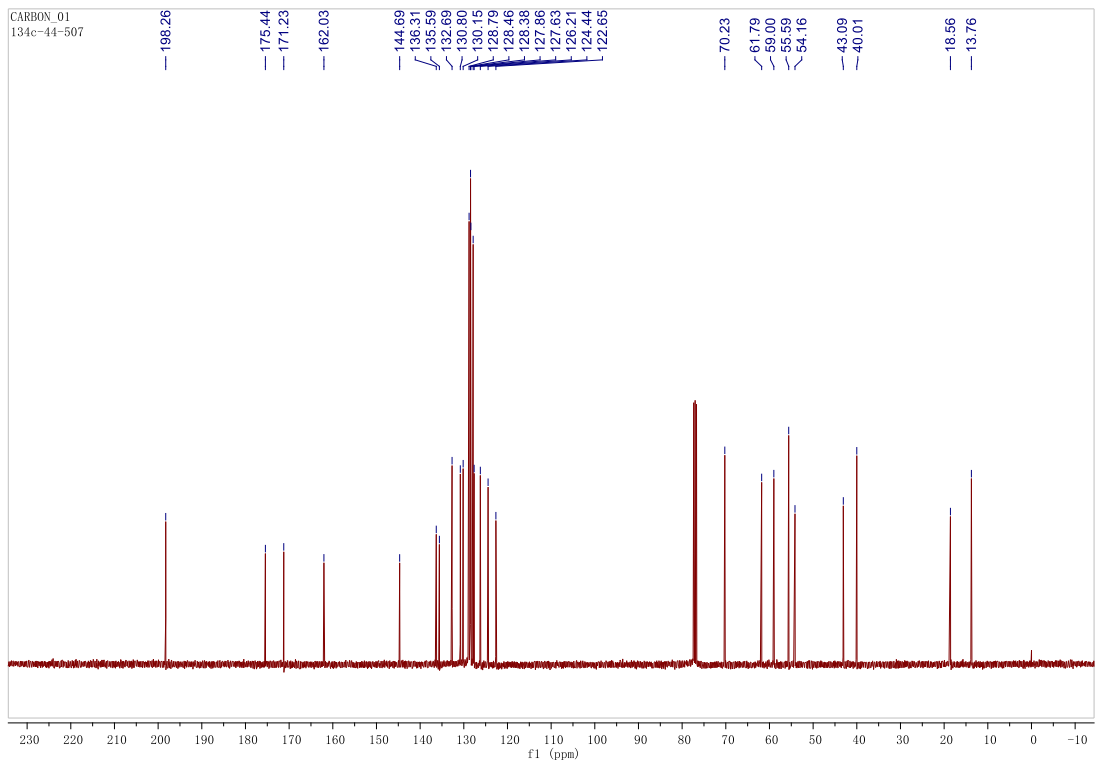

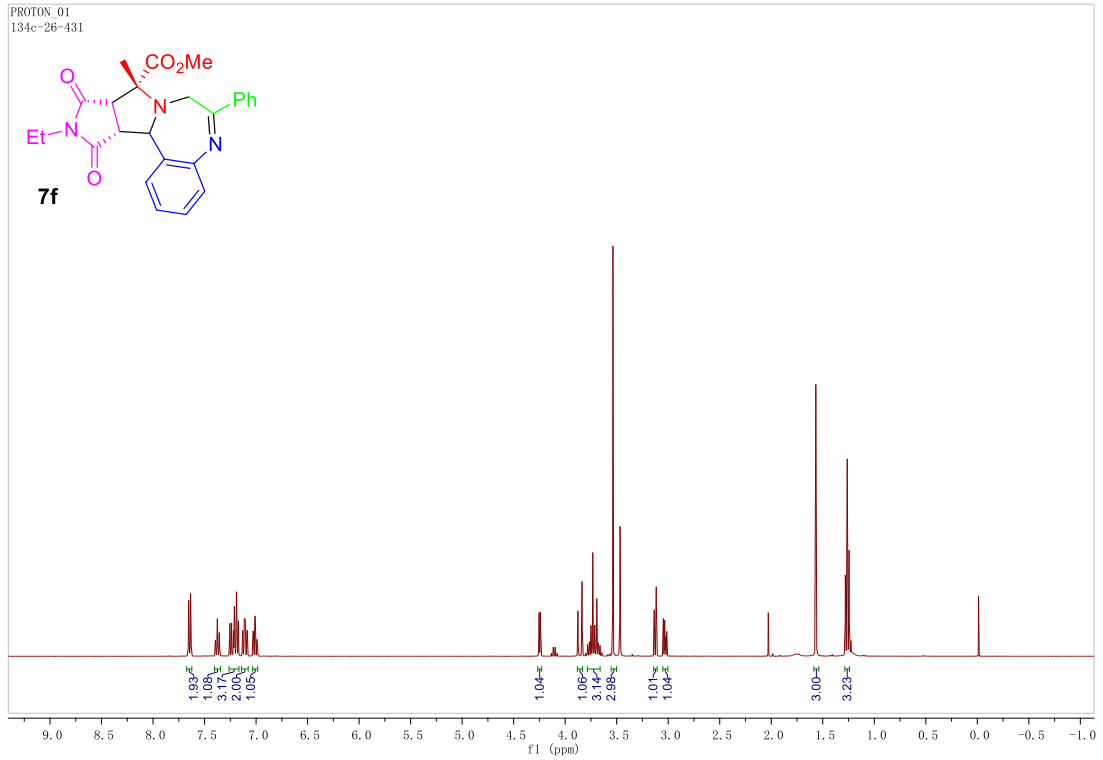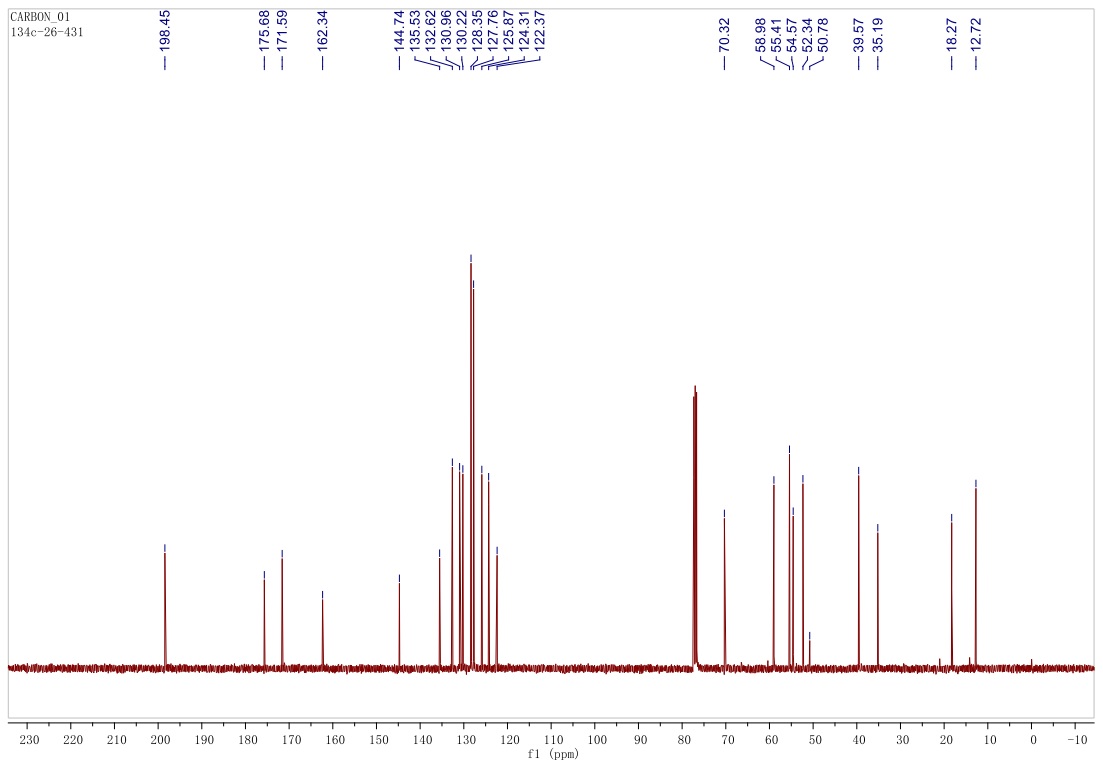

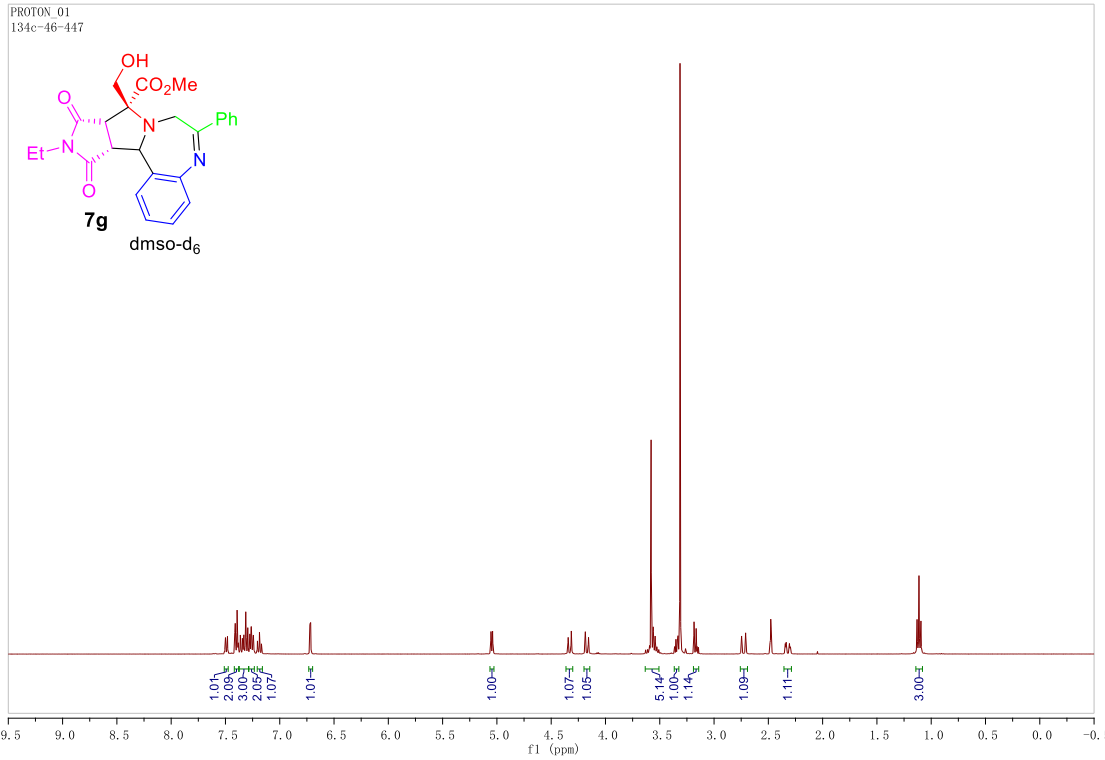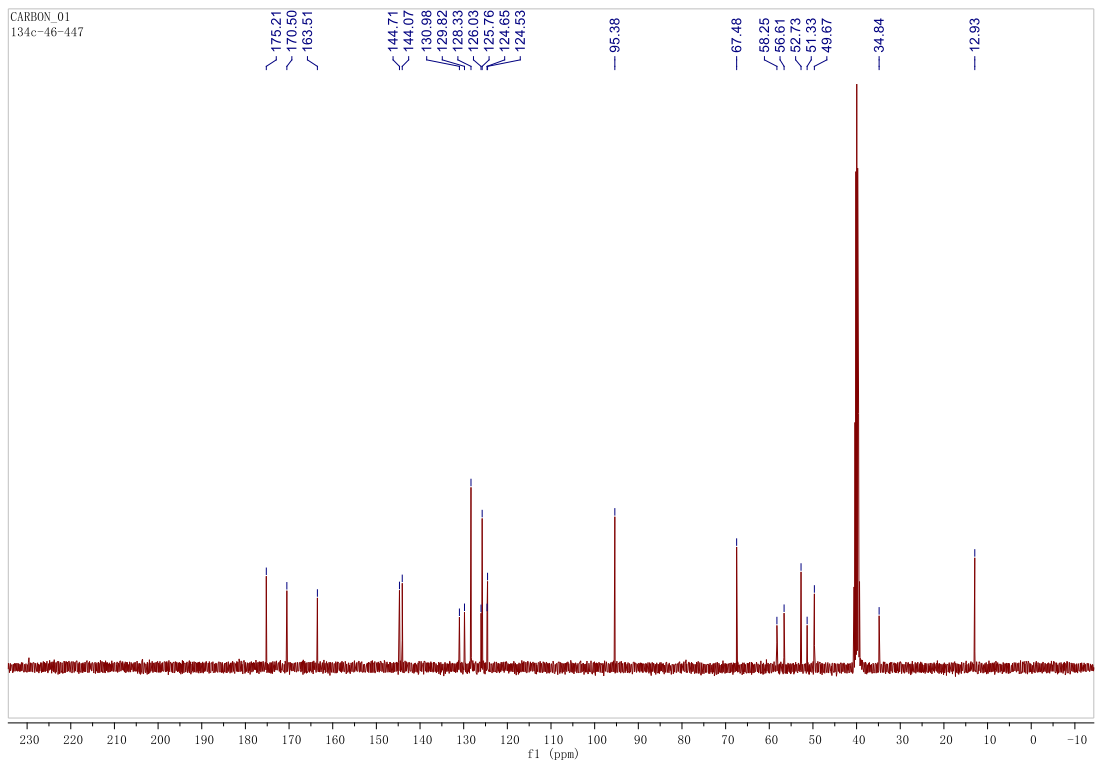

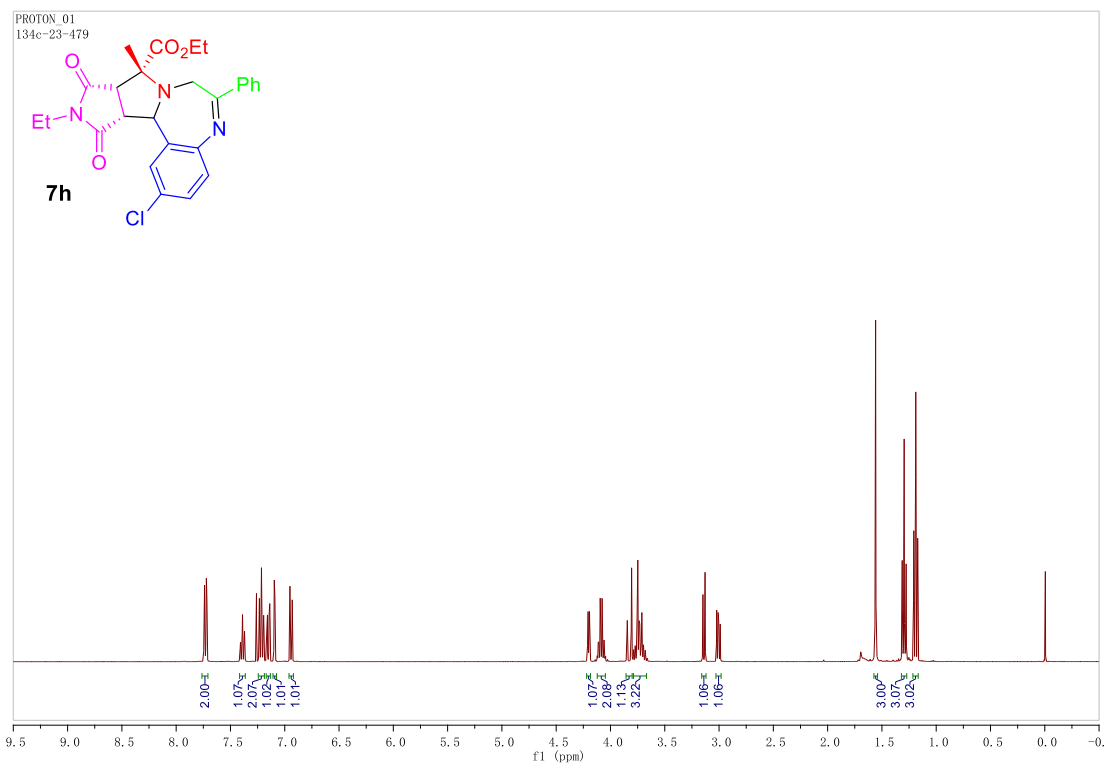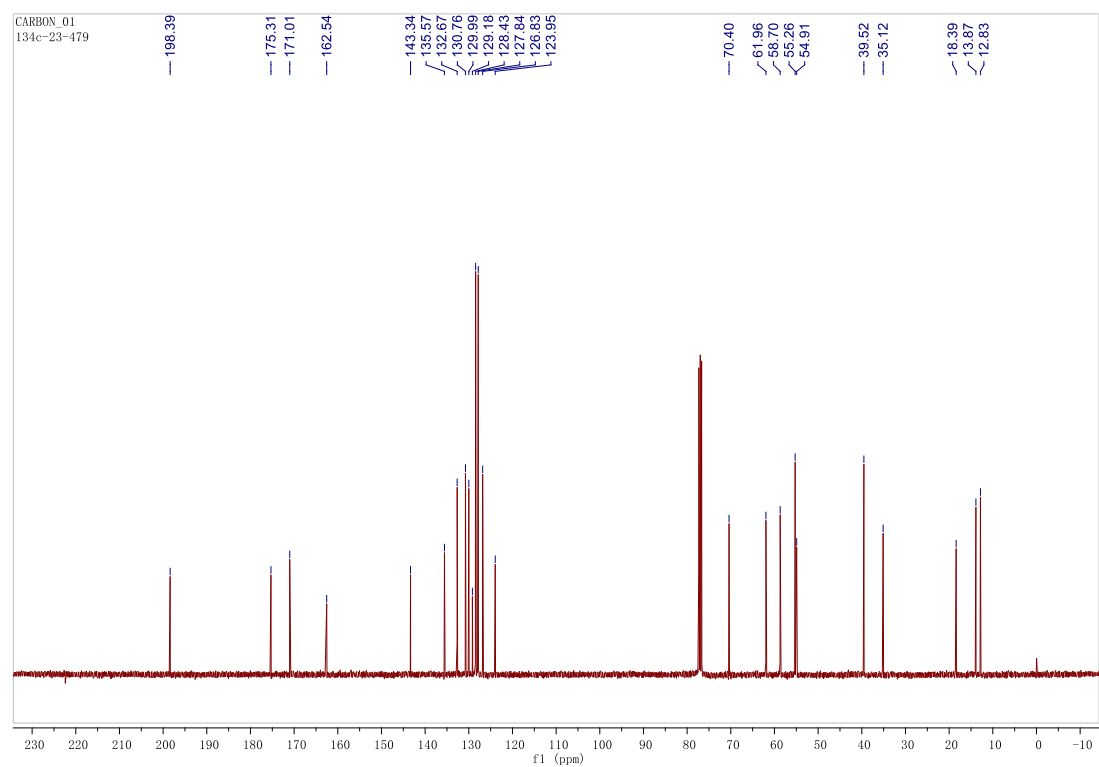

PROTON 01  
134c-24-524

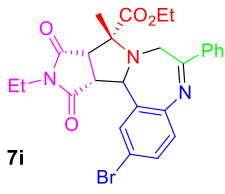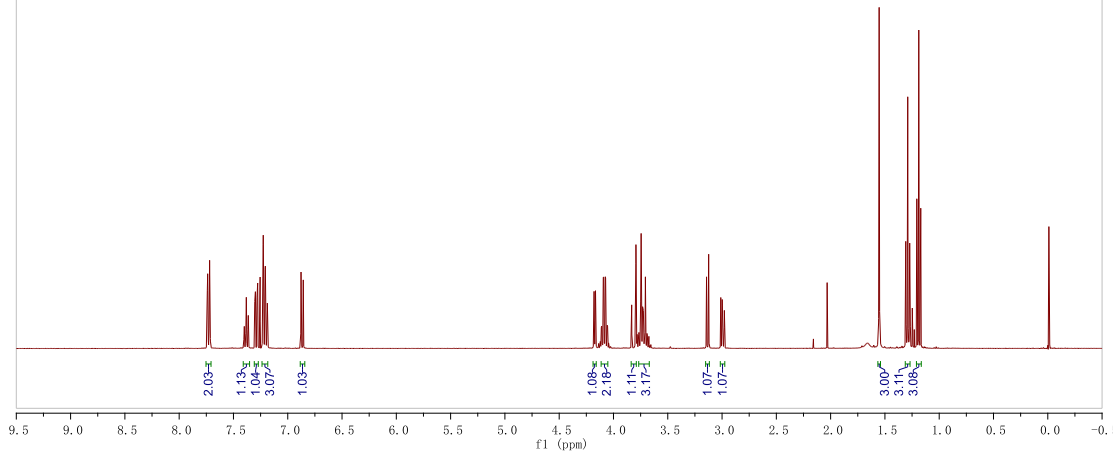

CARBON 01  
134c-24-524

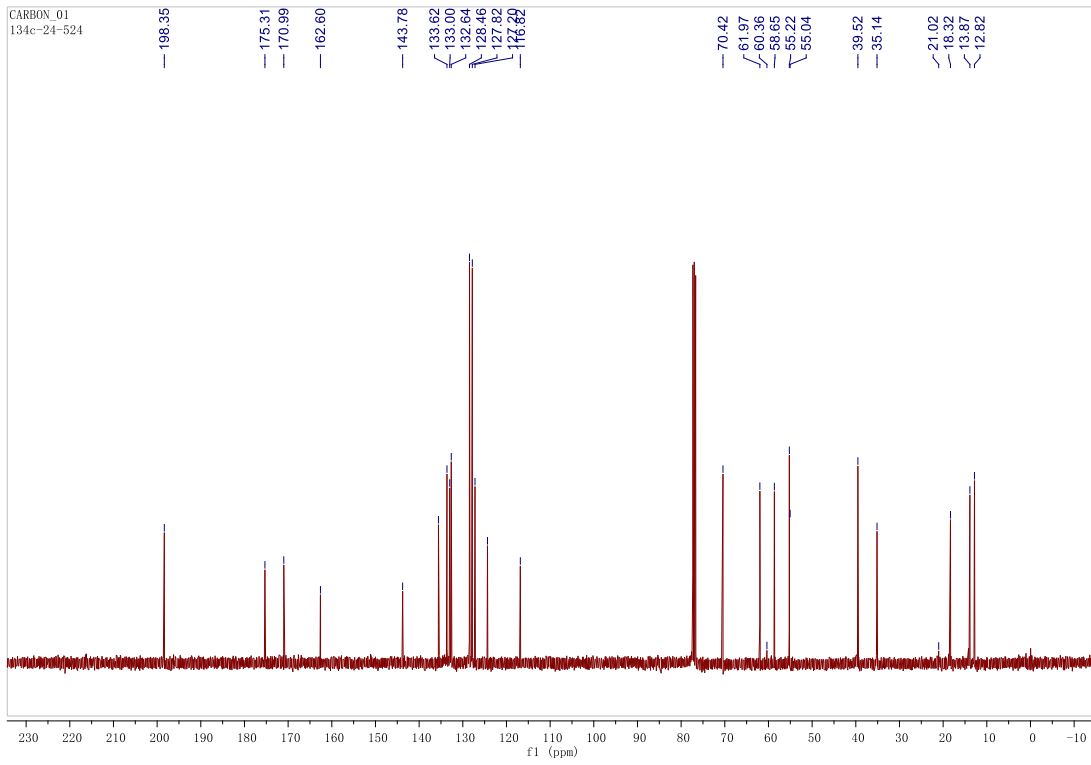

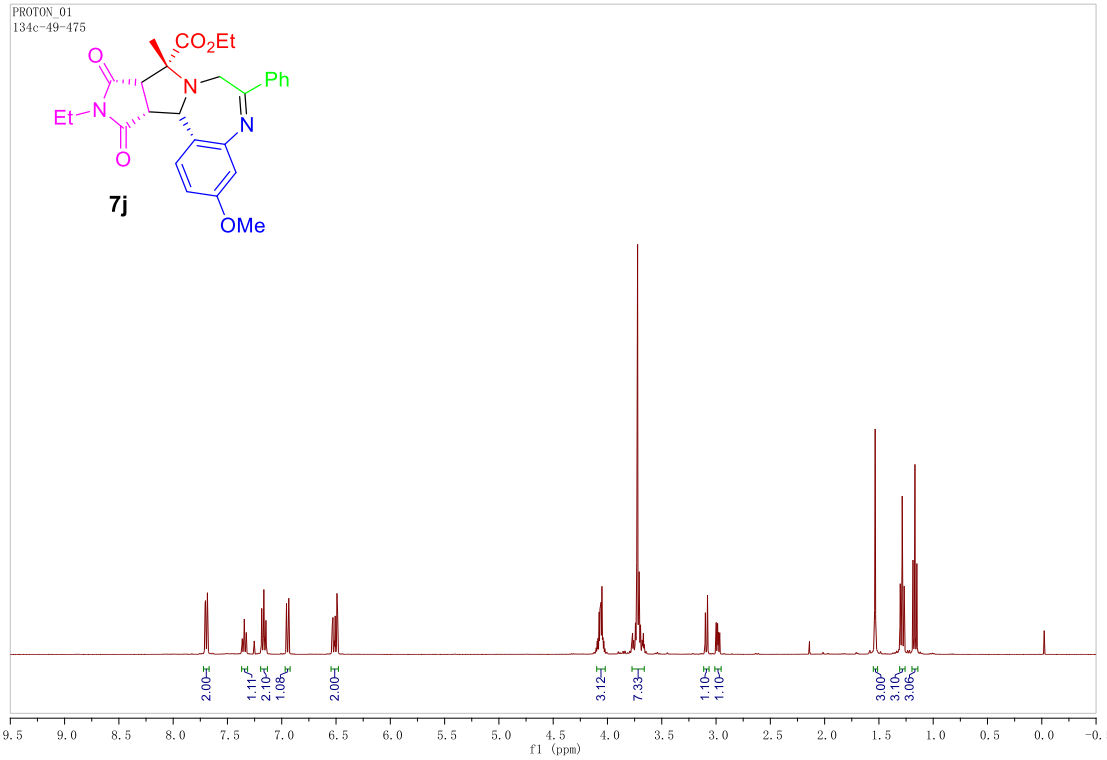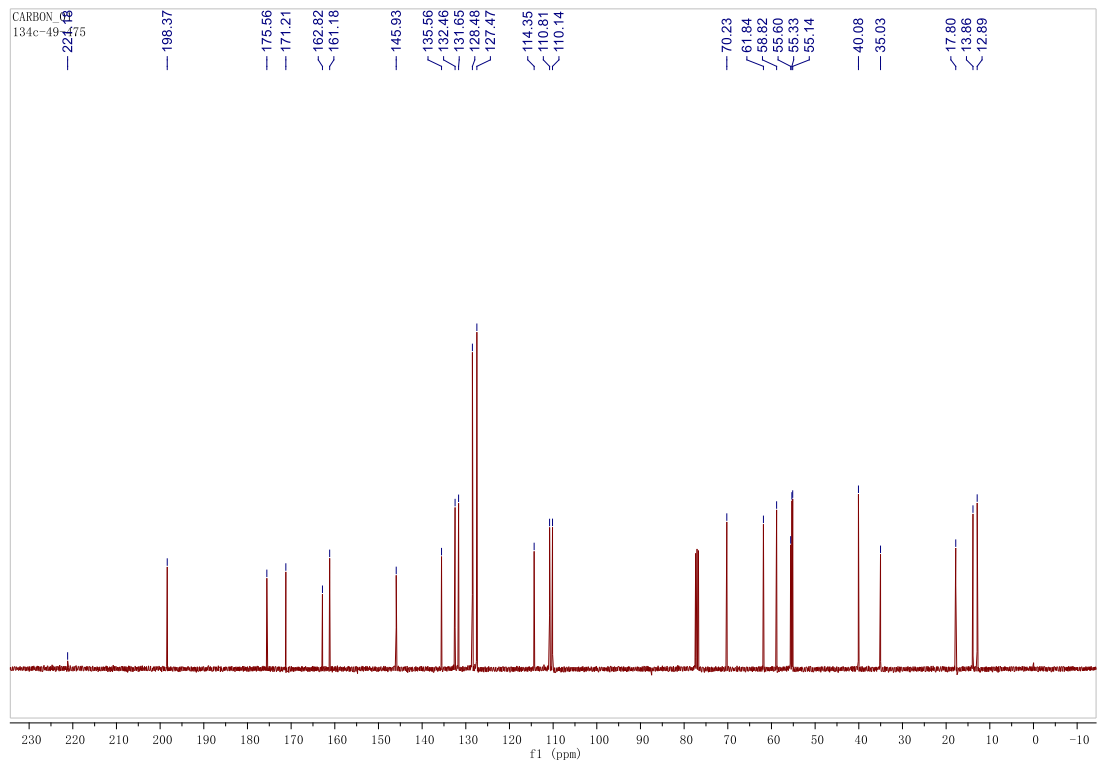



PROTON 01  
134c-56-463

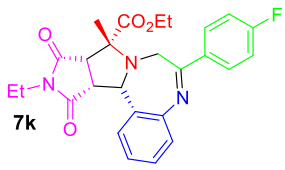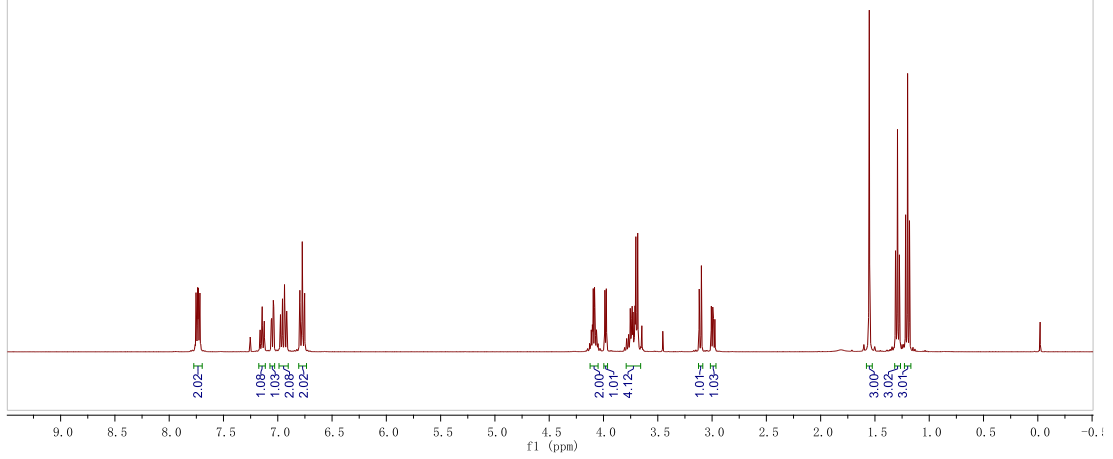

FLUORINE 01  
STANDARD FLUORINE PARAMETERS

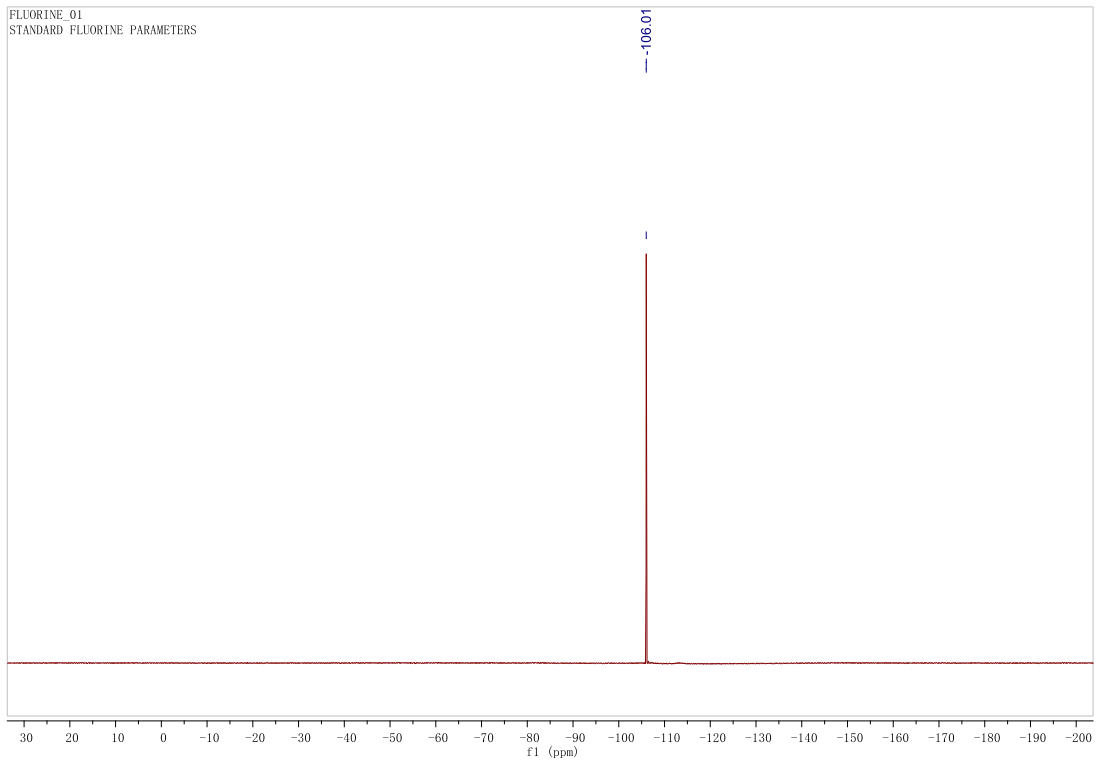

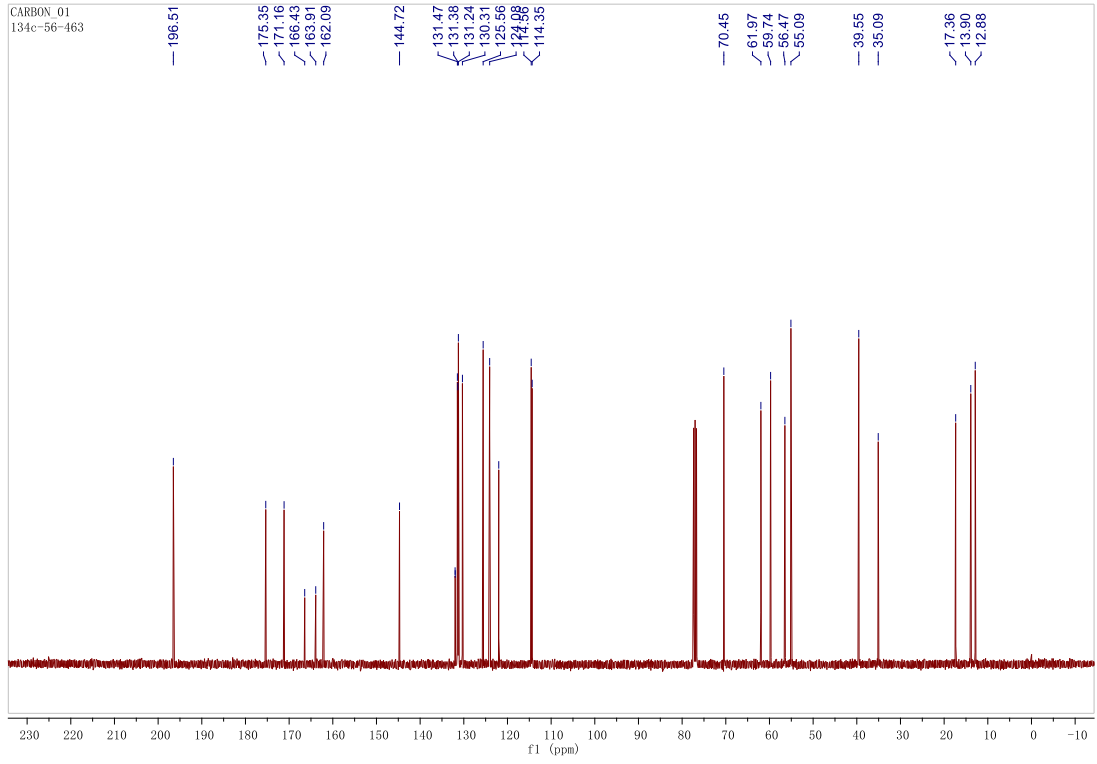

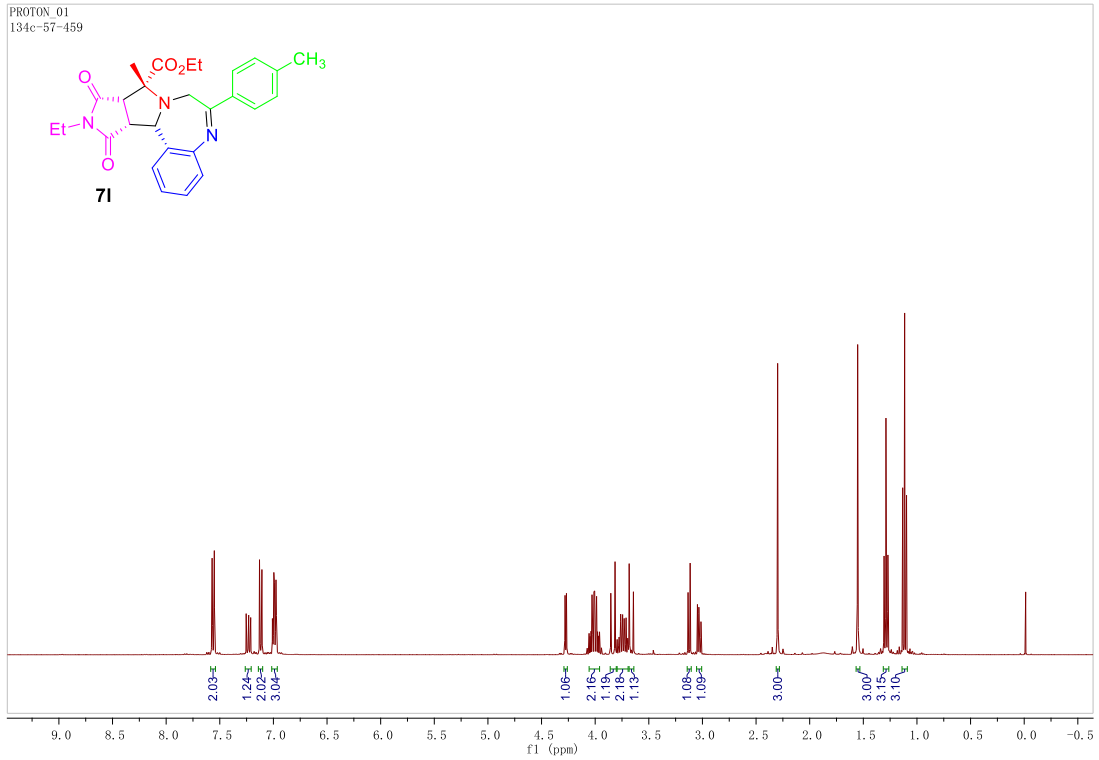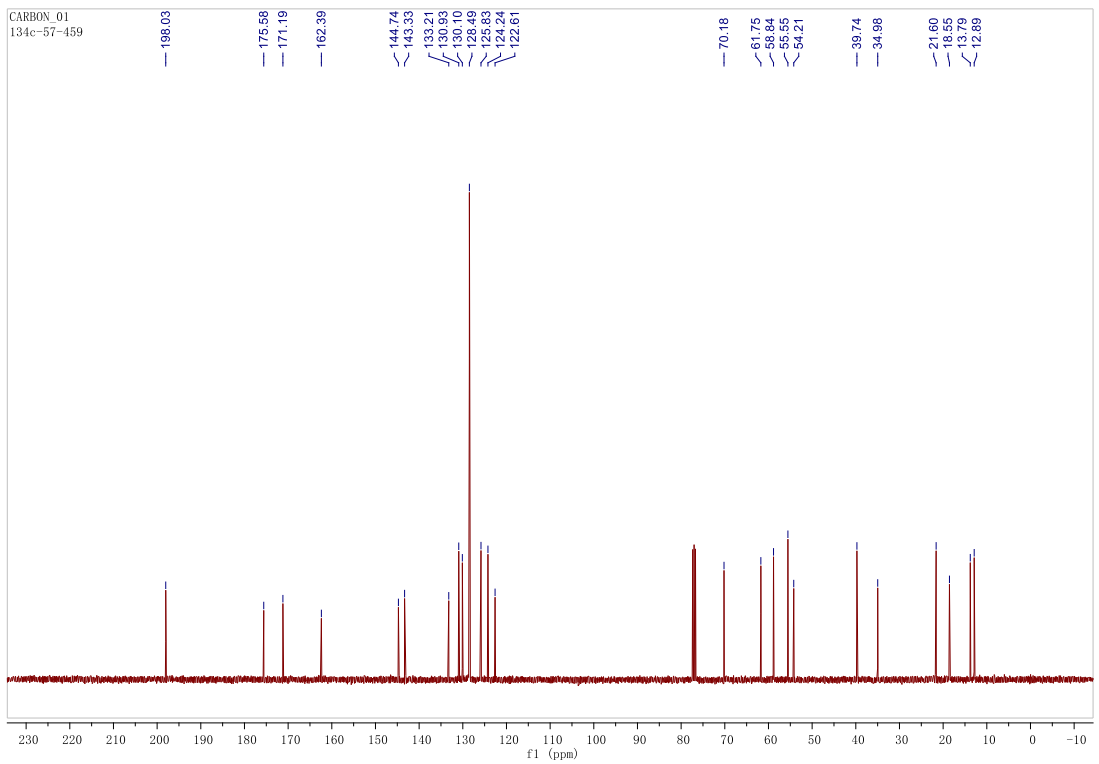

PROTON 01  
134c-55-513

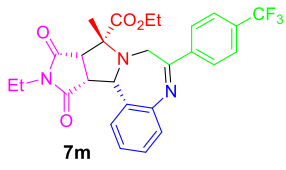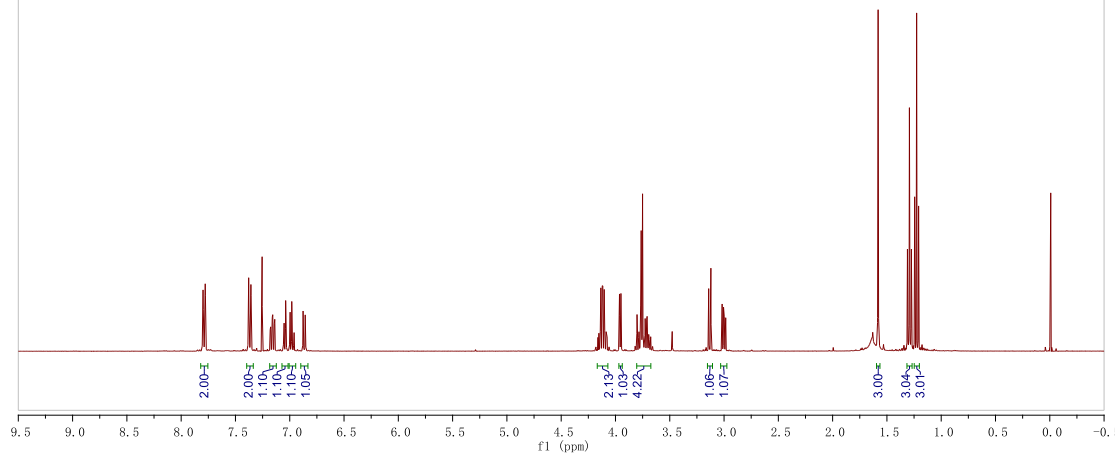

FLUORINE 01  
STANDARD FLUORINE PARAMETERS

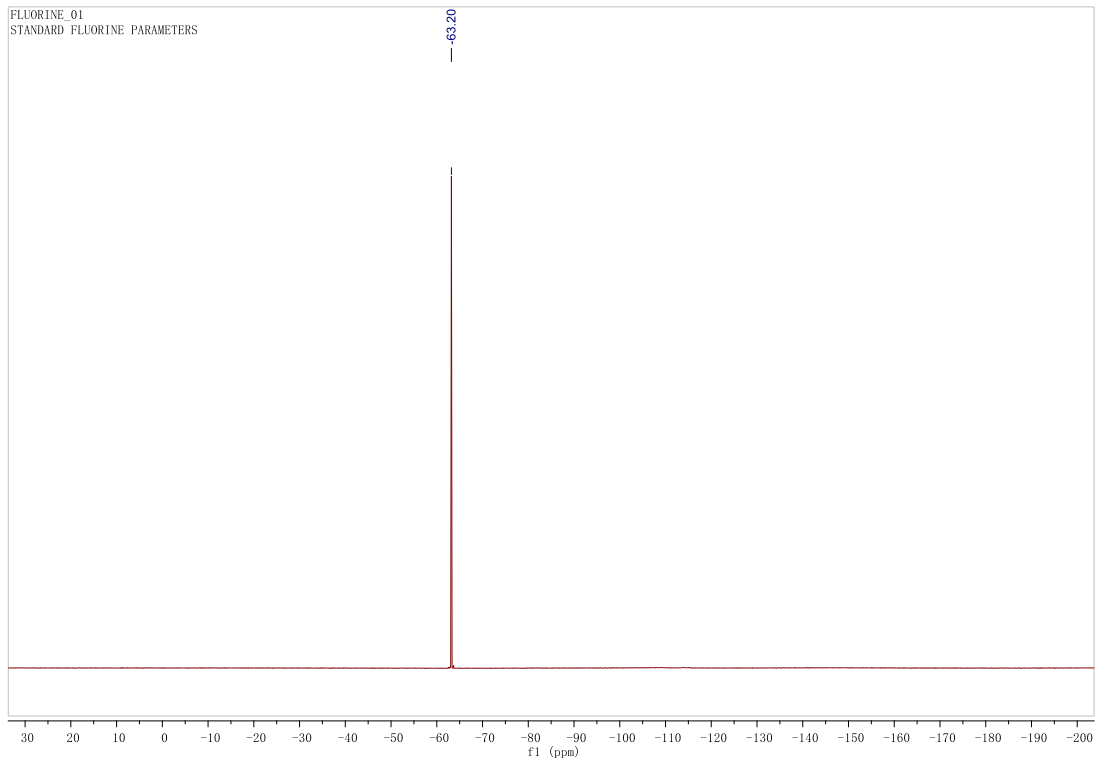

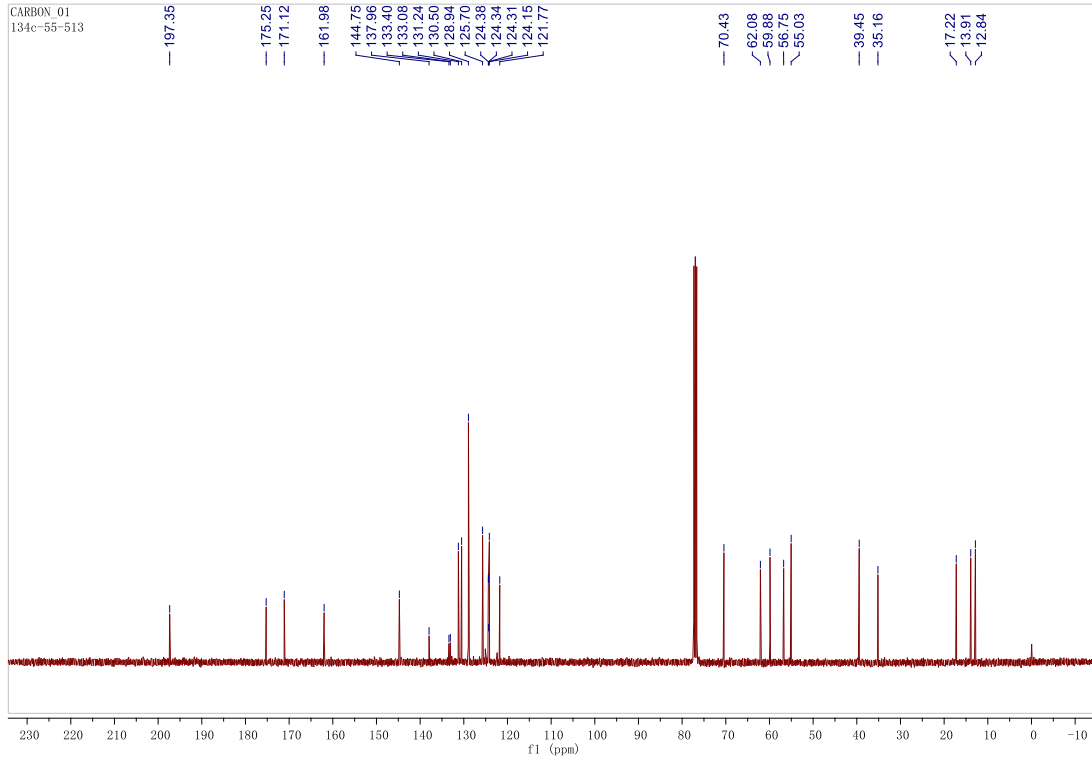

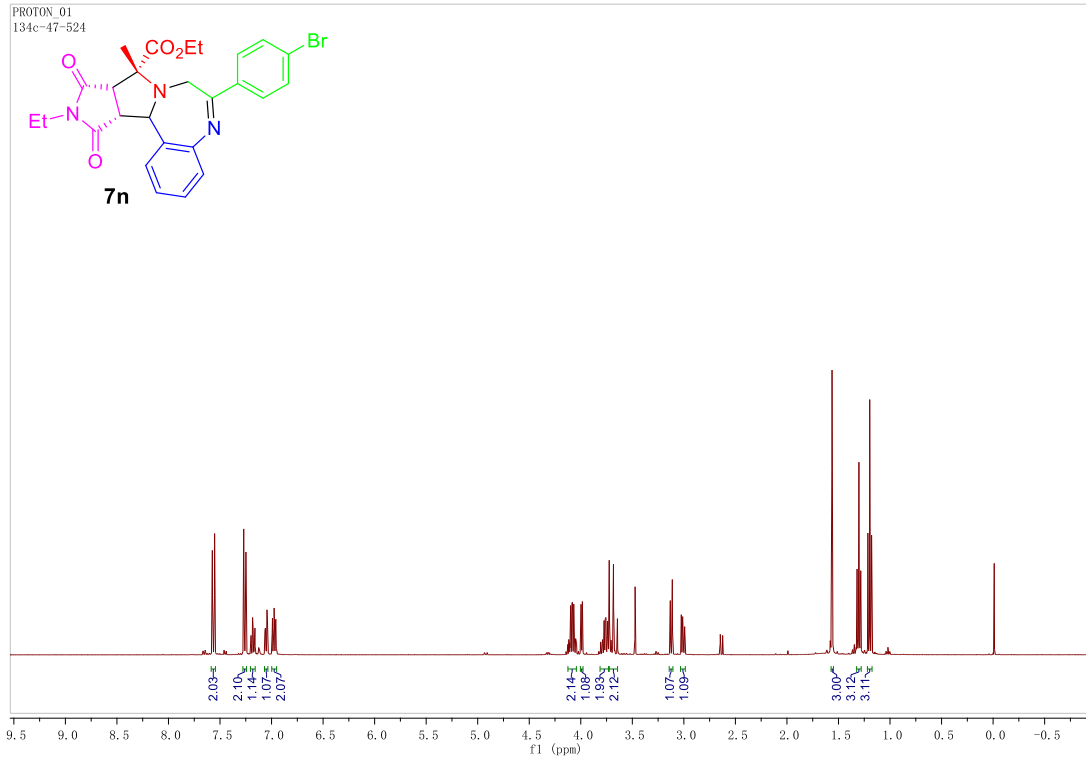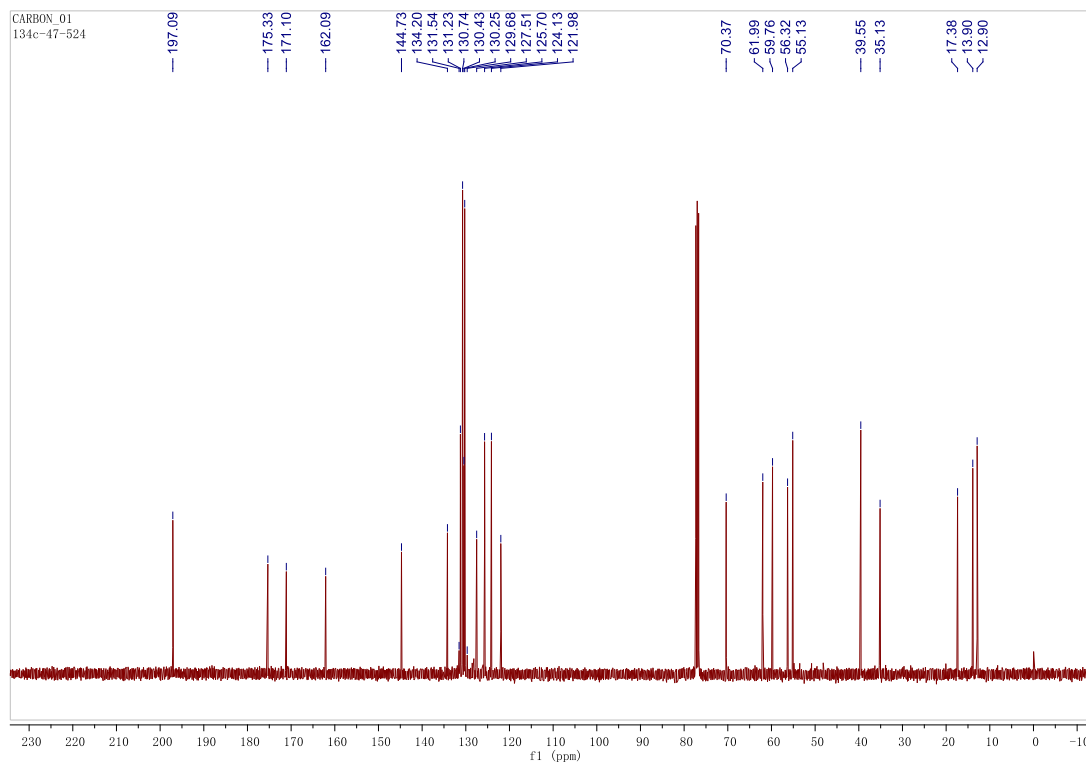

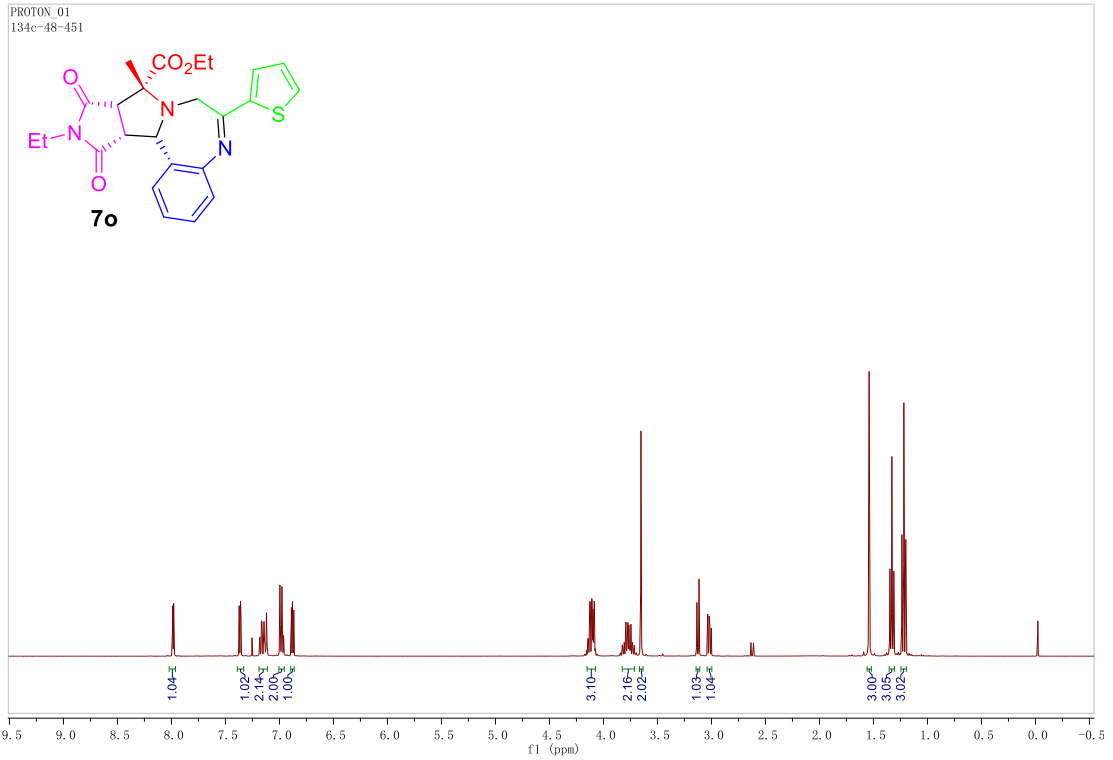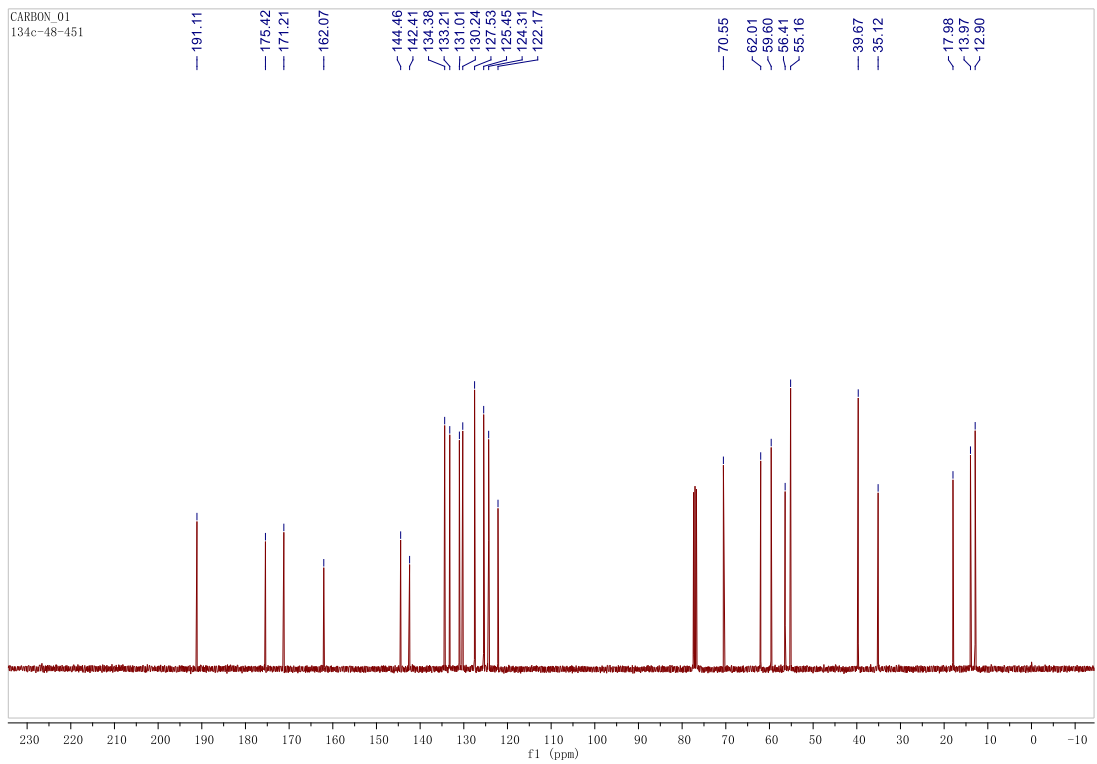

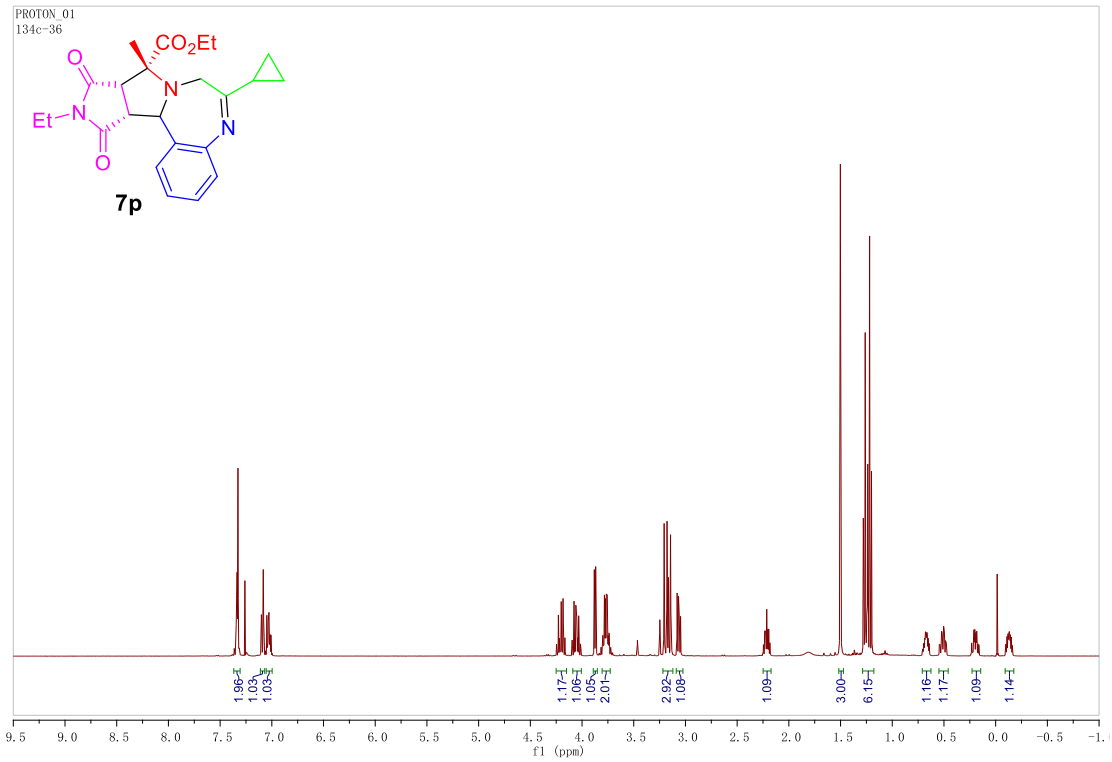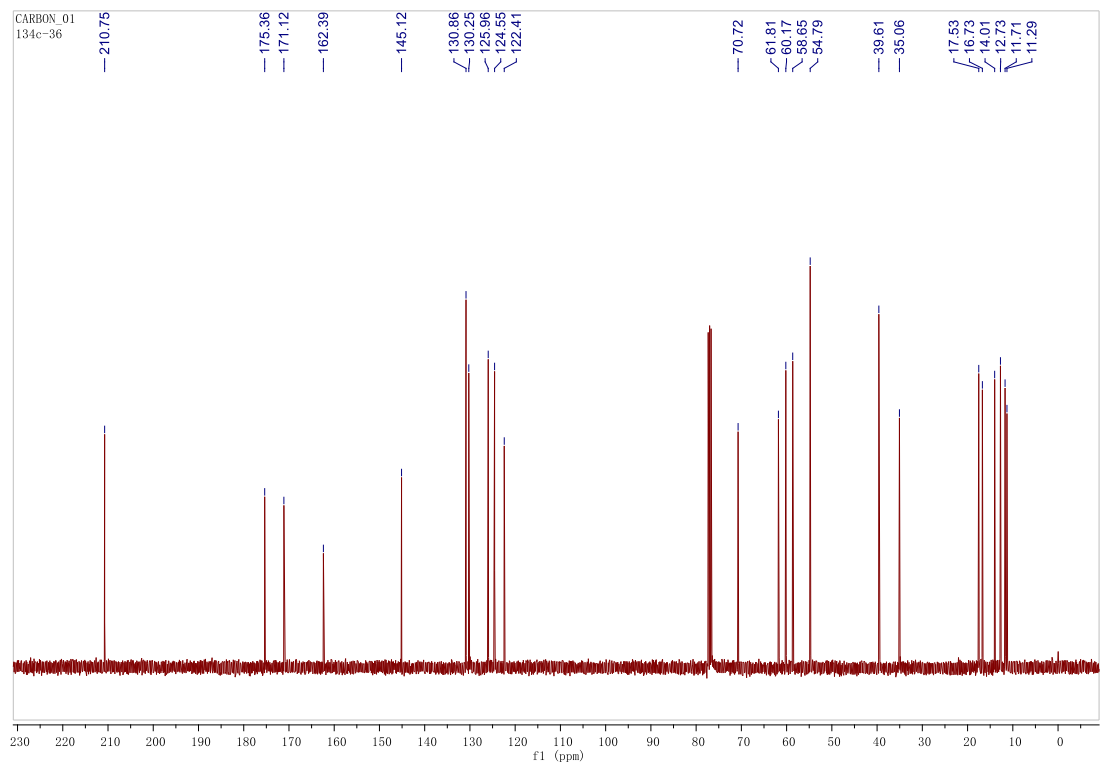



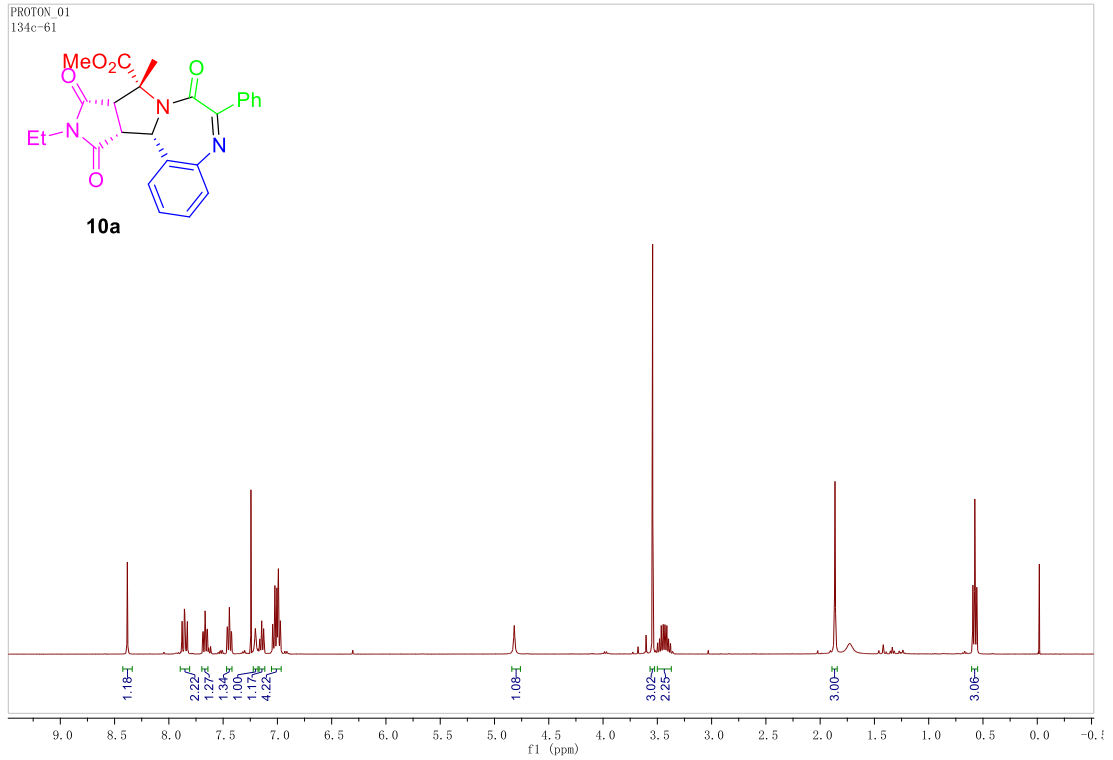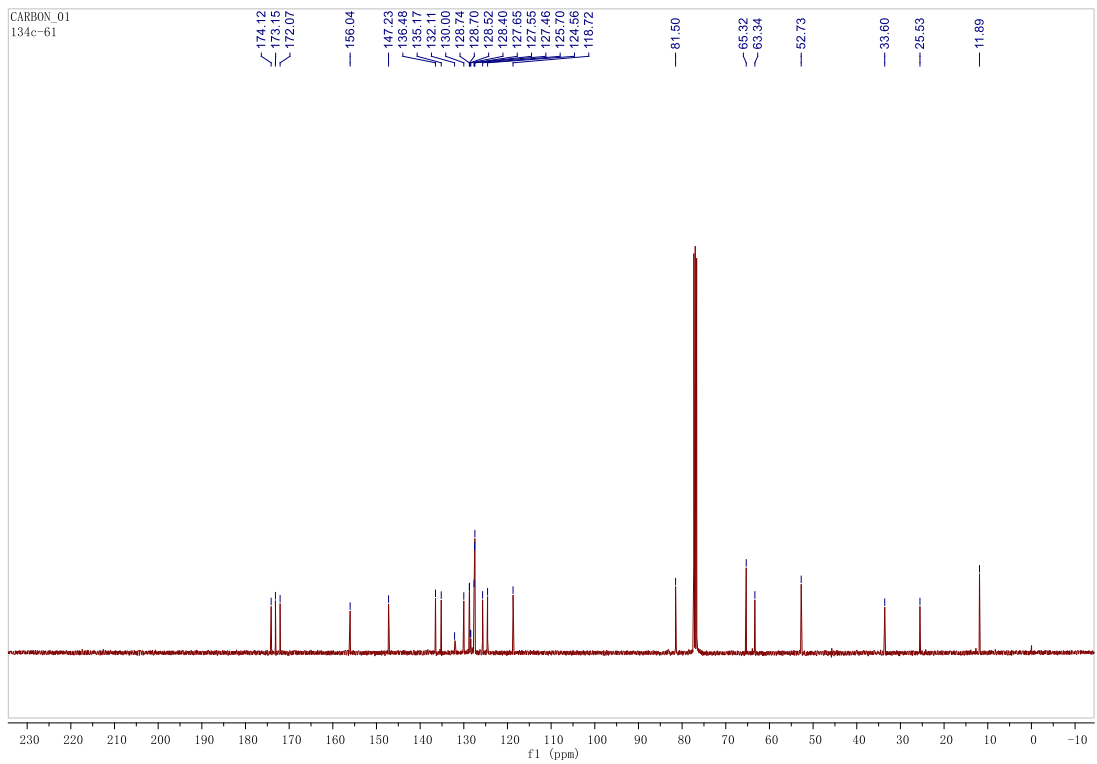

PROTON 01  
134c-62-513

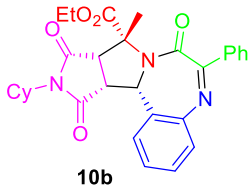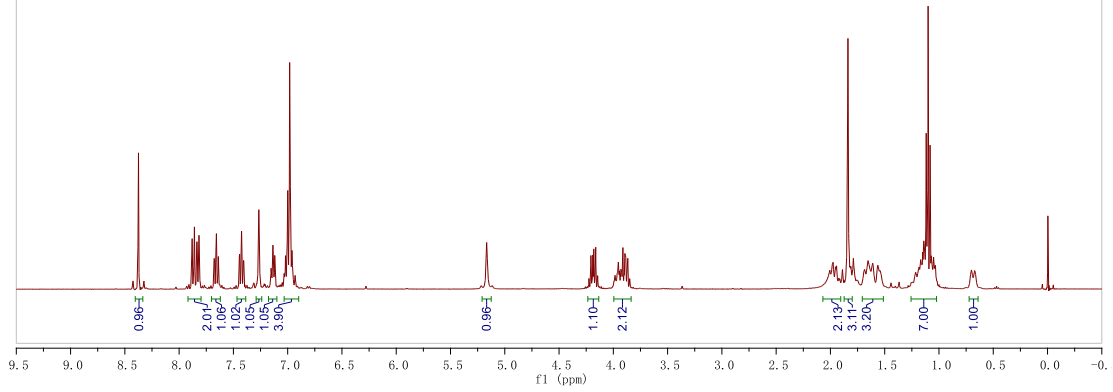

CARBON 01  
134c-62-513

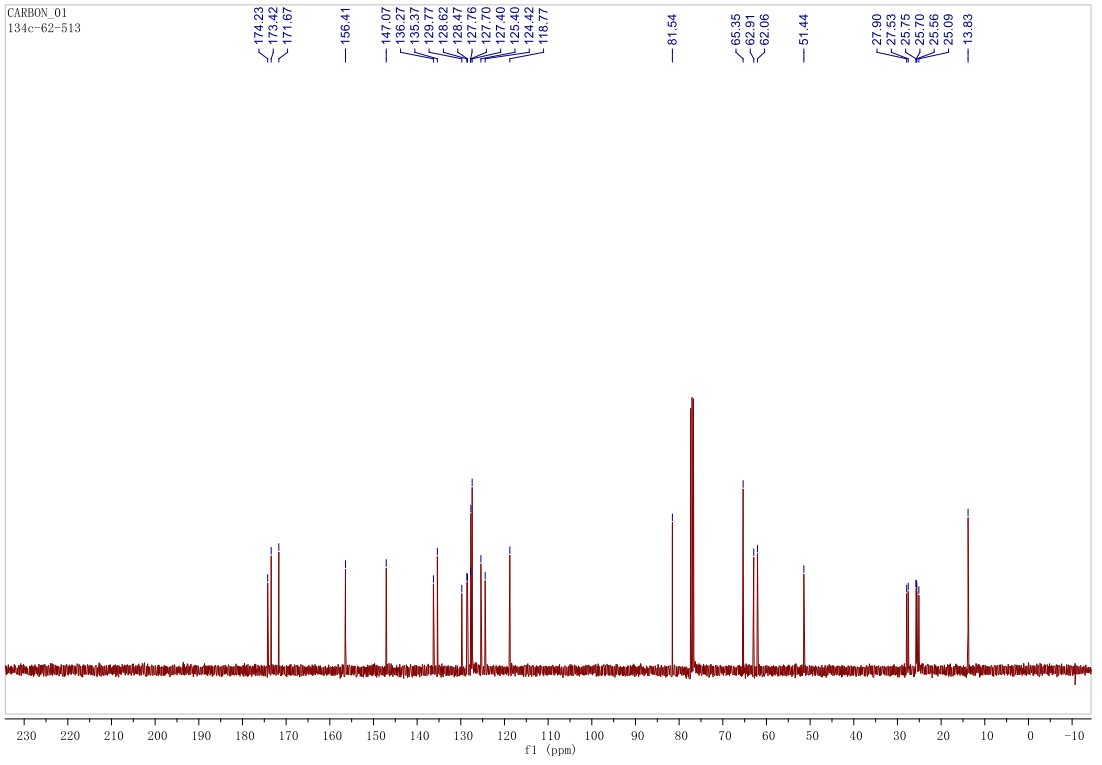

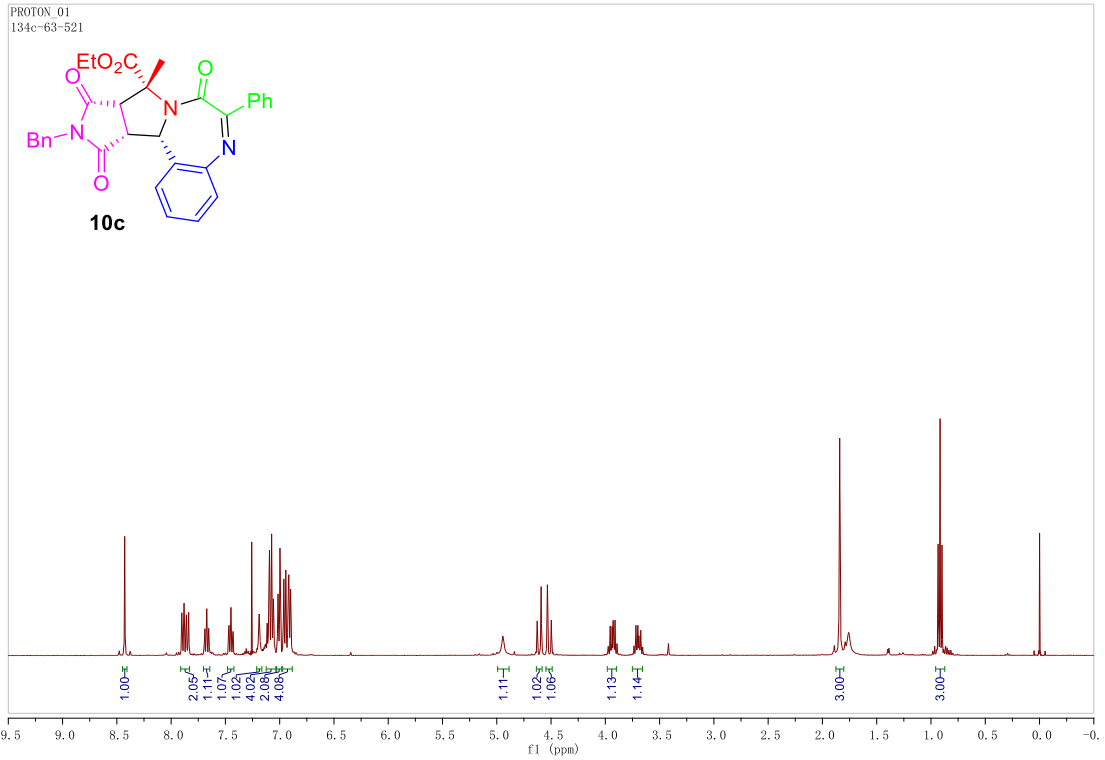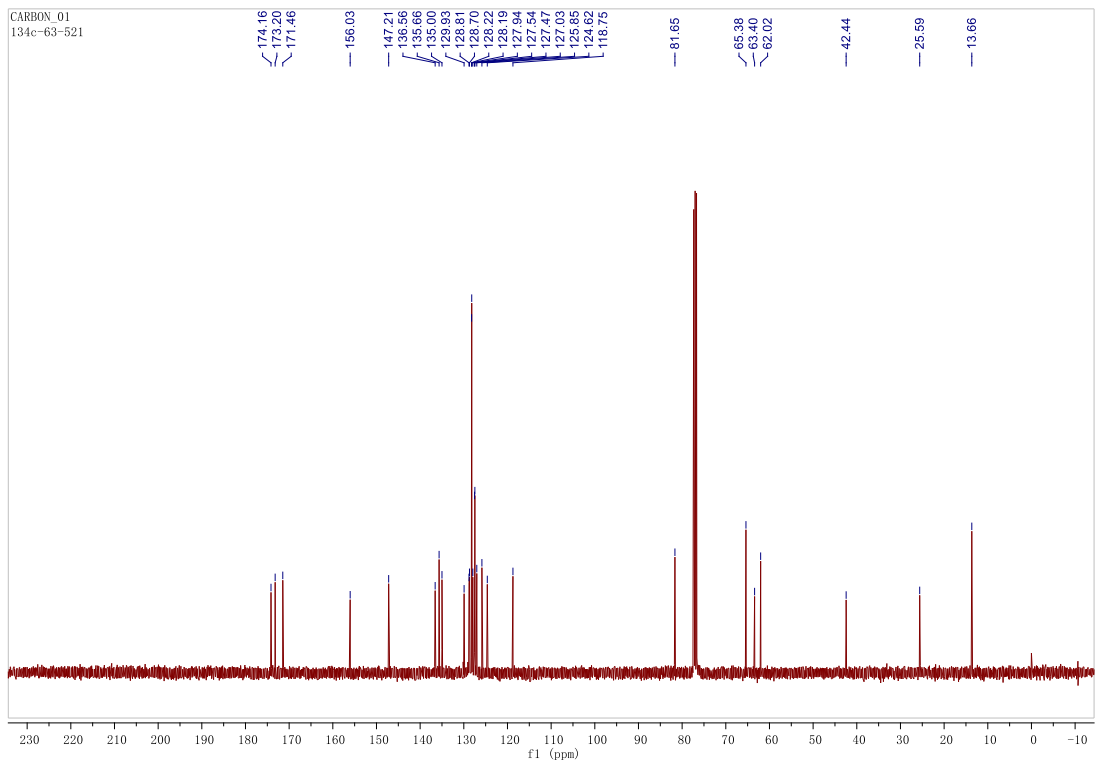

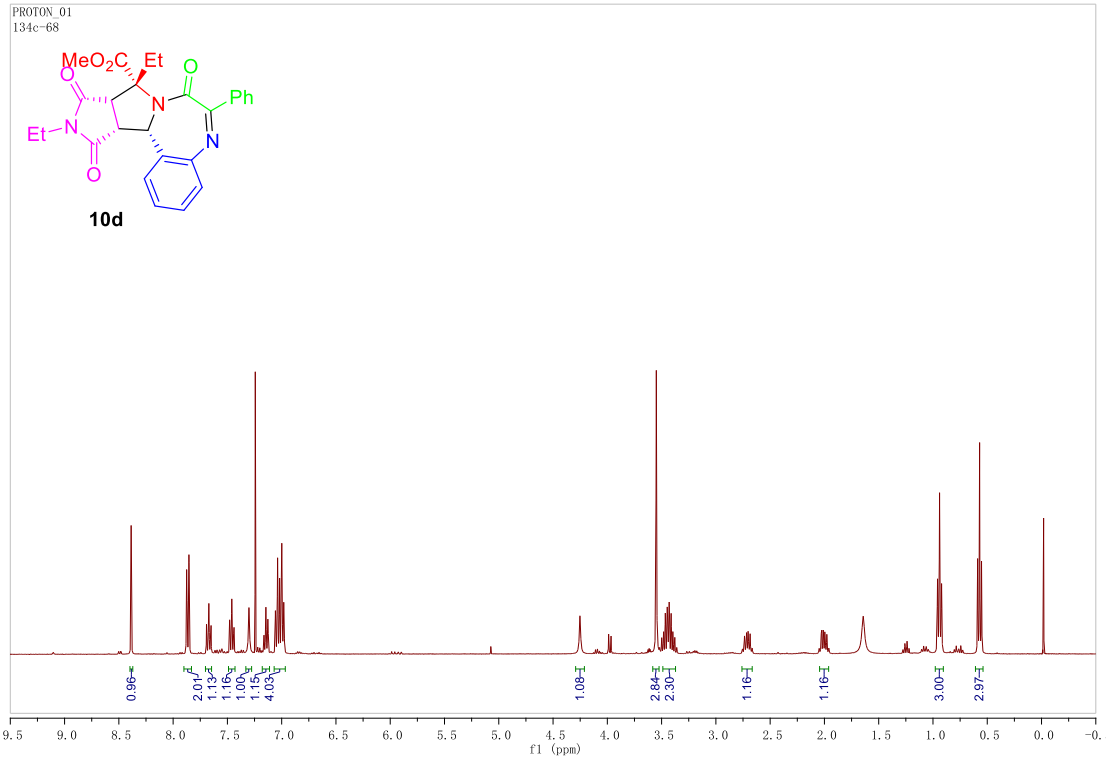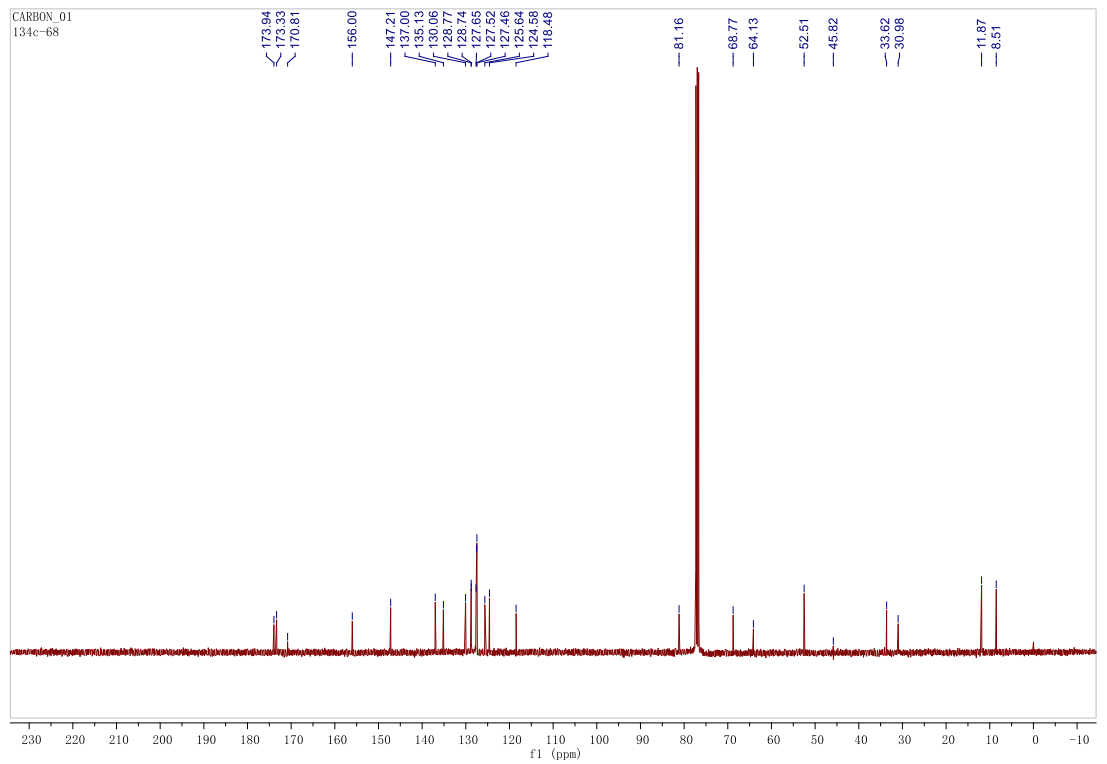

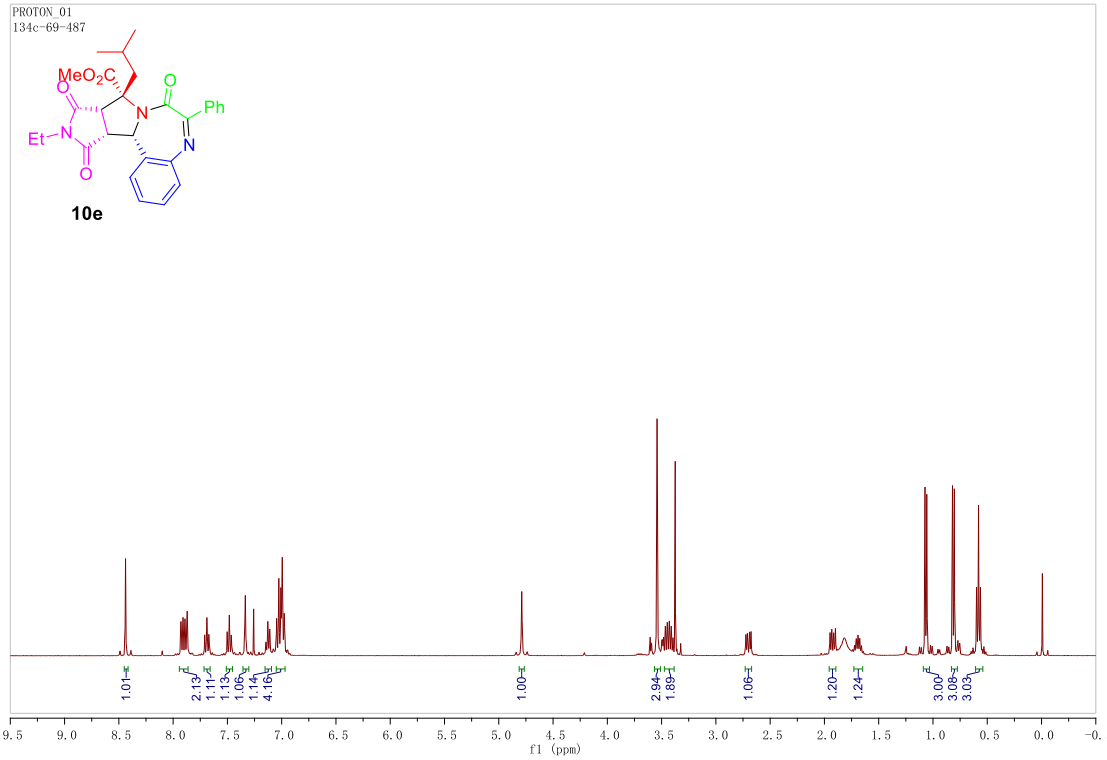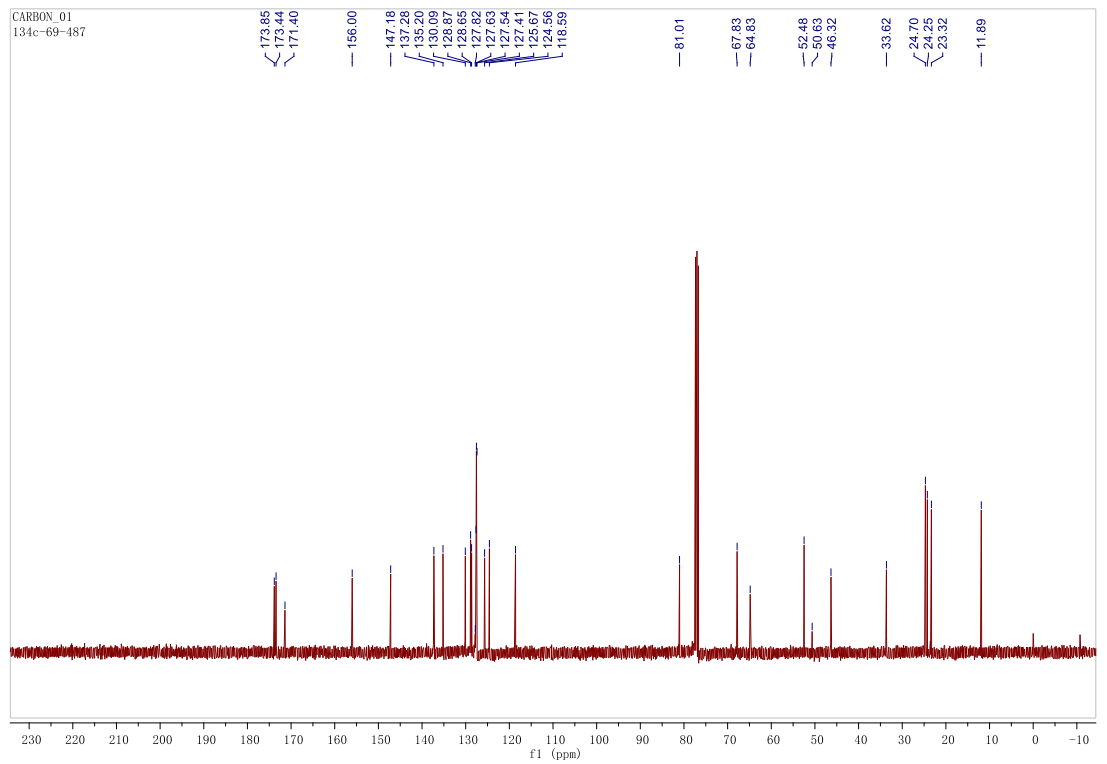

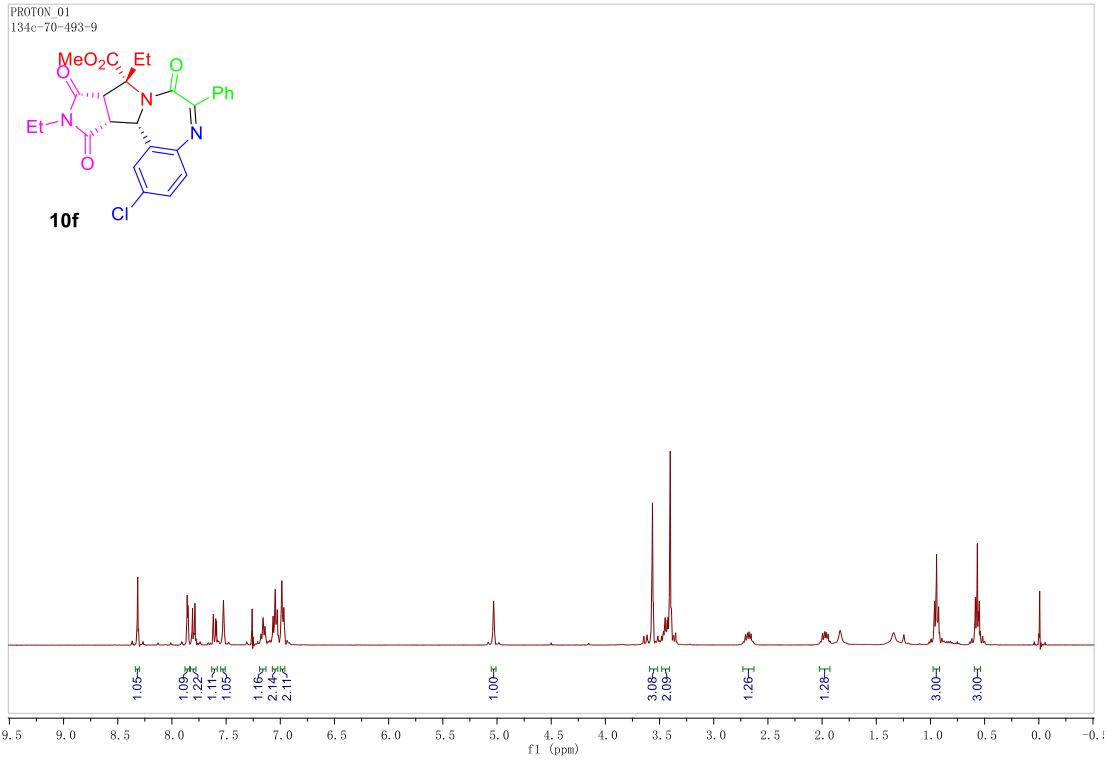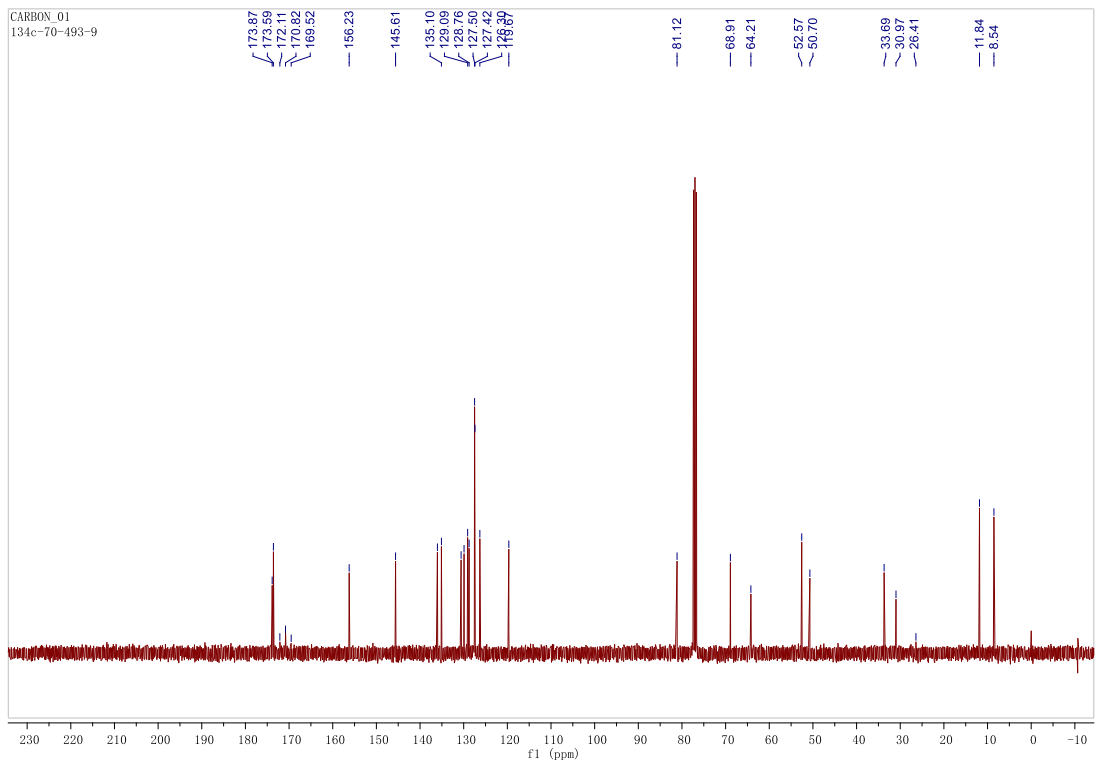



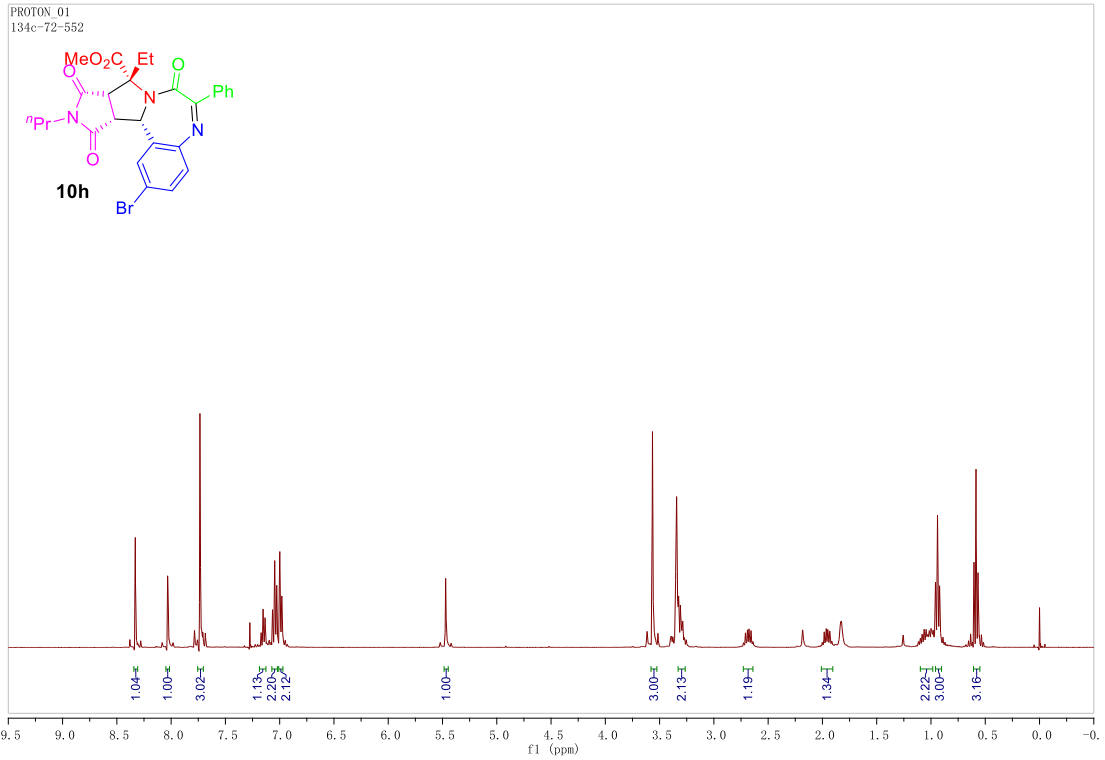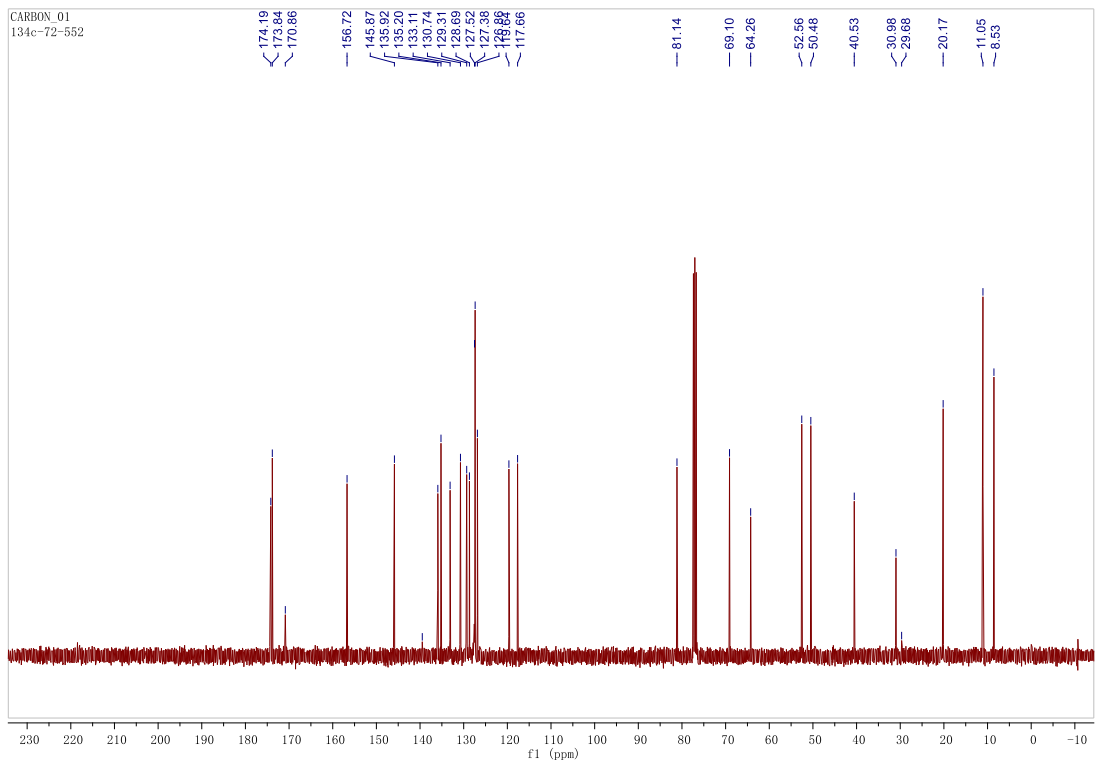



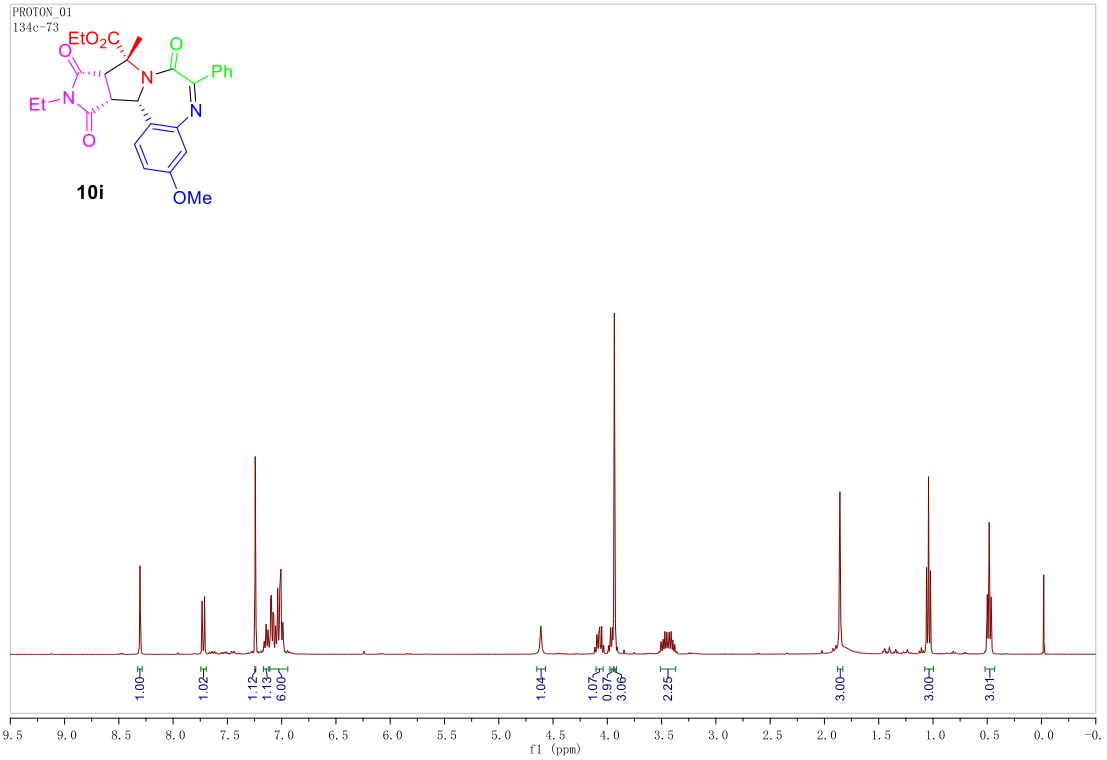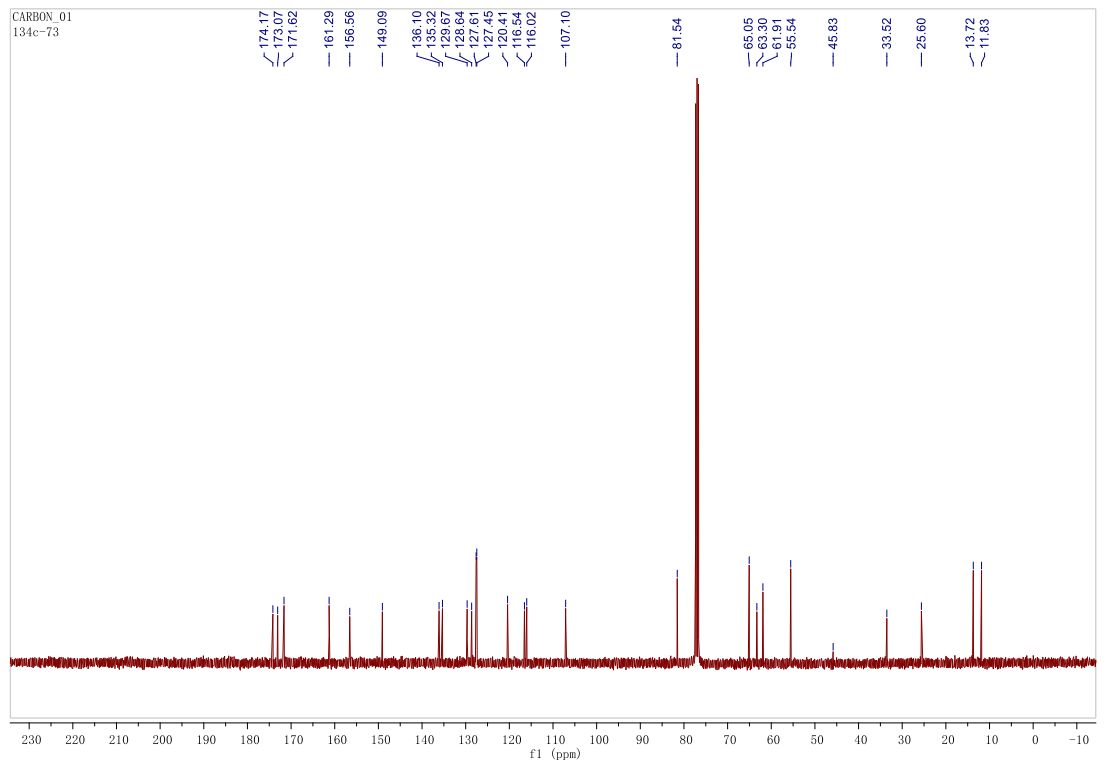

## 5. Green chemistry metrics analysis

The following formulae were used for calculating Atom Economy (AE), Atom Efficiency (AEf), Carbon Efficiency (CE), Reaction Mass Efficiency (RME), Optimum Efficiency (OE), Mass Productivity (MP), Mass Intensity (MI) and Process Mass Intensity (PMI), E factor, Solvent and Water Intensity (SI and WI).<sup>1-14</sup>

$$AE = \frac{\text{Molecular weight of product}}{\text{Total molecular weight of reactants}} \times 100$$

$$AEf = AE \times \text{yield}\%$$

$$CE = \frac{\text{Amount of carbon in the product}}{\text{Total carbon present in reactants}} \times 100$$

$$RME = \frac{\text{Mass of isolated product}}{\text{Total mass of reactants}} \times 100$$

$$OE = \frac{RME}{AE} \times 100$$

$$MI = \frac{\text{Total mass of input material in a process or process step}}{\text{Mass of product}}$$

$$PMI = \frac{\text{Total mass of input material in the whole process}}{\text{Mass of product}}$$

$$MP = \frac{1}{PMI} \times 100$$

$$E \text{ Factor} = PMI - 1$$

$$SI = \frac{\text{Total mass of solvents excl. water in the whole process}}{\text{Mass of product}}$$

$$WI = \frac{\text{Total mass of water used in the whole process}}{\text{Mass of product}}$$

### 5.1 One-pot process

One-pot synthesis of pyrrolo[1,2-d][1,4]benzodiazepine **7a**:

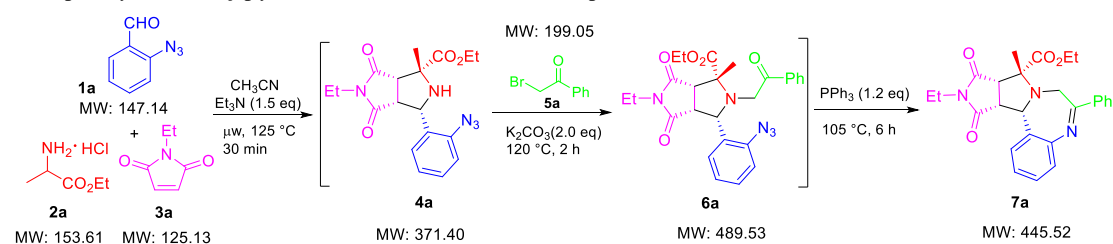

This is a one-pot synthesis with only one step of separation for the final product.

#### Experimental procedures:

A solution of 2-azidobenzaldehyde **1a** (73.6 mg, 0.5 mmol), L-alanine ethyl ester **2a** (92.2 mg, 0.6

mmol) and N-ethylmaleimide **3a** (68.8 mg, 0.55 mmol) in CH<sub>3</sub>CN (2 mL) with Et<sub>3</sub>N (76.0mg, 0.75 mmol) were heated at 125 °C for 30 min under microwave in a sealed vial. Then phenacyl bromide **5a** (298.5 mg, 1.5 mmol) and K<sub>2</sub>CO<sub>3</sub> (138.2 mg, 1 mmol) was added into the pyrrolidine **4a** containing mixture followed by heating at 120 °C for 2 h. Upon the completion of the reaction as monitored by LC-MS, PPh<sub>3</sub> (157.2 mg, 0.6 mmol) was added to the mixture and then heated at 105 °C for 6 h. The concentrated reaction mixture was separated on YAMAZEN AI-580 flash column system to afford product **7a** 189.3 mg (85% yield).

Materials used for metrics calculations: 2-azidobenzaldehyde **1a** (73.6 mg, 0.5 mmol), L-alanine ethyl ester **2a** (92.2 mg, 0.6 mmol) and N-ethylmaleimide **3a** (68.8 mg, 0.55 mmol), CH<sub>3</sub>CN (1580 mg, 2 mL), Et<sub>3</sub>N (76.0 mg, 0.75 mmol), phenacyl bromide **5a** (298.5 mg, 1.5 mmol), K<sub>2</sub>CO<sub>3</sub> (138.2 mg, 1 mmol), PPh<sub>3</sub> (157.2 mg, 0.6 mmol), and product **7a** 189.3 mg (0.425 mmol).

$$AE(7a) = \frac{445.52}{147.14 + 153.61 + 125.13 + 199.05} \times 100 = 71$$

$$AEf(7a) = 71 \times 85\% = 60$$

$$CE(7a) = \frac{26 \times 0.425}{7 \times 0.5 + 5 \times 0.6 + 6 \times 0.55 + 8 \times 1.5} \times 100 = 51$$

$$RME(7a) = \frac{189.3}{73.6 + 92.2 + 68.8 + 298.5} \times 100 = 36$$

$$OE(7a) = \frac{36}{71} \times 100 = 51$$

$$PMI(7a) = \frac{73.6 + 92.2 + 68.8 + 1580 + 76.0 + 298.5 + 138.2 + 157.2}{189.3} = 13$$

$$MP(7a) = \frac{1}{13} \times 100 = 7.7$$

$$E \text{ Factor}(7a) = 13 - 1 = 12$$

$$SI(7a) = \frac{1580 + 76}{189.3} = 8.7$$

$$WI(7a) = \frac{0}{189.3} = 0$$

## 5.2 Three-step isolated process

### Step 1: Synthesis of ethyl (1R,3S,3aR,6aS)-3-(2-azidophenyl)-5-ethyl-1-methyl-4,6-dioxoocta-hydro-pyrrolo[3,4-c]pyrrole-1-carboxylate (**4a**)

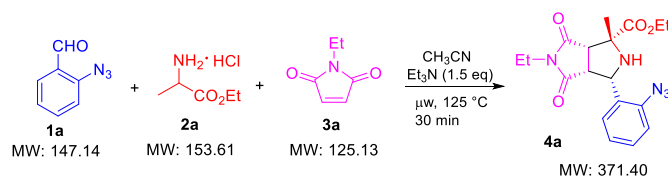

#### Experimental procedures:

A solution of 2-azidobenzaldehyde **1a** (73.6 mg, 0.5 mmol), L-alanine ethyl ester **2a** (92.2 mg, 0.6

mmol) and N-ethylmaleimide **3a** (68.8 mg, 0.55 mmol) in CH<sub>3</sub>CN (2 mL) with Et<sub>3</sub>N (76.0mg, 0.75 mmol) were heated at 125 °C for 30 min under microwave in a sealed vial. The concentrated reaction mixture was separated on YAMAZEN AI-580 flash column system to afford pyrrolidine **4a** 168.8 mg (91% yield).

Materials used for metrics calculations: 2-azidobenzaldehyde **1a** (73.6 mg, 0.5 mmol), L-alanine ethyl ester **2a** (92.2 mg, 0.6 mmol) and N-ethylmaleimide **3a** (68.8 mg, 0.55 mmol), CH<sub>3</sub>CN (1580 mg, 2 mL), Et<sub>3</sub>N (76.0 mg, 0.75 mmol) and pyrrolidine **4a** 168.8 mg (0.455 mmol).

$$AE(4a) = \frac{371.4}{147.14 + 153.61 + 125.13} \times 100 = 87$$

$$AEf(4a) = 87 \times 91\% = 79$$

$$CE(4a) = \frac{18 \times 0.455}{7 \times 0.5 + 5 \times 0.6 + 6 \times 0.55} \times 100 = 83$$

$$RME(4a) = \frac{168.8}{73.6 + 92.2 + 68.8} \times 100 = 72$$

$$OE(4a) = \frac{72}{87} \times 100 = 81$$

$$MI(4a) = \frac{73.6 + 92.2 + 68.8 + 1580 + 76}{168.8} = 11$$

$$MP(4a) = \frac{1}{11} \times 100 = 9.1$$

$$E \text{ Factor}(4a) = 11 - 1 = 10$$

$$SI(4a) = \frac{1580 + 76}{168.8} = 9.8$$

$$WI(4a) = \frac{0}{168.8} = 0$$

## Step 2: Synthesis of ethyl (1R,3S,3aR,6aS)-3-(2-azidophenyl)-5-ethyl-1-methyl-4,6-dioxo-2-(2-oxo-2-phenylethyl)octahydropyrrolo[3,4-c]pyrrole-1-carboxylate (**6a**)

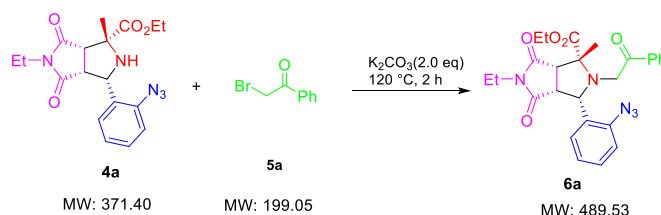

### Experimental procedures:

A solution of pyrrolidine **4a** (168.8 mg, 0.455 mmol), phenacyl bromide **5a** (271.6 mg, 1.36 mmol) and K<sub>2</sub>CO<sub>3</sub> (125.6 mg, 0.91 mmol) in CH<sub>3</sub>CN (2 mL) was heated at 120 °C for 2 h. The concentrated reaction mixture was separated on YAMAZEN AI-580 flash column system to afford amino ketone **6a** 200.5 mg (90% yield).

Materials used for metrics calculations: pyrrolidine **4a** (168.8 mg, 0.455 mmol), phenacyl bromide

**5a** (271.6 mg, 1.36 mmol), K<sub>2</sub>CO<sub>3</sub> (125.6 mg, 0.91 mmol), CH<sub>3</sub>CN (1580 mg, 2 mL) and amino ketone **6a** (200.5 mg, 0.40 mmol).

$$AE(6a) = \frac{489.53}{371.4 + 199.05} \times 100 = 85.8$$

$$AEf(6a) = 85.8 \times 90\% = 77$$

$$CE(6a) = \frac{26 \times 0.40}{18 \times 0.455 + 8 \times 1.36} \times 100 = 54$$

$$RME(6a) = \frac{200.5}{168.8 + 271.6} \times 100 = 45$$

$$OE(6a) = \frac{45}{85.8} \times 100 = 52$$

$$MI(6a) = \frac{168.8 + 271.6 + 125.6 + 1580}{200.5} = 10.7$$

$$MP(6a) = \frac{1}{10.7} \times 100 = 9.3$$

$$E \text{ Factor}(6a) = 10.7 - 1 = 9.7$$

$$SI(6a) = \frac{1580}{200.5} = 7.9$$

$$WI(6a) = \frac{0}{200.5} = 0$$

**Step 3: Synthesis of ethyl (9R,9aS,12aR,12bS)-11-ethyl-9-methyl-10,12-dioxo-6-phenyl-7,9,9a,10,11,12,12a,12b-octahydrobenzo[f]pyrrolo[3',4':3,4]pyrrolo[1,2-d][1,4]diazepine-9-carboxylate (7a)**

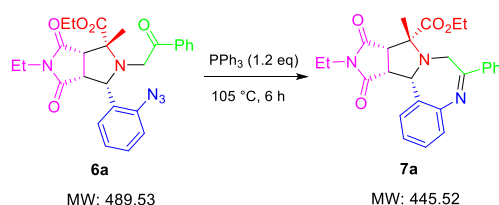

#### Experimental procedures:

A solution of amino ketone **6a** (200.5 mg, 0.40 mmol) and PPh<sub>3</sub> (125.8 mg, 0.48 mmol) in CH<sub>3</sub>CN (2 mL) was heated at 105 °C for 6 h. The concentrated reaction mixture was separated on YAMAZEN AI-580 flash column system to afford product **7a** 153.2 mg (85% yield).

Materials used for metrics calculations: amino ketone **6a** (200.5 mg, 0.40 mmol), PPh<sub>3</sub> (125.8 mg, 0.48 mmol), CH<sub>3</sub>CN (1580 mg, 2 mL), product **7a** (153.2 mg, 0.344 mmol).

$$AE(7a) = \frac{445.52}{489.53} \times 100 = 91$$

$$AEf(7a) = 91 \times 85\% = 77$$

$$CE(7a) = \frac{26 \times 0.344}{26 \times 0.40} \times 100 = 86$$

$$RME(7a) = \frac{153.2}{200.5} \times 100 = 76$$

$$OE(7a) = \frac{76}{91} \times 100 = 83$$

$$MI(7a) = \frac{200.5 + 125.8 + 1580}{153.2} = 12.4$$

$$MP(7a) = \frac{1}{12.4} \times 100 = 8$$

$$E \text{ Factor}(7a) = 12.4 - 1 = 11.4$$

$$SI(7a) = \frac{1580}{153.2} = 10.3$$

$$WI(7a) = \frac{0}{153.2} = 0$$

### Cumulative metrics for compound 7a:

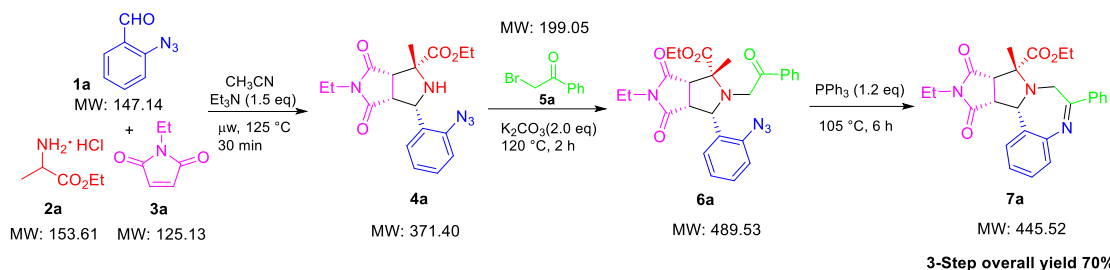

$$AE(7a \text{ cumulative}) = \frac{445.2}{147.14 + 153.61 + 125.13 + 199.05} = 71$$

$$AEf(7a \text{ cumulative}) = 71 \times 70\% = 50$$

$$CE(7a \text{ cumulative}) = \frac{26 \times 0.344}{7 \times 0.5 + 5 \times 0.6 + 6 \times 0.55 + 8 \times 1.36} \times 100 = 43$$

$$RME(7a \text{ cumulative}) = \frac{153.2}{73.6 + 92.2 + 68.8 + 271.6} = 30$$

$$OE(7a \text{ cumulative}) = \frac{30}{71} \times 100 = 42$$

$$PMI(7a \text{ cumulative}) = \frac{73.6 + 92.2 + 68.8 + 1580 \times 3 + 76 + 271.6 + 125.6 + 125.8}{153.2} = 36$$

$$MP(7a \text{ cumulative}) = \frac{1}{36} \times 100 = 2.7$$

$$E \text{ Factor}(7a \text{ cumulative}) = 36 - 1 = 35$$

$$SI(7a \text{ cumulative}) = \frac{1580 \times 3 + 76}{153.2} = 31.4$$

$$WI(7a \text{ cumulative}) = \frac{0}{153.2} = 0$$

## 6. References for green metrics

- 1 F. Roschangar, R. A. Sheldon and C. H. Senanayake, *Green Chem.* 2015, **17**, 752–768.
- 2 C. R. McElroy, A. Constantinou, L. C. Jones, L. Summerton and J. H. Clark, *Green Chem.*, 2015, **17**, 3111–3121.
- 3 B. M. Trost, *Science*, 1991, **254**, 1471–1477.
- 4 R. A. Sheldon, *Chem. Ind.*, 1992, **23**, 903–906.
- 5 N. J. Willis, C. A. Fisher, C. M. Alder, A. Harsanyi, L. Shukla, J. P. Adams and G. Sandford, *Green Chem.*, 2016, **18**, 1313–1318.
- 6 T. V. T. Phan, C. Gallardo and J. Mane, *Green Chem.*, 2015, **17**, 2846–2852.
- 7 S. Abou-Shehada, P. Mampuy, B. U. W. Maes, J. H. Clark and L. Summerton, *Green Chem.*, 2017, **19**, 249–258.
- 8 R. A. Sheldon, *Green Chem.*, 2007, **9**, 1273–1283.
- 9 R. A. Sheldon, *Green Chem.*, 2017, **19**, 18–43.
- 10 C. Jiménez-González, A. D. Curzons, D. J. C. Constable, M. R. Overcash and V. L. Cunningham, *Clean Prod. Processes*, 2001, **3**, 35–41.
- 11 P. A. Wender, M. P. Croatt and B. Witulski, *Tetrahedron*, 2006, **62**, 7505–7511.
- 12 D. J. C. Constable, A. D. Curzons and V. L. Cunningham, *Green Chem.*, 2002, **4**, 521–527.
- 13 C. Jiménez-González, C. S. Ponder, Q. B. Broxterman and J. B. Manley, *Org. Process Res. Dev.*, 2011, **15**, 912–917.
- 14 C. Jiménez-González, A. D. Curzons, D. J. C. Constable and V. L. Cunningham, *Clean Technol. Environ. Policy*, 2005, **7**, 42–50.
